# Supplementary material for: Genomic histories of polyploidy, diversification, and admixture in a Hawaiian plant radiation
Source: Research Square preprint supplement (doi:10.21203/rs.3.rs-3167181/v1), 2023-07-27
Supplement: Supplementary file 1 [file 081c13e9b2f461bcb1879550.xlsx]

## Sheet: S1
Supplementary Table 1: Repeat characterization and statistics of the S. calaminthoides reference, as reported by the EDTA annotation pipeline.
Repeat	Class	Count	bp Masked	% masked
DNA	DTA	131575	23858207	0.0169
	DTC	284865	72411686	0.0512
	DTH	102086	15156174	0.0107
	DTM	465993	78644588	0.0556
	DTT	463398	57960563	0.041
	Helitron	423195	118220469	0.0836
Helitron		190	168089	0.0001
LINE	unknown	1957	1394668	0.001
LTR	Copia	582583	424243957	0.3
	Gypsy	130036	104954545	0.0742
	unknown	383789	134283354	0.095
MITE	DTA	43559	6160684	0.0044
	DTC	5097	861393	0.0006
	DTH	15051	2342286	0.0017
	DTM	68923	10196558	0.0072
	DTT	73772	8381295	0.0059
TIR	EnSpm_CACTA	804	295598	0.0002
	MuDR_Mutator	2375	1792107	0.0013
	PIF_Harbinger	170	86083	0.0001
	hAT	502	264483	0.0002
Unknown		79636	24884746	0.0176
pararetrovirus		868	328644	0.0002
Low_complexity		27500	1399888	0.001
Simple repeats		165604	7499382	0.0053
Total repeat content		3453528	1095789447	0.7749

## Sheet: S2
Supplementary Table 2: Assembly statistics for S. calaminthoides reference.
# contigs (>= 0 bp)	434
# contigs (>= 1000 bp)	434
# contigs (>= 5000 bp)	384
# contigs (>= 10000 bp)	362
# contigs (>= 25000 bp)	310
# contigs (>= 50000 bp)	256
Total length (>= 0 bp)	1415487396
Total length (>= 1000 bp)	1415487396
Total length (>= 5000 bp)	1415381433
Total length (>= 10000 bp)	1415215846
Total length (>= 25000 bp)	1414302982
Total length (>= 50000 bp)	1412308834
# contigs	434
Largest contig	53555980
Total length	1415487396
GC (%)	36.55
N50	37195823
N75	31874681
L50	17
L75	27
# N's per 100 kbp	102.26

## Sheet: S3
Supplementary Table 3: BUSCO statistics and N50 for the reference assembly and corresponding gene models.
	N50	BUSCO complete %	BUSCO single %	BUSCO duplicate %	BUSCO fragmented %	BUSCO missing %
Genome	37195823	94.9	49.4	45.5	0.9	4.2
Gene models	4162	86	35.3	50.7	4	10

## Sheet: S4
Supplementary Table 4: Information for the samples used in this dataset, including sources and geographic distribution. UB = University at Buffalo, UNA = University of Alabama.
Genus	Species	Project ID number	Sample number	Source & collection number	Native range
Haplostachys	haplostachya	10	HI03-33	National Tropical Botanical Garden, #950403	Hawaiian Islands (Kauai, Maui, Hawaii)
Phyllostegia	ambigua	21	HI03-59	Volcano Rare Plant Facility, #000606	Hawaiian Islands (Maui, Hawaii)
Phyllostegia	cf. electra	22	HI03-34	National Tropical Botanical Garden, #12-8-01	Hawaiian Islands (Kauai)
Phyllostegia	floribunda	7	HI03-63	Volcano Rare Plant Facility, #971002	Hawaiian Islands (Hawaii)
Phyllostegia	macrophylla	23	HI03-54	Volcano Rare Plant Facility, #010616	Hawaiian Islands (E. Maui, E. Hawaii)
Phyllostegia	racemosa	24	HI03-57	Volcano Rare Plant Facility, #950601	Hawaiian Islands (Hawaii)
Phyllostegia	stachyoides	25	HI03-28	National Tropical Botanical Garden, #010358	Hawaiian Islands (Molokai, W. Maui, and Hawaii)
Phyllostegia	velutina	26	HI03-61	Volcano Rare Plant Facility, #960302	Hawaiian Islands (Hawaii)
Phyllostegia	vestita	27	HI03-62	Volcano Rare Plant Facility, #010206	Hawaiian Islands (Hawaii)
Phyllostegia	waimeae	28	HI03-27	National Tropical Botanical Garden, #010580	Hawaiian Islands (Kauai)
Phyllostegia	warshaueri	29	HI03-30	National Tropical Botanical Garden, #990810	Hawaiian Islands (Hawaii)
Phyllostegia	warshaueri	30	HI03-55	Volcano Rare Plant Facility, #980801	Hawaiian Islands (Hawaii)
Stenogyne	bifida	31	HI03-32	National Tropical Botanical Garden, #8-7-98	Hawaiian Islands (Molokai)
Stenogyne	calaminthoides	32	HI03-04	Field collection, HI03-04	Hawaiian Islands (Hawaii)
Stenogyne	campanulata	33	HI03-36	National Tropical Botanical Garden, #030081	Hawaiian Islands (Kauai)
Stenogyne	cranwelliae	34	HI03-64	Volcano Rare Plant Facility, #010509	Hawaiian Islands (Hawaii)
Stenogyne	kealiae	35	HI03-31	National Tropical Botanical Garden, #990434	Hawaiian Islands (Kauai)
Stenogyne	macrantha	36	HI03-60	Volcano Rare Plant Facility, #990512	Hawaiian Islands (Hawaii)
Stenogyne	macrantha	37	HI03-68	Volcano Rare Plant Facility, #020425	Hawaiian Islands (Hawaii)
Stenogyne	macrantha	38	HI03-70	Volcano Rare Plant Facility, #021206	Hawaiian Islands (Hawaii)
Stenogyne	microphylla	46	1.1.1	Field collection, HI03-1.1.1	Hawaiian Islands (E. Maui, Hawaii)
Stenogyne	cf. oxygona	39	HI03-66	Volcano Rare Plant Facility, #021217	Hawaiian Islands (Hawaii: Kohala Mountains)
Stenogyne	cf. purpurea	40	HI03-29	National Tropical Botanical Garden, #010576	Hawaiian Islands (Kauai)
Stenogyne	purpurea	9	HI03-40	Field collection, HI03-40	Hawaiian Islands (Kauai)
Stenogyne	rugosa	41	HI03-56	Volcano Rare Plant Facility, HI03-56	Hawaiian Islands (E. Maui, Hawaii)
Stenogyne	rugosa	8	HI03-73	Field collection, HI03-73	Hawaiian Islands (E. Maui, Hawaii)
Stenogyne	rugosa	42	HI03-65	Volcano Rare Plant Facility, #021207	Hawaiian Islands (E. Maui, Hawaii)
Stenogyne	scrophularioides	43	HI03-58	Volcano Rare Plant Facility, #020423	Hawaiian Islands (Hawaii)
Stenogyne	scrophularioides	44	HI03-69	Volcano Rare Plant Facility, #950302	Hawaiian Islands (Hawaii)
Stenogyne	sessilis	45	HI03-67	Volcano Rare Plant Facility, #021212	Hawaiian Islands (Lanai, Maui, Hawaii)
Stachys	affinis	17	LVA359	Cultivated, C. Lindqvist & V.A. Albert 359 (UNA)	China to N. Myanmar
Stachys	ajugoides var. rigida	15	CL11-02	Cultivated, C. Lindqvist 11-02 (UB)	W. USA to Mexico, Baja California
Stachys	albens	2	CL11-03	Cultivated, C. Lindqvist 11-03 (UB)	California to Utah
Stachys	albens	16	CL11-06	Cultivated, C. Lindqvist 11-06 (UB)	California to Utah
Stachys	bullata	4	CL11-04	Cultivated, C. Lindqvist 11-04 (UB)	California
Stachys	byzantina	6	LVA356	Cultivated, C. Lindqvist & V.A. Albert 356 (UNA)	Krym, N. Turkey to N. Iran and Greece
Stachys	byzantina	13	CL10-04	Cultivated, C. Lindqvist 10-04 (UB)	Krym, N. Turkey to N. Iran and Greece
Stachys	chamissonis	3	CL11-01	Cultivated, C. Lindqvist 11-01 (UB)	W. Canada to W. USA
Stachys	chamissonis	14	CL11-05	Cultivated, C. Lindqvist 11-05 (UB)	W. Canada to W. USA
Stachys	coccinea	5	CL10-03	Cultivated, C. Lindqvist 10-03 (UB)	Arizona to Texas and C. America
Stachys	coccinea	11	CL10-01	Cultivated, C. Lindqvist 10-01 (UB)	Arizona to Texas and C. America
Stachys	floridana	20	JBNx1	Cultivated, J.B. Nelson s.n. (USCH)	Florida, Alabama
Stachys	strictiflora	1	CL11-07	Cultivated, C. Lindqvist 10-07 (UB)	China, Yunnan
Stachys	sylvatica	18	LVA358	Cultivated, C. Lindqvist & V.A. Albert 358 (UNA)	Macaronesia, Europe to W. Himalaya
Stachys	tenuifolia	19	JBNx2	Cultivated, J.B. Nelson s.n. (USCH)	E. Canada, C. to E. USA

## Sheet: S5
Supplementary Table 5: Reference mapping statistics for each sample.
	Bedtools		Trimmomatic	MarkDuplicates
Sample (#)	Depth	Width	Input fastq read pairs	UNPAIRED_READS	READ_PAIRS	SECONDARY_OR_SUPPLEMENTARY_RDS	UNPAIRED_READ_DUPLICATES	READ_PAIR_DUPLICATES	READ_PAIR_OPTICAL_DUPLICATES	PERCENT_DUPLICATION	% Mapped before pdrm	% Mapped final
S. byzantina (13)	4.35292	0.178084	113297076	2713520	32198756	741263	1168383	3999533	670468	0.136601	0.296173	0.255715
S. byzantina (6)	4.47843	0.185641	115042610	2748514	33341096	780575	1210534	4672334	611906	0.152025	0.301761	0.255886
S. strictiflora (1)	10.5441	0.330091	105510280	602061	59879070	1738092	221476	7035606	1144772	0.118749	0.570372	0.502641
S. tenuifolia (19)	11.728	0.334057	116849870	697189	68225825	1567243	283845	9874463	1776913	0.146066	0.586859	0.501139
S. floridana (20)	11.374	0.341927	124444932	741287	66880439	1526863	312035	9712564	1772052	0.146742	0.540408	0.461108
S. affinis (17)	11.4385	0.352734	115831088	612992	66467011	1832905	237069	8926620	1542569	0.13546	0.576473	0.498384
S. sylvatica (18)	10.3213	0.365019	120121334	853273	62942775	1977628	329922	9057296	1399166	0.145532	0.527545	0.450771
S. coccinea (11)	8.50794	0.381746	121406337	1252645	52687121	1413383	548929	6890744	1286075	0.134398	0.439132	0.380114
S. coccinea (5)	8.71963	0.385677	122059674	1270659	53581057	1466310	557411	7161654	895443	0.137235	0.444179	0.383223
S. albens (2)	12.3102	0.514395	113626202	510419	68533697	1267697	175957	8068404	1328416	0.118571	0.605397	0.533614
S. albens (16)	11.6943	0.520569	109300271	540434	66045056	1191695	189055	8489774	1694671	0.129447	0.606726	0.528187
S. chamissonis (14)	13.5968	0.532702	121962921	574195	76751407	1292493	202604	10182753	2032754	0.133492	0.631655	0.547334
S. bullata (4)	11.0863	0.533433	100786733	452526	61693361	1070315	145215	7395779	1220627	0.120614	0.614363	0.540262
S. chamissonis (3)	16.2637	0.544871	142223583	611572	90062151	1578185	218166	10544199	1733944	0.117888	0.635393	0.560488
S. ajugoides. var. rigida (15)	12.501	0.552418	116260613	600623	70832526	1227591	219118	9419930	1936980	0.133968	0.61184	0.529873
H. haplostachya (10)	14.8625	0.585528	139008445	326220	85930449	1194665	106595	13955157	2040078	0.162712	0.61934	0.518566
P. waimeae (28)	13.989	0.627208	127781870	303710	81152444	975438	102878	13728552	2408392	0.169487	0.636274	0.528434
P. floribunda (7)	11.6202	0.628844	100052690	168049	64667947	738657	45552	8747352	1316205	0.135442	0.647179	0.559524
P. cf. electra (22)	12.7468	0.629523	111218161	199228	71474500	827603	59142	10033758	1632118	0.1406	0.643547	0.553064
P. stachyoides (25)	14.4373	0.635437	127876884	309771	82392576	1000989	100150	12872532	2280939	0.156548	0.645523	0.544468
P. racemosa (24)	14.0091	0.636929	123311615	260784	78962822	843392	81564	11517465	1920126	0.146134	0.641409	0.547677
P. vestita (27)	13.6957	0.645476	121191938	228410	78488700	855102	74350	12602143	2148980	0.1608	0.648582	0.54429
P. velutina (26)	13.3222	0.645763	116907910	237346	75353504	786118	72954	11271015	1924806	0.149823	0.645569	0.548848
S. cf. purpurea (40)	12.1091	0.64588	104399606	250819	67929335	660117	72073	9665058	2365143	0.142548	0.651868	0.558945
P. ambigua (21)	13.6202	0.646335	119397418	260189	76573903	766309	78152	11084824	1919876	0.145024	0.642426	0.549259
P. macrophylla (23)	14.3175	0.650466	125343480	297821	80721903	840654	93635	11861628	2090977	0.147253	0.645194	0.550187
S. campanulata (33)	13.4619	0.652216	122950964	273461	77215143	819295	91382	12062536	2020044	0.156534	0.629128	0.530648
P. warshaueri (30)	14.2601	0.656367	124685564	251582	80742617	825182	77928	12151001	2368684	0.150738	0.648579	0.550813
S. microphylla (46)	12.2435	0.658243	102750291	283121	69080357	705258	78550	10177492	2804310	0.147594	0.673691	0.574258
P. warshaueri (29)	15.0168	0.658636	131611292	284267	85158636	870542	89579	12952094	2486248	0.152365	0.648127	0.549374
S. kealiae (35)	15.4381	0.659489	134840784	306446	89123371	925669	105129	14776368	2512814	0.166101	0.662089	0.552115
S. bifida (31)	16.0344	0.66474	134591298	306636	91323658	939069	104051	14296358	2943357	0.156852	0.679665	0.573058
S. purpurea (9)	17.1591	0.665935	146497856	273967	96396878	1023657	87653	13896860	1802382	0.144412	0.658944	0.563784
S. rugosa (42)	12.678	0.671577	102249482	261866	69880083	691711	68689	8926484	2223935	0.127992	0.684708	0.597071
S. rugosa (8)	16.8663	0.674583	136101253	255976	93575889	953067	78949	12645902	2021651	0.135377	0.688487	0.595281
S. rugosa (41)	13.327	0.677143	107569140	305607	73736797	711407	83285	9672047	2561244	0.131462	0.686903	0.596602
S. macrantha (36)	13.0765	0.696643	104782245	173089	73313858	672934	51670	10623508	1774202	0.145086	0.700504	0.598871
S. sessilis (45)	12.7959	0.702567	102966656	240929	73039631	635666	70536	11654855	3147663	0.159788	0.710522	0.596989
S. scrophularioides (43)	13.989	0.73535	103421367	245257	77409813	528756	66750	10516265	2759599	0.136067	0.749675	0.647669
S. cranweliae (34)	15.5732	0.736506	117556484	228656	87908646	587700	71949	13473413	2398794	0.153476	0.748772	0.633853
S. scrophularioides (44)	14.0672	0.737508	103386241	235949	77133701	495345	61825	9899470	2503095	0.128546	0.747214	0.651163
S. macrantha (38)	15.3615	0.738142	114299325	203629	85719747	562365	59315	12300799	2932802	0.143676	0.750849	0.642971
S. oxygona (39)	15.7334	0.74116	120449513	229308	88750744	618914	67633	13488217	3294637	0.152163	0.737781	0.625518
S. macrantha (37)	14.0587	0.742537	103905590	217032	77903801	513432	57906	10685889	2706379	0.137348	0.7508	0.647679
S. calaminthoides (32)	14.0342	0.753282	103137096	156849	77667345	477678	42483	10647167	2098954	0.137222	0.75381	0.650371

## Sheet: S6
Supplementary Table 6: Datasets used in this study, their corresponding filtering and downstream analyses used.
Dataset	Samples	Filters	Downstream analyses	SNP # total sites	SNP # variable sites
DS4	All samples	Indels removed, no missing data, remove contigs < 1M, Depth 5-500, mac 2, min GQ 30, GATK best guidelines filtering	RAxML , TreeMix, PCA, ADMIXTURE	1010552	788945
DS4a	Only Stachys with width > 30% + Hawaiian mints	Indels removed, no missing data, remove contigs < 1M, Depth 5-500, mac 2, min GQ 30, GATK best guidelines filtering	RAxML, TreeMix, PCA, ADMIXTURE, Twisst	4336466	3486618
DS4b	Only Hawaiian mints	Indels removed, no missing data, remove contigs < 1M, Depth 5-500, mac 2, min GQ 30, GATK best guidelines filtering	RAxML , TreeMix, PCA, ADMIXTURE	5461880	4559640
DS4c	All samples besides S. byzantina	Indels removed, no missing data, remove contigs < 1M, Depth 5-500, mac 2, min GQ 30, GATK best guidelines filtering	RAxML , TreeMix, PCA, ADMIXTURE	1235072	876217
DS7	All samples	Indels removed, remove contigs < 1M, Depth 5-500, mac 2, min GQ 30, GATK best guidelines filtering	f-statistics	58309299
DS10	All samples	Indels removed, 10% missing data, remove contigs < 1M, Depth 5-500, mac 2, min GQ 30, GATK best guidelines filtering	Twisst	5071269
HM1	Only S. rugosa/microphylla samples	Indels removed, no missing data, remove contigs < 1M, Depth 5-500, mac 2, min GQ 30, GATK best guidelines filtering	RAxML, PCA , ADMIXTURE, NeighborNet	172474	37126
HM2	Only Stenogyne samples	Indels removed, no missing data, remove contigs < 1M, Depth 5-500, mac 2, min GQ 30, GATK best guidelines filtering	NeighborNet	193888	65499
HM4	Only Stenogyne samples	Indels removed, remove contigs < 1M, Depth 5-500, mac 2, min GQ 30, GATK best guidelines filtering	f-statistics	3849797

## Sheet: S7
Supplementary Table 7: Plastid mapping depth and width statistics.
Sample	Depth	Width
S. strictiflora (1)	2674.22	0.98595
H. haplostachya (10)	6445.79	0.986901
S. byzantina (6)	8650.01	0.984453
S. purpurea (9)	2843.51	0.987685
S. coccinea (5)	5897.98	0.987566
S. cham (3)	7658.06	0.988207
P. floribunda (7)	1488.19	0.986552
S. rugosa (8)	4983.1	0.989704
S. bullata (4)	2153.41	0.985531
S. albens (2)	5132.14	0.988231
S. coccinea (11)	2207.82	0.986956
S. byzantina (13)	4668.37	0.98424
S. chamissonis (14)	6290.3	0.98793
S. ajugoides. var. rigida (15)	3654.03	0.987653
S. albens (16)	4033.64	0.986655
S. affinis (17)	3365.18	0.988738
S. sylvatica (18)	6121.72	0.988318
S. tenuifolia (19)	3632.55	0.986125
S. floridana (20)	5638.08	0.986917
P. ambigua (21)	2570.1	0.988318
P. cf. electra (22)	1493.46	0.986069
P. macrophylla (23)	2911.27	0.985942
P. racemosa (24)	2240.93	0.987305
P. stachyoides (25)	2844.15	0.987906
P. velutina (26)	1396.64	0.986259
P. vestita (27)	1276.6	0.987059
P. waimeae (28)	4981.52	0.987851
P. warshaueri (29)	4955.36	0.982933
P. warshaueri (30)	3959.8	0.987178
S. bifida (31)	4578.13	0.987225
S. calaminthoides (32)	1021.39	0.98751
S. campanulata (33)	3598.86	0.988033
S. cranweliae (34)	2759.71	0.987312
S. kealiae (35)	4697.22	0.988596
S. macrantha (36)	2725.8	0.988865
S. macrantha (37)	1399.42	0.986996
S. macrantha (38)	1525.97	0.986671
S. oxygona (39)	2796.36	0.989538
S. cf. purpurea (40)	5206.51	0.986623
S. rugosa (41)	2287.6	0.986267
S. rugosa (42)	2239.64	0.987495
S. scrophularioides (43)	3080.5	0.984477
S. scrophularioides (44)	3616.67	0.986101
S. sessilis (45)	1787.07	0.98778
S. microphylla (46)	2789.84	0.988255

## Sheet: S8
Supplementary Table 8: Genome size estimates and various quality assessment statistics for each Illumina based de novo MaSuRCA assembly.
Sample (#)	KmerGenie predicted assembly size (Haploid)	MaSuRCA assembly size (including Ns)	MaSuRCA N50	MaSuRCA BUSCO score	MaSuRCA duplicated complete BUSCOs	MaSuRCA single copy complete BUSCOs	Ratio double:single copy	MaSuRCA fragmented BUSCOs	MaSuRCA missing BUSCOs
S. floridana (20)	858302436	655194223	15351	93.6	82	1902	0.0431125	71	87
S. tenuifolia (19)	652325591	558770461	11653	91.8	91	1855	0.0490566	99	97
S. strictiflora (1)	780115538	580923021	5143	90.5	95	1824	0.0520833	140	110
S. byzantina (13)	563714644	528697074	8911	92	106	1846	0.0574215	107	94
S. byzantina (6)	579791112	528643545	8966	91.7	114	1831	0.0622611	129	89
S. affinis (17)	1071374108	905925940	3002	75.9	276	1334	0.206897	330	237
S. sessilis (45)	1176237223	1005720886	4053	84.8	563	1244	0.452572	228	169
S. macrantha (37)	1181019237	1016840054	5406	87.2	693	1155	0.6	152	155
S. macrantha (36)	1101654695	1008621116	5724	86	685	1139	0.601405	194	146
S. calaminthoides (32)	1122037451	1022330910	5508	87.2	695	1154	0.602253	176	155
S. scrophularioides (43)	1220804525	1027370413	5934	87.9	709	1155	0.613853	182	147
S. chamissonis (3)	1285009408	917477717	4352	79.8	656	1037	0.632594	265	240
S. microphylla (46)	1176881498	1020092466	5501	86.9	716	1127	0.635315	175	154
S. rugosa (8)	1216866187	957318253	6097	88.5	730	1148	0.635889	144	148
S. rugosa (42)	1210983588	1025791469	5855	87.5	724	1132	0.639576	183	134
S. oxygona (39)	1285666791	1069686212	5229	87.8	731	1131	0.646331	150	144
S. scrophularioides (44)	1211763366	996145965	5310	86.5	722	1113	0.648697	180	157
S. cranweliae (34)	1237932875	1052369294	4716	81.1	753	1132	0.665194	259	182
S. campanulata (33)	1145151366	1022326163	5636	85.8	742	1077	0.688951	161	160
P. cf. electra (22)	1065646194	971950807	6516	87.2	762	1089	0.699725	182	137
S. bullata (4)	1081534666	911800064	4302	78.2	683	976	0.699795	280	244
S. macrantha (38)	1187821147	1029874335	5789	87.9	772	1092	0.70696	157	144
S. rugosa (41)	1222112014	1034466219	6479	87.9	777	1089	0.713499	161	146
S. ajugoides. var. rigida (15)	1425792135	1208956715	3618	76.7	684	944	0.724576	308	247
P. floribunda (7)	997614534	956555488	7766	86	772	1052	0.73384	159	156
S. cf. purpurea (40)	1090057051	971071596	6555	87.1	784	1063	0.737535	153	160
P. warshaueri (30)	1121073866	989734890	7540	87.5	795	1061	0.749293	164	163
P. warshaueri (29)	1161882210	1022721943	8566	87.8	812	1050	0.773333	145	142
P. racemosa (24)	1022453582	964097932	8746	87.3	813	1039	0.782483	166	146
P. stachyoides (25)	1009899603	983274389	8218	84.4	795	995	0.798995	187	163
P. vestita (27)	1010758852	956136522	7734	87.4	824	1030	0.8	156	146
P. ambigua (21)	1012626565	949614639	8479	87	824	1023	0.805474	147	154
P. velutina (26)	1007778746	948715647	8081	86.2	819	1010	0.810891	170	161
P. macrophylla (23)	1020256756	926662336	7610	86	821	1004	0.817729	188	172
P. waimeae (28)	1056751312	965324855	9576	88.9	851	1034	0.823017	147	138
S. albens (2)	1121300772	976669580	7677	86.3	838	992	0.844758	182	156
H. haplostachya (10)	1224315352	1008253220	11760	91.8	898	1050	0.855238	82	105
S. albens (16)	1114391529	949513102	6774	85.5	837	975	0.858462	198	150
S. kealiae (35)	1182679331	1039490649	8918	89.9	884	1022	0.864971	130	132
S. purpurea (9)	1317316470	1046569536	8270	89.2	881	1012	0.870553	144	128
S. chamissonis (14)	1066152663	927553490	7404	85.4	863	948	0.910338	206	164
S. coccinea (11)	1413768576	1211108084	3687	86.8	896	947	0.946146	174	148
S. bifida (31)	1146638391	1022744137	10681	89.5	924	973	0.94964	116	118
S. coccinea (5)	1498259984	1239410326	3545	84.7	882	914	0.964989	188	161
S. sylvatica (18)	844652899	843139090	8646	87.7	936	925	1.01189	174	139

## Sheet: S9
Supplementary Table 9: Chromosome based mapping depth for each sample mapped to S. calaminthoides.
Sample	Chr25_UC	Chr40_ENA	Chr26_ENA	Chr27_UC	Chr38_UC	Chr39_ENA	Chr10_UC	Chr8_ENA	Chr20_UC	Chr51_ENA	Chr52_UC	Chr46_UC	Chr28_UC	Chr29_ENA	Chr43_UC	Chr44_ENA	Chr13_ENA	Chr32_ENA	Chr54_UC	Chr22_UC	Chr23_ENA	Chr37_UC	Chr15_ENA	Chr16_UC	Chr41_UC	Chr2_ENA	Chr5_UC	Chr3_ENA	Chr1_ENA	Chr6_ENA	Chr42_ENA	Chr47_ENA
10. H. haplostachya	12.5981	11.7117	14.0696	12.113	12.9938	12.8088	14.3877	14.4016	13.9337	13.6173	13.1997	13.2901	14.2132	13.9076	15.1952	14.223	15.5216	26.5533	12.5228	14.0808	13.3395	20.2346	12.9494	14.7833	14.5253	12.8534	15.0392	13.059	14.5146	13.946	12.8787	19.7677
11. S. coccinea	11.1568	4.02421	6.51158	11.0721	12.1234	3.96462	11.4241	5.35056	11.133	4.10646	12.731	12.5336	12.9411	4.36331	12.8863	4.11711	4.52088	4.3119	11.1999	11.7093	4.2732	13.0114	4.09484	13.965	13.3865	4.42375	13.4493	4.41712	4.87803	4.02587	5.27792	5.11187
13. S. byzantina	3.0609	3.84536	5.3161	2.87562	3.42569	3.9007	3.0656	4.48804	3.57706	4.09692	3.06149	2.94831	3.56539	4.2997	3.58033	4.39577	4.52921	4.0388	2.78628	3.74804	4.34878	7.35306	4.09402	4.00349	3.80617	4.19006	3.84332	4.45418	5.3179	4.29755	4.01151	5.01981
14. S. chamissonis	11.9551	12.5302	14.2696	11.038	12.8637	13.0351	12.3786	13.4246	12.1577	11.9829	11.9136	12.6351	12.551	13.3893	12.7394	13.7147	13.1771	12.2416	11.6173	12.9441	11.6568	17.8898	12.2486	18.0911	13.4893	13.0214	14.0048	12.9914	13.1613	13.2953	14.0985	15.4941
15. S. ajugoides var. rigida	10.7615	11.4182	13.2777	10.0048	11.749	11.7458	11.1962	12.3405	10.6638	10.7897	11.3153	11.4417	11.4049	12.6395	11.4926	12.6481	12.6776	11.4311	10.5762	12.1513	11.0893	15.2725	11.1334	16.7515	12.6988	12.0162	12.4164	12.2234	11.6623	12.1559	12.8572	14.1809
16. S. albens	10.1152	10.6501	12.5284	9.32125	10.8273	11.0863	10.2363	11.9916	9.77749	10.1223	10.4569	10.5076	10.8172	11.7372	10.6474	12.1056	11.5515	10.5181	9.73277	11.2422	10.516	14.0622	10.1863	15.5331	11.7833	11.0875	11.436	11.4536	11.2283	11.26	12.0335	13.4004
17. S. affinis	2.58403	17.5543	16.966	2.88985	2.99794	17.1851	2.81222	17.3632	3.65222	15.6125	3.19115	2.70942	3.50887	17.7317	3.24851	17.433	18.236	16.8058	2.64219	3.84967	16.8466	5.69062	16.7306	3.53191	3.60919	18.2627	3.39455	17.9049	16.4222	16.8515	18.0191	18.9904
18. S. sylvatica	10.8633	7.55547	9.38451	9.78393	10.9773	7.67759	10.4676	9.063	10.8111	7.48069	10.1156	10.5686	11.4822	8.67062	12.6735	8.30856	8.33908	7.87872	10.3652	11.4365	8.24112	15.3538	7.45335	12.5406	12.596	8.27515	12.2754	8.84138	11.0973	8.57861	8.42935	11.3182
19. S. tenuifolia	1.90428	17.4994	17.5837	2.44362	2.50028	17.5257	2.57668	18.3972	3.05014	15.8391	2.67867	2.37801	2.89568	19.1194	3.08659	19.532	18.5959	18.271	2.15563	3.38622	16.3665	5.71965	17.5215	3.03201	3.13797	19.5908	2.88271	19.0278	17.547	16.7457	17.8558	21.1705
1. S. strictiflora	2.27395	16.4571	15.5437	2.51014	2.63691	15.8184	2.65486	16.2522	3.28766	14.3738	2.8251	2.48757	3.18923	16.4385	2.89061	15.8859	17.166	15.4741	2.35148	3.51513	15.5308	4.82884	15.1493	3.17606	3.27596	16.854	3.0979	16.5755	15.254	15.5643	16.7443	17.4943
20. S. floridana	1.91914	16.7763	16.718	2.49522	2.377	16.5483	2.47114	17.6636	3.03319	15.8002	2.63117	2.3676	2.90152	18.4641	2.69986	18.3019	17.9052	17.781	2.08363	3.33096	16.0049	7.85078	16.8052	3.00731	2.87399	18.4858	2.86484	18.3452	17.479	16.4398	18.1822	21.0381
21. P. ambigua	12.7024	12.8951	13.1223	11.9742	13.8759	13.3713	13.0501	13.0059	14.2041	12.598	13.7864	14.064	13.3205	14.0012	14.153	12.8615	13.388	12.577	12.374	13.2255	12.4669	17.1075	13.1154	14.3346	13.4823	12.999	13.3234	13.7211	12.5228	12.6363	12.3705	14.3874
22. P. cf. electra	11.9479	10.9418	12.9992	11.3627	12.1882	12.5327	11.3639	11.9416	13.4044	12.9092	12.4043	12.758	12.7523	14.4229	13.4134	12.6525	12.5111	12.9178	11.6128	12.2877	11.2009	13.2218	12.3567	13.5907	12.6616	12.5263	12.5699	14.0987	11.2769	12.375	11.9737	12.3751
23. P. macrophylla	13.357	13.3719	13.9495	12.5981	14.6767	14.0834	13.7126	13.6746	14.8688	13.6813	14.433	14.4592	13.6376	14.6495	14.8198	13.5512	14.0216	13.2635	13.1873	13.8857	13.1888	17.5014	13.7868	14.7848	13.9725	13.3804	13.8076	14.429	13.8034	13.4614	13.112	14.8972
24. P. racemosa	12.5512	12.5761	14.032	12.0544	13.509	13.4109	12.254	13.2188	16.5881	12.8642	13.2067	13.2034	13.6645	13.3962	14.5669	13.5334	13.8842	12.5421	12.6664	13.1294	12.1319	15.5746	13.4738	14.9403	14.086	13.6726	13.4752	14.2629	16.9652	12.8046	13.2717	14.3671
25. P. stachyoides	13.1283	12.5854	14.5562	12.3821	13.4052	13.9806	12.6688	13.2079	27.0013	13.6853	13.384	14.4777	14.381	14.8885	15.0834	13.3745	14.3694	13.3961	12.5366	13.3963	12.3133	16.0167	13.5212	15.2957	13.9831	14.1528	14.3575	15.2504	13.182	13.7212	13.2576	14.0692
26. P. velutina	12.2915	12.3034	13.1849	11.8656	13.6743	12.8811	12.7932	12.644	13.9777	12.7705	13.3187	13.8778	12.9435	13.5756	13.9322	12.5745	13.0523	12.1014	12.4548	12.9803	12.2473	15.6349	12.8209	13.9076	13.0706	12.7266	12.6231	13.0878	13.0064	12.603	12.1973	13.5436
27. P. vestita	12.7613	12.7264	13.5917	12.4488	14.0947	13.3752	12.8774	13.4243	13.9415	12.7338	13.7102	13.7932	13.317	14.3394	13.9818	13.0928	13.2542	12.4164	12.3603	13.5627	12.5261	14.9804	13.1537	14.6065	13.9117	13.0074	13.3082	13.2413	12.7302	12.8736	12.6359	13.9717
28. P. waimeae	13.4564	11.9373	14.2791	12.4072	12.8797	13.5524	12.4686	12.9239	14.3807	13.9213	13.6121	13.3516	13.5541	15.6048	14.097	13.9259	13.4343	14.7268	12.0078	13.4011	11.6178	17.9122	13.2267	15.0375	13.4555	13.3338	13.6067	15.2828	13.2816	13.3607	12.9136	14.0628
29. P. warshaueri	13.5533	13.6285	14.39	12.8675	14.297	13.8507	13.684	14.626	14.2318	13.4478	17.7447	14.6694	15.3084	15.2717	15.179	14.3069	14.4368	12.8566	14.5133	14.7277	13.7817	25.6293	13.642	15.7932	14.6337	13.7762	13.6072	14.1149	14.5642	13.932	13.2921	16.0647
2. S. albens	10.6389	11.1056	13.1468	9.81053	11.3907	11.632	10.7397	12.5757	10.3168	10.6085	10.9868	11.0388	11.3995	12.2834	11.204	12.7487	12.0828	10.9806	10.2705	11.8071	11.0578	15.7143	10.676	16.1501	12.3988	11.5917	12.0658	11.9986	12.0484	11.8044	12.6285	14.1751
30. P. warshaueri	13.192	13.0048	13.735	12.294	13.6147	13.2745	13.0116	13.9913	13.4444	12.9621	16.9736	13.9337	14.6806	14.481	14.5111	13.4409	13.8037	12.2797	13.8335	13.941	13.1087	23.4558	13.0053	14.8721	14.0219	13.1885	12.9316	13.4096	13.459	13.2088	12.654	15.0671
31. S. bifida	15.0271	14.4491	16.5402	14.1223	15.6878	15.5382	14.9594	15.6996	15.477	14.5013	17.9094	15.3869	15.2028	14.4501	15.5672	15.8737	18.5798	14.2012	13.9191	15.2726	15.0747	20.0064	15.1878	16.7687	15.9284	15.2738	15.5391	15.2704	17.0305	15.399	14.8292	16.0917
32. S. calaminthoides	13.393	13.064	14.2292	13.1791	13.9387	13.9452	13.5811	14.1383	13.4072	13.2513	13.1209	14.1955	13.7827	14.3338	13.654	13.7546	13.9431	13.4468	12.5861	14.516	12.5228	14.7532	13.6377	14.6018	14.0706	13.5449	13.8049	13.9912	13.132	13.6685	13.6981	14.5308
33. S. campanulata	14.057	11.2263	13.6718	11.1258	12.2373	12.7829	12.3269	13.0515	13.4694	12.4961	13.1541	12.4548	13.4166	11.4575	14.3956	13.2591	16.3754	12.6039	11.652	13.049	11.764	15.0692	16.479	13.8717	13.5141	12.4247	12.7682	12.3553	12.4776	12.7798	12.1373	13.341
34. S. cranwelliae	14.4583	14.217	15.8075	14.4255	15.6913	15.5696	14.8277	15.409	14.387	14.86	14.196	15.7304	15.05	15.248	15.2021	15.2629	15.2557	15.0193	13.9595	15.6053	13.8625	17.6143	15.2346	15.8793	15.6901	15.3094	15.3693	15.2418	15.5694	15.3443	15.7201	15.8975
35. S. kealiae	16.1559	13.4244	15.6453	13.0172	14.1789	14.3478	13.9971	14.9982	15.3925	14.3048	15.4193	14.6897	15.0493	13.4929	16.5355	15.1634	19.0629	14.3312	13.331	15.1778	13.6322	17.9347	18.755	15.8619	15.8587	13.9687	14.8321	14.2791	14.8089	14.6653	13.6874	15.5291
36. S. macrantha	12.4994	11.886	12.9821	11.515	12.2233	13.0416	12.4509	12.9184	14.9881	11.9143	12.9094	12.837	13.0204	13.9833	13.123	12.7199	13.2078	12.1106	12.0871	12.4288	11.8329	14.5777	12.1636	13.6203	12.9433	12.331	12.9189	12.8957	12.3028	12.6369	12.5605	13.7674
37. S. macrantha	13.215	13.127	14.3449	13.1934	13.8621	13.9312	13.6096	14.3064	13.6649	13.1587	13.1428	14.291	13.9117	14.2008	13.8147	13.8123	13.9263	13.4611	12.9437	13.2127	13.0146	14.7892	13.6179	14.6	14.4245	13.6466	13.6807	13.765	13.6324	13.5625	13.5901	14.7912
38. S. macrantha	14.794	14.3049	15.7526	14.4796	15.1244	15.2605	14.8996	15.2606	15.0375	14.9867	14.5392	16.0809	15.0096	15.4163	15.1907	15.1065	14.8969	15.1369	14.0339	14.6844	14.0226	16.2227	14.6122	15.9007	15.7009	14.8093	15.0949	14.9086	13.7914	14.9528	15.0105	15.8647
39. S. oxygona	14.4721	14.8291	16.2345	14.4847	15.6576	15.4933	14.5475	15.5465	14.8718	15.2182	15.189	16.4759	15.6679	15.9404	15.6772	14.9931	15.8062	14.63	13.9711	15.6223	13.6881	16.9851	15.1277	16.5741	15.6093	15.4153	15.7555	15.403	15.1701	15.2778	15.6528	16.4735
3. S. chamissonis	14.1947	14.5747	17.3187	13.3159	15.3291	15.091	14.688	15.7637	14.5964	13.9238	14.4309	15.192	14.2225	16.6803	15.0879	16.6764	15.2575	14.8009	13.9794	15.4626	14.0646	22.7639	14.6155	20.7308	16.4723	15.3788	16.5598	15.5665	15.7129	15.5917	16.7619	18.6605
40. S. cf. purpurea	12.655	10.3144	12.2154	10.0181	10.96	11.3719	11.0525	11.4603	12.0972	10.7907	11.5754	11.4354	11.869	10.1446	12.9513	12.2576	14.3382	11.3471	10.3329	11.6406	10.7015	15.9464	15.06	12.5792	12.0652	10.8933	11.4838	11.0414	11.5586	11.3734	10.631	12.9015
41. S. rugosa	12.7769	12.0834	13.554	12.0555	12.8219	13.6675	12.6854	12.8901	13.2267	12.7951	14.0061	13.4124	13.1213	12.3115	12.7932	12.6341	16.0407	12.0591	11.7559	12.9413	12.5113	14.334	12.6566	13.9008	13.4266	12.2642	13.5102	12.8456	12.9387	12.8933	12.4896	12.9029
42. S. rugosa	12.18	11.4477	12.9032	11.0567	12.2908	12.3961	11.9552	12.3925	12.864	11.6802	13.1683	12.8026	12.4601	11.7983	12.3457	12.2587	15.3736	11.6195	11.2198	12.1997	12.1708	13.5304	11.9991	13.0923	12.6584	11.7274	12.679	12.202	12.7217	12.4526	11.9173	12.3392
43. S. scrophularioides	13.0392	12.9059	14.2547	12.9196	13.849	13.6615	13.4772	14.0784	13.4782	13.0533	13.2624	14.2844	13.708	13.7411	13.8381	13.5882	13.5541	13.3614	12.3291	14.6742	12.4835	16.3941	13.7147	14.5022	14.032	13.4171	13.7521	13.6132	12.8778	13.7994	13.3309	14.5602
44. S. scrophularioides	13.4132	13.2413	14.5602	13.1339	13.9803	13.6958	13.6373	13.6778	13.2814	13.2572	13.0071	14.1353	13.752	13.6137	13.8748	13.8218	13.3054	13.8139	12.6832	14.6789	12.7291	17.0838	13.9616	14.3532	14.0359	13.6455	13.8642	13.6858	13.6093	13.9451	13.6231	14.7198
45. S. sessilis	11.9852	11.8334	13.1634	10.9211	12.4894	12.9335	11.9847	12.8376	12.3702	11.9234	11.7811	12.4623	12.444	12.5346	12.858	12.4219	13.4841	12.2239	12.3419	12.7826	11.4949	13.0557	12.393	13.7005	12.8707	12.4925	12.8593	13.0948	11.4792	12.1391	12.3917	12.9728
46. S. microphylla	11.7151	11.0195	12.301	10.7438	12.0806	12.0076	11.6081	12.0126	12.1348	10.8936	13.5634	11.8569	12.0818	11.064	11.8492	11.7273	15.4657	11.2088	11.03	11.3577	11.8466	13.7389	11.0919	12.6933	11.984	11.3743	12.3106	11.7313	13.0517	11.7061	11.4181	12.0505
4. S. bullata	9.92667	10.7492	11.826	9.24203	10.8143	10.3829	10.1839	10.9798	9.98885	9.8676	9.66712	10.479	10.593	11.3073	10.5778	11.2529	10.7385	10.1166	9.35601	10.6963	9.44758	11.9813	10.0951	14.8343	11.3145	10.4192	11.2039	10.6359	9.64252	10.4332	11.5886	11.972
5. S. coccinea	11.0159	3.99694	6.57895	11.0433	12.2441	3.94796	11.2983	5.3627	11.1363	4.05984	12.834	12.4182	12.9867	4.37274	12.6327	4.27148	4.45304	4.28344	11.3403	11.8199	4.3314	16.9343	4.02593	13.9084	13.4675	4.35573	13.5681	4.38145	6.05623	4.15226	5.30425	5.82836
6. S. byzantina	3.06938	3.77844	5.30677	2.83215	3.39192	3.88703	3.01752	4.47059	3.56925	4.05186	3.03951	2.92785	3.51447	4.25706	3.51616	4.46622	4.48363	3.96738	2.74819	3.68335	4.30575	10.9615	4.10302	3.92881	3.79671	4.1227	3.83144	4.42615	6.72559	4.30444	4.00549	5.7231
7. P. floribunda	11.0521	10.1383	11.5498	9.68083	11.0216	11.5601	10.61	10.784	19.3718	11.961	10.9252	11.3997	11.2137	11.9307	12.3539	10.7884	11.4911	10.2615	9.99631	10.9944	9.87231	11.9711	10.8511	12.4249	11.5268	11.4269	11.537	12.6216	10.565	10.7502	10.566	11.3111
8. S. rugosa	16.2075	15.2441	17.0124	14.5217	16.5924	16.2876	15.8888	16.2544	17.039	15.2873	17.2626	16.5698	16.3785	15.4097	16.4262	16.6264	19.8086	15.3197	14.8051	16.5951	15.8556	20.3744	15.8127	17.7969	16.746	15.7626	17.1179	15.8973	16.865	16.3413	16.0657	16.1754
9. S. purpurea	17.965	14.9961	17.0131	14.616	15.7156	16.3412	15.6629	16.8671	17.0667	15.7771	16.878	16.3086	17.2339	14.8771	18.4725	16.8532	20.5224	15.9955	15.4998	16.4398	15.0548	18.2901	21.0171	17.8214	17.9191	15.6101	16.5464	16.2793	15.269	16.1146	15.4586	17.496

## Sheet: S10
Supplementary Table 10: Syntenic links downloaded from CoGe and reformatted for Circos.
Match 1 scaffold	Match 1 start	Match 1 end	Match 2 scaffold	Match 2 start	Match 2 end
HiC_scaffold_1	34576122	34577789	HiC_scaffold_1	34842901	34843927
HiC_scaffold_1	34688461	34692883	HiC_scaffold_1	34858820	34863239
HiC_scaffold_1	34697121	34700714	HiC_scaffold_1	34867185	34870773
HiC_scaffold_1	34701675	34702130	HiC_scaffold_1	34871638	34873483
HiC_scaffold_1	34705723	34707280	HiC_scaffold_1	34875785	34877349
HiC_scaffold_1	34709736	34710017	HiC_scaffold_1	34879963	34880244
HiC_scaffold_1	34727753	34732497	HiC_scaffold_1	34897955	34901740
HiC_scaffold_1	34739612	34742912	HiC_scaffold_1	34909827	34913122
HiC_scaffold_1	34775067	34780531	HiC_scaffold_1	34930836	34936313
HiC_scaffold_1	34787728	34791795	HiC_scaffold_1	34943920	34947505
HiC_scaffold_1	34809651	34811179	HiC_scaffold_1	34958352	34967019
HiC_scaffold_1	34823556	34828242	HiC_scaffold_1	34977801	34982637
HiC_scaffold_1	34835468	34841243	HiC_scaffold_1	34985870	34995898
HiC_scaffold_1	31655841	31656209	HiC_scaffold_1	32403707	32404075
HiC_scaffold_1	31691271	31692375	HiC_scaffold_1	32426536	32427568
HiC_scaffold_1	32134679	32140919	HiC_scaffold_1	32527156	32528316
HiC_scaffold_1	32163231	32163692	HiC_scaffold_1	32552788	32553249
HiC_scaffold_1	32164785	32165096	HiC_scaffold_1	32554200	32554541
HiC_scaffold_1	6156165	6164286	HiC_scaffold_1	6617849	6625568
HiC_scaffold_1	6168880	6169302	HiC_scaffold_1	6630198	6630544
HiC_scaffold_1	6404510	6406719	HiC_scaffold_1	6804306	6805442
HiC_scaffold_1	6734477	6735087	HiC_scaffold_1	7119892	7121198
HiC_scaffold_1	6804306	6805442	HiC_scaffold_1	7145159	7147645
HiC_scaffold_1	18720419	18720899	HiC_scaffold_1	19988326	19989324
HiC_scaffold_1	18817189	18819342	HiC_scaffold_1	20520887	20521881
HiC_scaffold_1	18858370	18862787	HiC_scaffold_1	20898981	20899251
HiC_scaffold_1	19093859	19095399	HiC_scaffold_1	21100470	21101507
HiC_scaffold_1	19722136	19723278	HiC_scaffold_1	21379958	21385784
HiC_scaffold_1	34842901	34843927	HiC_scaffold_1	34576122	34577789
HiC_scaffold_1	34858820	34863239	HiC_scaffold_1	34688461	34692883
HiC_scaffold_1	34867185	34870773	HiC_scaffold_1	34697121	34700714
HiC_scaffold_1	34871638	34873483	HiC_scaffold_1	34701675	34702130
HiC_scaffold_1	34875785	34877349	HiC_scaffold_1	34705723	34707280
HiC_scaffold_1	34879963	34880244	HiC_scaffold_1	34709736	34710017
HiC_scaffold_1	34897955	34901740	HiC_scaffold_1	34727753	34732497
HiC_scaffold_1	34909827	34913122	HiC_scaffold_1	34739612	34742912
HiC_scaffold_1	34930836	34936313	HiC_scaffold_1	34775067	34780531
HiC_scaffold_1	34943920	34947505	HiC_scaffold_1	34787728	34791795
HiC_scaffold_1	34958352	34967019	HiC_scaffold_1	34809651	34811179
HiC_scaffold_1	34977801	34982637	HiC_scaffold_1	34823556	34828242
HiC_scaffold_1	34985870	34995898	HiC_scaffold_1	34835468	34841243
HiC_scaffold_1	32403707	32404075	HiC_scaffold_1	31655841	31656209
HiC_scaffold_1	32426536	32427568	HiC_scaffold_1	31691271	31692375
HiC_scaffold_1	32527156	32528316	HiC_scaffold_1	32134679	32140919
HiC_scaffold_1	32552788	32553249	HiC_scaffold_1	32163231	32163692
HiC_scaffold_1	32554200	32554541	HiC_scaffold_1	32164785	32165096
HiC_scaffold_1	6617849	6625568	HiC_scaffold_1	6156165	6164286
HiC_scaffold_1	6630198	6630544	HiC_scaffold_1	6168880	6169302
HiC_scaffold_1	6804306	6805442	HiC_scaffold_1	6404510	6406719
HiC_scaffold_1	7119892	7121198	HiC_scaffold_1	6734477	6735087
HiC_scaffold_1	7145159	7147645	HiC_scaffold_1	6804306	6805442
HiC_scaffold_1	19988326	19989324	HiC_scaffold_1	18720419	18720899
HiC_scaffold_1	20520887	20521881	HiC_scaffold_1	18817189	18819342
HiC_scaffold_1	20898981	20899251	HiC_scaffold_1	18858370	18862787
HiC_scaffold_1	21100470	21101507	HiC_scaffold_1	19093859	19095399
HiC_scaffold_1	21379958	21385784	HiC_scaffold_1	19722136	19723278
HiC_scaffold_1	17539757	17542293	HiC_scaffold_10	700267	703400
HiC_scaffold_1	17820427	17822379	HiC_scaffold_10	1178061	1178570
HiC_scaffold_1	17918925	17919736	HiC_scaffold_10	1356031	1357422
HiC_scaffold_1	18522258	18522842	HiC_scaffold_10	1608786	1609326
HiC_scaffold_1	18817189	18819342	HiC_scaffold_10	1800602	1801738
HiC_scaffold_1	17820427	17822379	HiC_scaffold_10	8101695	8102375
HiC_scaffold_1	18396555	18397292	HiC_scaffold_10	7955047	7955940
HiC_scaffold_1	18720419	18720899	HiC_scaffold_10	7837216	7839179
HiC_scaffold_1	18817189	18819342	HiC_scaffold_10	7470275	7471763
HiC_scaffold_1	19587612	19590473	HiC_scaffold_10	7220967	7221253
HiC_scaffold_1	32847149	32849024	HiC_scaffold_14	6744797	6746006
HiC_scaffold_1	32897698	32901553	HiC_scaffold_14	6947258	6949465
HiC_scaffold_1	32937610	32942319	HiC_scaffold_14	7220428	7223817
HiC_scaffold_1	32955270	32957831	HiC_scaffold_14	7231159	7233470
HiC_scaffold_1	33025014	33033308	HiC_scaffold_14	7304794	7312315
HiC_scaffold_1	33110641	33115529	HiC_scaffold_14	7371732	7377755
HiC_scaffold_1	33225069	33228873	HiC_scaffold_14	7838943	7843920
HiC_scaffold_1	33266779	33268382	HiC_scaffold_14	8063321	8065254
HiC_scaffold_1	33404084	33405913	HiC_scaffold_14	8497708	8499301
HiC_scaffold_1	16134703	16135243	HiC_scaffold_15	12871662	12872504
HiC_scaffold_1	16297104	16299044	HiC_scaffold_15	13236902	13237905
HiC_scaffold_1	16568206	16569499	HiC_scaffold_15	13500200	13501810
HiC_scaffold_1	16929005	16929845	HiC_scaffold_15	13590084	13592355
HiC_scaffold_1	17010328	17012143	HiC_scaffold_15	14040079	14040579
HiC_scaffold_1	17280188	17282305	HiC_scaffold_15	14677347	14679901
HiC_scaffold_1	32897698	32901553	HiC_scaffold_16	14317529	14319746
HiC_scaffold_1	32937610	32942319	HiC_scaffold_16	14491673	14499894
HiC_scaffold_1	32955270	32957831	HiC_scaffold_16	14511605	14513932
HiC_scaffold_1	33025014	33033308	HiC_scaffold_16	14551148	14559248
HiC_scaffold_1	33110641	33115529	HiC_scaffold_16	14611409	14617460
HiC_scaffold_1	33225069	33228873	HiC_scaffold_16	14853245	14859366
HiC_scaffold_1	33266779	33268382	HiC_scaffold_16	15428956	15430845
HiC_scaffold_1	33390997	33396454	HiC_scaffold_16	15717734	15725567
HiC_scaffold_1	33782552	33782962	HiC_scaffold_16	13630649	13631164
HiC_scaffold_1	33840133	33842176	HiC_scaffold_16	13590444	13591419
HiC_scaffold_1	34002824	34009277	HiC_scaffold_16	13351658	13357290
HiC_scaffold_1	34090129	34091497	HiC_scaffold_16	13167460	13170863
HiC_scaffold_1	34179368	34180180	HiC_scaffold_16	12973598	12974257
HiC_scaffold_1	34207740	34210044	HiC_scaffold_16	12945097	12950033
HiC_scaffold_1	34321296	34322764	HiC_scaffold_16	12792932	12794241
HiC_scaffold_1	34509629	34512051	HiC_scaffold_16	12639269	12640548
HiC_scaffold_1	15930383	15931337	HiC_scaffold_20	14670791	14671219
HiC_scaffold_1	16297104	16299044	HiC_scaffold_20	14947964	14948995
HiC_scaffold_1	16568206	16569499	HiC_scaffold_20	15488866	15489770
HiC_scaffold_1	17010328	17012143	HiC_scaffold_20	15665307	15668979
HiC_scaffold_1	17280188	17282305	HiC_scaffold_20	15931632	15932960
HiC_scaffold_1	32897698	32901553	HiC_scaffold_28	2559377	2562233
HiC_scaffold_1	33110641	33115529	HiC_scaffold_28	2784259	2794064
HiC_scaffold_1	33266779	33268382	HiC_scaffold_28	2806049	2808494
HiC_scaffold_1	33404084	33405913	HiC_scaffold_28	2820574	2830663
HiC_scaffold_1	33541487	33543766	HiC_scaffold_28	3075594	3079024
HiC_scaffold_1	10809047	10809508	HiC_scaffold_3	24938987	24939682
HiC_scaffold_1	11085469	11087976	HiC_scaffold_3	25743594	25745816
HiC_scaffold_1	11251140	11251760	HiC_scaffold_3	26101058	26102653
HiC_scaffold_1	11432687	11434406	HiC_scaffold_3	26640615	26642768
HiC_scaffold_1	11700099	11700819	HiC_scaffold_3	26820685	26822243
HiC_scaffold_1	29449254	29453903	HiC_scaffold_31	9097341	9102215
HiC_scaffold_1	29702666	29703775	HiC_scaffold_31	8924739	8925827
HiC_scaffold_1	29876871	29878046	HiC_scaffold_31	8916829	8918154
HiC_scaffold_1	30056414	30059197	HiC_scaffold_31	8577647	8578166
HiC_scaffold_1	30070373	30071733	HiC_scaffold_31	8432615	8433922
HiC_scaffold_1	16297104	16299044	HiC_scaffold_38	7470680	7472089
HiC_scaffold_1	16568206	16569499	HiC_scaffold_38	7568090	7568890
HiC_scaffold_1	17010328	17012143	HiC_scaffold_38	7838036	7839985
HiC_scaffold_1	17460075	17461067	HiC_scaffold_38	8190019	8190337
HiC_scaffold_1	17918925	17919736	HiC_scaffold_38	8550442	8551777
HiC_scaffold_1	25895434	25904332	HiC_scaffold_41	42979335	42985798
HiC_scaffold_1	25917315	25922758	HiC_scaffold_41	43036855	43040607
HiC_scaffold_1	25939894	25945967	HiC_scaffold_41	43048233	43055736
HiC_scaffold_1	26269055	26273500	HiC_scaffold_41	43087962	43091763
HiC_scaffold_1	26274862	26278768	HiC_scaffold_41	43093169	43098546
HiC_scaffold_1	26281008	26289442	HiC_scaffold_41	43100816	43107290
HiC_scaffold_1	26335207	26340847	HiC_scaffold_41	43148412	43153065
HiC_scaffold_1	26427790	26431365	HiC_scaffold_41	43179789	43182345
HiC_scaffold_1	26478191	26480133	HiC_scaffold_41	43202282	43204124
HiC_scaffold_1	26481065	26481292	HiC_scaffold_41	43205092	43205361
HiC_scaffold_1	26486219	26488889	HiC_scaffold_41	43209663	43212475
HiC_scaffold_1	26508742	26511409	HiC_scaffold_41	43224332	43226951
HiC_scaffold_1	26516350	26518488	HiC_scaffold_41	43230985	43233965
HiC_scaffold_1	26529287	26535100	HiC_scaffold_41	43253833	43259610
HiC_scaffold_1	26538648	26539774	HiC_scaffold_41	43263186	43264772
HiC_scaffold_1	26579281	26586563	HiC_scaffold_41	43275697	43282442
HiC_scaffold_1	26594622	26594981	HiC_scaffold_41	43297739	43298305
HiC_scaffold_1	26608586	26613789	HiC_scaffold_41	43317740	43322918
HiC_scaffold_1	26627410	26634114	HiC_scaffold_41	43343251	43349023
HiC_scaffold_1	26640681	26641273	HiC_scaffold_41	43360986	43361369
HiC_scaffold_1	26973498	26973782	HiC_scaffold_41	43407826	43408007
HiC_scaffold_1	27019830	27020525	HiC_scaffold_41	43431491	43432180
HiC_scaffold_1	27339717	27340307	HiC_scaffold_41	43529934	43530527
HiC_scaffold_1	27801117	27801992	HiC_scaffold_41	43613954	43614928
HiC_scaffold_1	28227443	28229279	HiC_scaffold_41	43684191	43687583
HiC_scaffold_1	4749732	4754230	HiC_scaffold_41	47460255	47466347
HiC_scaffold_1	5223795	5225949	HiC_scaffold_41	47531769	47533877
HiC_scaffold_1	5357549	5358340	HiC_scaffold_41	47563152	47564930
HiC_scaffold_1	5390124	5395420	HiC_scaffold_41	47673419	47678519
HiC_scaffold_1	5509467	5514669	HiC_scaffold_41	47692180	47697345
HiC_scaffold_1	5534586	5536446	HiC_scaffold_41	47706595	47708697
HiC_scaffold_1	5565090	5570785	HiC_scaffold_41	47726844	47730754
HiC_scaffold_1	5595801	5602290	HiC_scaffold_41	47751017	47757103
HiC_scaffold_1	5615589	5620176	HiC_scaffold_41	47762174	47767011
HiC_scaffold_1	5671972	5674094	HiC_scaffold_41	47773340	47775116
HiC_scaffold_1	5937259	5942985	HiC_scaffold_41	47845099	47847903
HiC_scaffold_1	5954087	5957439	HiC_scaffold_41	47867528	47870795
HiC_scaffold_1	5993469	6002593	HiC_scaffold_41	47887575	47896958
HiC_scaffold_1	6023082	6025147	HiC_scaffold_41	47926395	47928401
HiC_scaffold_1	6075612	6095411	HiC_scaffold_41	47957754	47976700
HiC_scaffold_1	6120289	6127293	HiC_scaffold_41	47986647	47988480
HiC_scaffold_1	6128626	6128969	HiC_scaffold_41	48000694	48001810
HiC_scaffold_1	6143072	6146382	HiC_scaffold_41	48006814	48009989
HiC_scaffold_1	6156165	6164286	HiC_scaffold_41	48015767	48023442
HiC_scaffold_1	6302412	6305045	HiC_scaffold_41	48105631	48106934
HiC_scaffold_1	3285496	3287848	HiC_scaffold_41	48679981	48681304
HiC_scaffold_1	3360258	3360953	HiC_scaffold_41	48696116	48696781
HiC_scaffold_1	3361036	3365199	HiC_scaffold_41	48698281	48700503
HiC_scaffold_1	3367371	3370280	HiC_scaffold_41	48702574	48707433
HiC_scaffold_1	3425127	3496248	HiC_scaffold_41	48726981	48740080
HiC_scaffold_1	3539815	3540192	HiC_scaffold_41	48741198	48741521
HiC_scaffold_1	3621073	3621888	HiC_scaffold_41	48793692	48794900
HiC_scaffold_1	3672230	3673611	HiC_scaffold_41	48799303	48800544
HiC_scaffold_1	3762981	3767114	HiC_scaffold_41	48818116	48821921
HiC_scaffold_1	3767828	3771748	HiC_scaffold_41	48824522	48825709
HiC_scaffold_1	3964326	3964579	HiC_scaffold_41	48833089	48833487
HiC_scaffold_1	3969412	3970432	HiC_scaffold_41	48835145	48837699
HiC_scaffold_1	3971070	3971324	HiC_scaffold_41	48841342	48842737
HiC_scaffold_1	4157491	4157748	HiC_scaffold_41	48888618	48888953
HiC_scaffold_1	4252946	4262107	HiC_scaffold_41	48972699	48981441
HiC_scaffold_1	4749732	4754230	HiC_scaffold_41	49207933	49211545
HiC_scaffold_1	34027171	34030123	HiC_scaffold_41	39969490	39972426
HiC_scaffold_1	34030245	34032210	HiC_scaffold_41	39972566	39973659
HiC_scaffold_1	34032425	34033747	HiC_scaffold_41	39974691	39976032
HiC_scaffold_1	34034818	34038069	HiC_scaffold_41	39977023	39980072
HiC_scaffold_1	34041920	34044582	HiC_scaffold_41	39982072	39984972
HiC_scaffold_1	34046071	34055116	HiC_scaffold_41	39986629	39995576
HiC_scaffold_1	34056770	34057129	HiC_scaffold_41	39997673	39998032
HiC_scaffold_1	34079322	34085360	HiC_scaffold_41	40008427	40014326
HiC_scaffold_1	34097533	34099902	HiC_scaffold_41	40022645	40029613
HiC_scaffold_1	34101130	34102611	HiC_scaffold_41	40031052	40032443
HiC_scaffold_1	34108949	34110287	HiC_scaffold_41	40055487	40056689
HiC_scaffold_1	34118824	34126474	HiC_scaffold_41	40062144	40068830
HiC_scaffold_1	34128121	34130805	HiC_scaffold_41	40076545	40079191
HiC_scaffold_1	34134501	34135106	HiC_scaffold_41	40082663	40083225
HiC_scaffold_1	35199174	35205821	HiC_scaffold_41	38913077	38916134
HiC_scaffold_1	35218056	35223676	HiC_scaffold_41	38916473	38932143
HiC_scaffold_1	35226261	35228356	HiC_scaffold_41	38932168	38934268
HiC_scaffold_1	35232797	35244863	HiC_scaffold_41	38938998	38949877
HiC_scaffold_1	35266415	35266840	HiC_scaffold_41	38961451	38961885
HiC_scaffold_1	35267593	35270469	HiC_scaffold_41	38997730	38998964
HiC_scaffold_1	35291394	35292584	HiC_scaffold_41	39008963	39010145
HiC_scaffold_1	35292853	35296230	HiC_scaffold_41	39010414	39013823
HiC_scaffold_1	35303972	35305158	HiC_scaffold_41	39022047	39023046
HiC_scaffold_1	28640010	28640941	HiC_scaffold_41	43688893	43689177
HiC_scaffold_1	28673247	28675913	HiC_scaffold_41	43710647	43713266
HiC_scaffold_1	28802173	28805980	HiC_scaffold_41	43771284	43775074
HiC_scaffold_1	28808290	28808849	HiC_scaffold_41	43777201	43777760
HiC_scaffold_1	28809171	28822056	HiC_scaffold_41	43778020	43788294
HiC_scaffold_1	28892250	28900582	HiC_scaffold_41	43809893	43819822
HiC_scaffold_1	28999925	29004015	HiC_scaffold_41	43823451	43829527
HiC_scaffold_1	29005809	29010064	HiC_scaffold_41	43831406	43835371
HiC_scaffold_1	29055727	29056044	HiC_scaffold_41	43852629	43852946
HiC_scaffold_1	24982411	24984200	HiC_scaffold_41	44055875	44056902
HiC_scaffold_1	24984774	24985986	HiC_scaffold_41	44057370	44058941
HiC_scaffold_1	25079585	25081187	HiC_scaffold_41	44065461	44067047
HiC_scaffold_1	25096499	25098069	HiC_scaffold_41	44071337	44075515
HiC_scaffold_1	25108858	25119320	HiC_scaffold_41	44090807	44094688
HiC_scaffold_1	25124500	25124769	HiC_scaffold_41	44099038	44099307
HiC_scaffold_1	25140278	25140520	HiC_scaffold_41	44116307	44117695
HiC_scaffold_1	25364060	25370431	HiC_scaffold_41	44157731	44163592
HiC_scaffold_1	25381225	25387838	HiC_scaffold_41	44241813	44247748
HiC_scaffold_1	10297088	10298547	HiC_scaffold_41	47306380	47307072
HiC_scaffold_1	10320615	10323889	HiC_scaffold_41	47307577	47312046
HiC_scaffold_1	10602511	10617578	HiC_scaffold_41	47386197	47391798
HiC_scaffold_1	10626785	10635542	HiC_scaffold_41	47400232	47408819
HiC_scaffold_1	10637438	10638682	HiC_scaffold_41	47410298	47411545
HiC_scaffold_1	10700615	10704314	HiC_scaffold_41	47430397	47434077
HiC_scaffold_1	10736737	10743489	HiC_scaffold_41	47442006	47449243
HiC_scaffold_1	10751866	10752192	HiC_scaffold_41	47460255	47466347
HiC_scaffold_1	1307656	1310909	HiC_scaffold_41	49759998	49763252
HiC_scaffold_1	1328765	1330144	HiC_scaffold_41	49850250	49854008
HiC_scaffold_1	1410965	1413729	HiC_scaffold_41	49875847	49878448
HiC_scaffold_1	1418394	1420451	HiC_scaffold_41	50034407	50036485
HiC_scaffold_1	1437189	1437752	HiC_scaffold_41	50043027	50050885
HiC_scaffold_1	1464884	1471067	HiC_scaffold_41	50057376	50063284
HiC_scaffold_1	1773748	1794788	HiC_scaffold_41	50149385	50151232
HiC_scaffold_1	35218056	35223676	HiC_scaffold_41	39084579	39085711
HiC_scaffold_1	35226261	35228356	HiC_scaffold_41	39089091	39094297
HiC_scaffold_1	35232797	35244863	HiC_scaffold_41	39095092	39106012
HiC_scaffold_1	35266415	35266840	HiC_scaffold_41	39117577	39118011
HiC_scaffold_1	35267593	35270469	HiC_scaffold_41	39119052	39119815
HiC_scaffold_1	35303972	35305158	HiC_scaffold_41	39206656	39207754
HiC_scaffold_1	32246860	32249914	HiC_scaffold_41	41702692	41713793
HiC_scaffold_1	32268495	32270510	HiC_scaffold_41	41761658	41763986
HiC_scaffold_1	32313714	32317119	HiC_scaffold_41	41789707	41792963
HiC_scaffold_1	32337431	32338327	HiC_scaffold_41	41803512	41804408
HiC_scaffold_1	32342035	32342520	HiC_scaffold_41	41807146	41808503
HiC_scaffold_1	32350016	32350276	HiC_scaffold_41	41812434	41815893
HiC_scaffold_1	24511919	24512412	HiC_scaffold_41	44376173	44376722
HiC_scaffold_1	24523544	24530340	HiC_scaffold_41	44523392	44529951
HiC_scaffold_1	24534238	24534756	HiC_scaffold_41	44532287	44532805
HiC_scaffold_1	24560252	24566745	HiC_scaffold_41	44540552	44546158
HiC_scaffold_1	24733326	24733790	HiC_scaffold_41	44717371	44717901
HiC_scaffold_1	24470139	24474641	HiC_scaffold_41	44607178	44611566
HiC_scaffold_1	24511919	24512412	HiC_scaffold_41	44717371	44717901
HiC_scaffold_1	24523544	24530340	HiC_scaffold_41	44727805	44734362
HiC_scaffold_1	24534238	24534756	HiC_scaffold_41	44736706	44737224
HiC_scaffold_1	24560252	24566745	HiC_scaffold_41	44744954	44748757
HiC_scaffold_1	16117699	16121249	HiC_scaffold_41	45947828	45951286
HiC_scaffold_1	16189855	16194303	HiC_scaffold_41	45960850	45965168
HiC_scaffold_1	16229534	16230274	HiC_scaffold_41	45971344	45973915
HiC_scaffold_1	16384985	16419016	HiC_scaffold_41	45990061	46009369
HiC_scaffold_1	16431670	16435902	HiC_scaffold_41	46013564	46017293
HiC_scaffold_1	7814726	7816612	HiC_scaffold_41	48123986	48130907
HiC_scaffold_1	8064745	8071275	HiC_scaffold_41	48177084	48183282
HiC_scaffold_1	8075883	8077592	HiC_scaffold_41	48186788	48188366
HiC_scaffold_1	8077597	8083453	HiC_scaffold_41	48188716	48193914
HiC_scaffold_1	8085355	8103749	HiC_scaffold_41	48195471	48217398
HiC_scaffold_1	8811597	8812917	HiC_scaffold_41	49571452	49571850
HiC_scaffold_1	9018242	9022276	HiC_scaffold_41	49639541	49640059
HiC_scaffold_1	9050786	9052815	HiC_scaffold_41	49688942	49692282
HiC_scaffold_1	9201747	9205706	HiC_scaffold_41	49703868	49706084
HiC_scaffold_1	9377244	9378014	HiC_scaffold_41	49850250	49854008
HiC_scaffold_1	31911022	31913687	HiC_scaffold_41	41858581	41860985
HiC_scaffold_1	31930622	31933043	HiC_scaffold_41	41849592	41852001
HiC_scaffold_1	31964289	31967648	HiC_scaffold_41	41835856	41840689
HiC_scaffold_1	32011792	32013499	HiC_scaffold_41	41807146	41808503
HiC_scaffold_1	32016187	32017083	HiC_scaffold_41	41803512	41804408
HiC_scaffold_1	32313714	32317119	HiC_scaffold_41	41789707	41792963
HiC_scaffold_1	32454416	32456453	HiC_scaffold_41	41764823	41765341
HiC_scaffold_1	32477704	32480423	HiC_scaffold_41	41702692	41713793
HiC_scaffold_1	32574429	32578502	HiC_scaffold_41	41690528	41694152
HiC_scaffold_1	32618365	32622829	HiC_scaffold_41	41667402	41673314
HiC_scaffold_1	32670097	32670687	HiC_scaffold_41	41642919	41643467
HiC_scaffold_1	32677495	32678394	HiC_scaffold_41	41635004	41637303
HiC_scaffold_1	32681004	32682662	HiC_scaffold_41	41631012	41633096
HiC_scaffold_1	32734609	32735322	HiC_scaffold_41	41581606	41582316
HiC_scaffold_1	32742980	32743414	HiC_scaffold_41	41577263	41577697
HiC_scaffold_1	32745295	32750911	HiC_scaffold_41	41567549	41576016
HiC_scaffold_1	32786070	32791383	HiC_scaffold_41	41556910	41561829
HiC_scaffold_1	32801689	32803052	HiC_scaffold_41	41539572	41541050
HiC_scaffold_1	32840064	32843376	HiC_scaffold_41	41492262	41494674
HiC_scaffold_1	32847149	32849024	HiC_scaffold_41	41485811	41487677
HiC_scaffold_1	32861004	32861787	HiC_scaffold_41	41481698	41482759
HiC_scaffold_1	32871631	32873315	HiC_scaffold_41	41436127	41437803
HiC_scaffold_1	32873770	32877833	HiC_scaffold_41	41432595	41435686
HiC_scaffold_1	32886560	32889964	HiC_scaffold_41	41417521	41420723
HiC_scaffold_1	32892474	32892875	HiC_scaffold_41	41413910	41416176
HiC_scaffold_1	32897698	32901553	HiC_scaffold_41	41407154	41411038
HiC_scaffold_1	32930563	32933091	HiC_scaffold_41	41331613	41334141
HiC_scaffold_1	32955270	32957831	HiC_scaffold_41	41318198	41320627
HiC_scaffold_1	32966762	32969708	HiC_scaffold_41	41309005	41318054
HiC_scaffold_1	32997384	33001771	HiC_scaffold_41	41276411	41280672
HiC_scaffold_1	33025014	33033308	HiC_scaffold_41	41257181	41262435
HiC_scaffold_1	33037422	33037655	HiC_scaffold_41	41250768	41251311
HiC_scaffold_1	33040118	33042211	HiC_scaffold_41	41245429	41247501
HiC_scaffold_1	33060007	33061137	HiC_scaffold_41	41241326	41242453
HiC_scaffold_1	33102578	33109741	HiC_scaffold_41	41230569	41234352
HiC_scaffold_1	33110641	33115529	HiC_scaffold_41	41228242	41229640
HiC_scaffold_1	33189228	33191744	HiC_scaffold_41	41219138	41221572
HiC_scaffold_1	33208867	33209880	HiC_scaffold_41	41207201	41208214
HiC_scaffold_1	33225069	33228873	HiC_scaffold_41	41160696	41164354
HiC_scaffold_1	33229660	33231094	HiC_scaffold_41	41148040	41156943
HiC_scaffold_1	33239781	33240351	HiC_scaffold_41	41144541	41145200
HiC_scaffold_1	33261513	33264112	HiC_scaffold_41	41016728	41022977
HiC_scaffold_1	33266779	33268382	HiC_scaffold_41	41012374	41013941
HiC_scaffold_1	33286535	33287946	HiC_scaffold_41	40981730	40983003
HiC_scaffold_1	33289826	33296044	HiC_scaffold_41	40975194	40977948
HiC_scaffold_1	33296777	33299865	HiC_scaffold_41	40968306	40971427
HiC_scaffold_1	33314902	33321044	HiC_scaffold_41	40949211	40955318
HiC_scaffold_1	33359582	33362251	HiC_scaffold_41	40897790	40901455
HiC_scaffold_1	33390997	33396454	HiC_scaffold_41	40874959	40879364
HiC_scaffold_1	33404084	33405913	HiC_scaffold_41	40867061	40869024
HiC_scaffold_1	33428004	33428471	HiC_scaffold_41	40838497	40838832
HiC_scaffold_1	33433027	33435196	HiC_scaffold_41	40832993	40835072
HiC_scaffold_1	33436383	33439177	HiC_scaffold_41	40828091	40831634
HiC_scaffold_1	33439858	33446043	HiC_scaffold_41	40821856	40828032
HiC_scaffold_1	33487683	33489010	HiC_scaffold_41	40758349	40759678
HiC_scaffold_1	33541487	33543766	HiC_scaffold_41	40728036	40742348
HiC_scaffold_1	33659826	33664389	HiC_scaffold_41	40712281	40713081
HiC_scaffold_1	33665765	33667641	HiC_scaffold_41	40700927	40702878
HiC_scaffold_1	33675622	33681570	HiC_scaffold_41	40612215	40615425
HiC_scaffold_1	33782552	33782962	HiC_scaffold_41	40406560	40406964
HiC_scaffold_1	33797705	33800658	HiC_scaffold_41	40385284	40388129
HiC_scaffold_1	33810435	33810845	HiC_scaffold_41	40383437	40384532
HiC_scaffold_1	33821561	33822553	HiC_scaffold_41	40377202	40378221
HiC_scaffold_1	33828229	33828795	HiC_scaffold_41	40374414	40374980
HiC_scaffold_1	33868702	33869013	HiC_scaffold_41	40355598	40355909
HiC_scaffold_1	33878739	33881092	HiC_scaffold_41	40348615	40350982
HiC_scaffold_1	33885914	33888661	HiC_scaffold_41	40343284	40345176
HiC_scaffold_1	33904726	33907073	HiC_scaffold_41	40331332	40332929
HiC_scaffold_1	33916882	33917657	HiC_scaffold_41	40301073	40302457
HiC_scaffold_1	33927428	33934445	HiC_scaffold_41	40181054	40188073
HiC_scaffold_1	33935756	33938672	HiC_scaffold_41	40176764	40179679
HiC_scaffold_1	33940476	33946796	HiC_scaffold_41	40168593	40175002
HiC_scaffold_1	33959633	33961187	HiC_scaffold_41	40141490	40143137
HiC_scaffold_1	33988204	33994690	HiC_scaffold_41	40119922	40126214
HiC_scaffold_1	33996264	34000639	HiC_scaffold_41	40113957	40118351
HiC_scaffold_1	34002824	34009277	HiC_scaffold_41	40106443	40111271
HiC_scaffold_1	34020143	34026238	HiC_scaffold_41	40093361	40099484
HiC_scaffold_1	34090129	34091497	HiC_scaffold_41	40022645	40029613
HiC_scaffold_1	34151687	34152904	HiC_scaffold_41	39964656	39965873
HiC_scaffold_1	34170841	34171414	HiC_scaffold_41	39915514	39916122
HiC_scaffold_1	34207740	34210044	HiC_scaffold_41	39899815	39902044
HiC_scaffold_1	34221736	34226754	HiC_scaffold_41	39885374	39890057
HiC_scaffold_1	34298273	34298566	HiC_scaffold_41	39864801	39865094
HiC_scaffold_1	34303690	34305648	HiC_scaffold_41	39856541	39858405
HiC_scaffold_1	34321296	34322764	HiC_scaffold_41	39849235	39851339
HiC_scaffold_1	34412794	34417965	HiC_scaffold_41	39800655	39805803
HiC_scaffold_1	34418698	34421526	HiC_scaffold_41	39797167	39799959
HiC_scaffold_1	34425072	34425410	HiC_scaffold_41	39792777	39793070
HiC_scaffold_1	34427204	34427683	HiC_scaffold_41	39788636	39789118
HiC_scaffold_1	34459264	34462432	HiC_scaffold_41	39749764	39752754
HiC_scaffold_1	34494946	34495302	HiC_scaffold_41	39738010	39738369
HiC_scaffold_1	34509629	34512051	HiC_scaffold_41	39715868	39718310
HiC_scaffold_1	34567819	34570454	HiC_scaffold_41	39690211	39692571
HiC_scaffold_1	34576122	34577789	HiC_scaffold_41	39640055	39641626
HiC_scaffold_1	34697121	34700714	HiC_scaffold_41	39616524	39620145
HiC_scaffold_1	34871638	34873483	HiC_scaffold_41	39613611	39615614
HiC_scaffold_1	34875785	34877349	HiC_scaffold_41	39607998	39609878
HiC_scaffold_1	34897955	34901740	HiC_scaffold_41	39599206	39601426
HiC_scaffold_1	34909827	34913122	HiC_scaffold_41	39593543	39597032
HiC_scaffold_1	34930836	34936313	HiC_scaffold_41	39588279	39590413
HiC_scaffold_1	34943920	34947505	HiC_scaffold_41	39575145	39579530
HiC_scaffold_1	34958352	34967019	HiC_scaffold_41	39561014	39569848
HiC_scaffold_1	34977801	34982637	HiC_scaffold_41	39549097	39554370
HiC_scaffold_1	34985870	34995898	HiC_scaffold_41	39541608	39546489
HiC_scaffold_1	35001285	35003656	HiC_scaffold_41	39525506	39526448
HiC_scaffold_1	35013337	35019855	HiC_scaffold_41	39500355	39506921
HiC_scaffold_1	35020689	35025697	HiC_scaffold_41	39495864	39499536
HiC_scaffold_1	35058050	35065234	HiC_scaffold_41	39478478	39484030
HiC_scaffold_1	35070380	35076671	HiC_scaffold_41	39467575	39474772
HiC_scaffold_1	35089408	35090699	HiC_scaffold_41	39440536	39442910
HiC_scaffold_1	35091619	35095149	HiC_scaffold_41	39409056	39412147
HiC_scaffold_1	35107196	35109385	HiC_scaffold_41	39395874	39397990
HiC_scaffold_1	35110264	35112493	HiC_scaffold_41	39392228	39394867
HiC_scaffold_1	35117592	35123958	HiC_scaffold_41	39380556	39387352
HiC_scaffold_1	35266415	35266840	HiC_scaffold_41	39117577	39118011
HiC_scaffold_1	35303972	35305158	HiC_scaffold_41	39022047	39023046
HiC_scaffold_1	29326047	29337410	HiC_scaffold_41	42964095	42966358
HiC_scaffold_1	29449254	29453903	HiC_scaffold_41	42858439	42863237
HiC_scaffold_1	29474369	29479543	HiC_scaffold_41	42842820	42846143
HiC_scaffold_1	29485564	29490354	HiC_scaffold_41	42832939	42841386
HiC_scaffold_1	29540188	29540757	HiC_scaffold_41	42821356	42821928
HiC_scaffold_1	29566763	29571302	HiC_scaffold_41	42783910	42788030
HiC_scaffold_1	29573968	29578336	HiC_scaffold_41	42762082	42778207
HiC_scaffold_1	29602672	29604326	HiC_scaffold_41	42755000	42756678
HiC_scaffold_1	29625411	29638953	HiC_scaffold_41	42739166	42752855
HiC_scaffold_1	29643412	29643900	HiC_scaffold_41	42735037	42737522
HiC_scaffold_1	29656148	29657179	HiC_scaffold_41	42726932	42727963
HiC_scaffold_1	29789121	29799564	HiC_scaffold_41	42666286	42669051
HiC_scaffold_1	29801809	29802075	HiC_scaffold_41	42662331	42662597
HiC_scaffold_1	29825047	29831965	HiC_scaffold_41	42651148	42658344
HiC_scaffold_1	29876871	29878046	HiC_scaffold_41	42645253	42646446
HiC_scaffold_1	29887288	29889409	HiC_scaffold_41	42640463	42642581
HiC_scaffold_1	29893625	29898152	HiC_scaffold_41	42633819	42638342
HiC_scaffold_1	29898265	29898633	HiC_scaffold_41	42633136	42633706
HiC_scaffold_1	29899177	29900743	HiC_scaffold_41	42631291	42632816
HiC_scaffold_1	30050216	30054641	HiC_scaffold_41	42597114	42601604
HiC_scaffold_1	30056414	30059197	HiC_scaffold_41	42593378	42594465
HiC_scaffold_1	30070373	30071733	HiC_scaffold_41	42581483	42582589
HiC_scaffold_1	30155806	30159523	HiC_scaffold_41	42562866	42564863
HiC_scaffold_1	30161685	30162769	HiC_scaffold_41	42559303	42560551
HiC_scaffold_1	30217919	30218953	HiC_scaffold_41	42497750	42499143
HiC_scaffold_1	30243376	30248408	HiC_scaffold_41	42478786	42483652
HiC_scaffold_1	30253116	30253565	HiC_scaffold_41	42474461	42474922
HiC_scaffold_1	30280276	30281904	HiC_scaffold_41	42466870	42473193
HiC_scaffold_1	30286471	30288603	HiC_scaffold_41	42457059	42460079
HiC_scaffold_1	30305350	30306731	HiC_scaffold_41	42429829	42430821
HiC_scaffold_1	30345152	30348109	HiC_scaffold_41	42415413	42417520
HiC_scaffold_1	30350527	30356677	HiC_scaffold_41	42406035	42412153
HiC_scaffold_1	30357485	30357784	HiC_scaffold_41	42404940	42405233
HiC_scaffold_1	30395106	30401473	HiC_scaffold_41	42394288	42398246
HiC_scaffold_1	30424406	30425383	HiC_scaffold_41	42381758	42383832
HiC_scaffold_1	30426134	30432393	HiC_scaffold_41	42374833	42381314
HiC_scaffold_1	30464109	30470214	HiC_scaffold_41	42349847	42352345
HiC_scaffold_1	30575986	30577680	HiC_scaffold_41	42303764	42305602
HiC_scaffold_1	30579115	30580023	HiC_scaffold_41	42301658	42302524
HiC_scaffold_1	30586390	30588982	HiC_scaffold_41	42293353	42296377
HiC_scaffold_1	30698981	30700228	HiC_scaffold_41	42274846	42276093
HiC_scaffold_1	30703856	30708978	HiC_scaffold_41	42267179	42269844
HiC_scaffold_1	30817807	30821378	HiC_scaffold_41	42211904	42215559
HiC_scaffold_1	30842649	30843948	HiC_scaffold_41	42203364	42206560
HiC_scaffold_1	30870907	30871949	HiC_scaffold_41	42176915	42177970
HiC_scaffold_1	30880997	30883467	HiC_scaffold_41	42163134	42165185
HiC_scaffold_1	30894136	30895561	HiC_scaffold_41	42159192	42161533
HiC_scaffold_1	30931334	30933268	HiC_scaffold_41	42104400	42106310
HiC_scaffold_1	30963889	30967760	HiC_scaffold_41	42091638	42095106
HiC_scaffold_1	30968257	30971878	HiC_scaffold_41	42002075	42005695
HiC_scaffold_1	30989414	30994444	HiC_scaffold_41	41994615	41997950
HiC_scaffold_1	30997759	31002911	HiC_scaffold_41	41970835	41975976
HiC_scaffold_1	31019004	31019849	HiC_scaffold_41	41914603	41915355
HiC_scaffold_1	31194299	31239104	HiC_scaffold_41	41835856	41840689
HiC_scaffold_1	11636532	11637143	HiC_scaffold_41	47170989	47171576
HiC_scaffold_1	11702330	11709545	HiC_scaffold_41	47058022	47066397
HiC_scaffold_1	11807365	11809585	HiC_scaffold_41	47045712	47050594
HiC_scaffold_1	11910626	11911340	HiC_scaffold_41	47035752	47039648
HiC_scaffold_1	11913789	11925076	HiC_scaffold_41	47023191	47033581
HiC_scaffold_1	11951650	11954239	HiC_scaffold_41	47011994	47014545
HiC_scaffold_1	11989278	11994426	HiC_scaffold_41	46989394	46993370
HiC_scaffold_1	12266365	12270562	HiC_scaffold_41	46958139	46962595
HiC_scaffold_1	12323099	12330161	HiC_scaffold_41	46951461	46955201
HiC_scaffold_1	12423178	12429263	HiC_scaffold_41	46938268	46944079
HiC_scaffold_1	12505118	12511956	HiC_scaffold_41	46921392	46928526
HiC_scaffold_1	12518071	12521158	HiC_scaffold_41	46913024	46917050
HiC_scaffold_1	12521572	12528696	HiC_scaffold_41	46904907	46911455
HiC_scaffold_1	12633319	12638160	HiC_scaffold_41	46893927	46899348
HiC_scaffold_1	12639310	12642003	HiC_scaffold_41	46889831	46892748
HiC_scaffold_1	12741636	12749058	HiC_scaffold_41	46827455	46834129
HiC_scaffold_1	12840629	12846516	HiC_scaffold_41	46811646	46824694
HiC_scaffold_1	12872004	12873428	HiC_scaffold_41	46797399	46798634
HiC_scaffold_1	12879548	12880390	HiC_scaffold_41	46794809	46795651
HiC_scaffold_1	12899095	12903961	HiC_scaffold_41	46776176	46781062
HiC_scaffold_1	13040555	13045455	HiC_scaffold_41	46752824	46758311
HiC_scaffold_1	13050700	13060046	HiC_scaffold_41	46742786	46750819
HiC_scaffold_1	13063444	13064696	HiC_scaffold_41	46737905	46738935
HiC_scaffold_1	13087538	13095817	HiC_scaffold_41	46707580	46716064
HiC_scaffold_1	13126448	13129362	HiC_scaffold_41	46688502	46690576
HiC_scaffold_1	13200662	13204017	HiC_scaffold_41	46651588	46655277
HiC_scaffold_1	13234986	13244922	HiC_scaffold_41	46558560	46567076
HiC_scaffold_1	13514301	13523788	HiC_scaffold_41	46509636	46523646
HiC_scaffold_1	13847487	13855137	HiC_scaffold_41	46462966	46471967
HiC_scaffold_1	13860064	13865204	HiC_scaffold_41	46453897	46460281
HiC_scaffold_1	13888554	13894437	HiC_scaffold_41	46438196	46443759
HiC_scaffold_1	14039836	14049847	HiC_scaffold_41	46414027	46423516
HiC_scaffold_1	14050944	14053344	HiC_scaffold_41	46405780	46408612
HiC_scaffold_1	14178021	14180052	HiC_scaffold_41	46374469	46376628
HiC_scaffold_1	14252666	14254405	HiC_scaffold_41	46371996	46373808
HiC_scaffold_1	14264517	14270380	HiC_scaffold_41	46341194	46346867
HiC_scaffold_1	14271655	14274441	HiC_scaffold_41	46337121	46339911
HiC_scaffold_1	14339900	14343099	HiC_scaffold_41	46321872	46323464
HiC_scaffold_1	14561621	14562976	HiC_scaffold_41	46204630	46205991
HiC_scaffold_1	23089728	23094051	HiC_scaffold_41	45116097	45116687
HiC_scaffold_1	23358150	23363351	HiC_scaffold_41	45109245	45112607
HiC_scaffold_1	23411623	23412936	HiC_scaffold_41	45084065	45084880
HiC_scaffold_1	23468765	23472835	HiC_scaffold_41	45078600	45082945
HiC_scaffold_1	23479870	23485273	HiC_scaffold_41	45069060	45074440
HiC_scaffold_1	23488030	23496103	HiC_scaffold_41	45059456	45066742
HiC_scaffold_1	23853860	23855955	HiC_scaffold_41	45023731	45024039
HiC_scaffold_1	23958027	23962503	HiC_scaffold_41	45002156	45003555
HiC_scaffold_1	23963226	23968999	HiC_scaffold_41	44992959	45001017
HiC_scaffold_1	24345736	24346596	HiC_scaffold_41	44933780	44934676
HiC_scaffold_1	24350536	24355847	HiC_scaffold_41	44925145	44930491
HiC_scaffold_1	24393901	24396479	HiC_scaffold_41	44886674	44889060
HiC_scaffold_1	24427708	24440829	HiC_scaffold_41	44864045	44877217
HiC_scaffold_1	24450347	24458079	HiC_scaffold_41	44845874	44853534
HiC_scaffold_1	24470139	24474641	HiC_scaffold_41	44832406	44836506
HiC_scaffold_1	24560252	24566745	HiC_scaffold_41	44744954	44748757
HiC_scaffold_1	24733326	24733790	HiC_scaffold_41	44717371	44717901
HiC_scaffold_1	24839304	24840420	HiC_scaffold_41	44506218	44506778
HiC_scaffold_1	24855789	24862249	HiC_scaffold_41	44445922	44452033
HiC_scaffold_1	24939437	24948196	HiC_scaffold_41	44354840	44362634
HiC_scaffold_1	24991085	24993074	HiC_scaffold_41	44324501	44326374
HiC_scaffold_1	25002046	25005137	HiC_scaffold_41	44317823	44320952
HiC_scaffold_1	25209224	25212516	HiC_scaffold_41	44165384	44167534
HiC_scaffold_1	25364060	25370431	HiC_scaffold_41	44157731	44163592
HiC_scaffold_1	25381225	25387838	HiC_scaffold_41	44039453	44046020
HiC_scaffold_1	25558241	25558765	HiC_scaffold_41	44001545	44002069
HiC_scaffold_1	25568922	25570304	HiC_scaffold_41	43997227	43998576
HiC_scaffold_1	25786995	25787711	HiC_scaffold_41	43921172	43921846
HiC_scaffold_1	139488	141355	HiC_scaffold_41	48670521	48672310
HiC_scaffold_1	145490	146077	HiC_scaffold_41	48668563	48669630
HiC_scaffold_1	156458	173375	HiC_scaffold_41	48641323	48660854
HiC_scaffold_1	176059	176690	HiC_scaffold_41	48637555	48638179
HiC_scaffold_1	472873	479456	HiC_scaffold_41	48627262	48633945
HiC_scaffold_1	490895	492052	HiC_scaffold_41	48616546	48616833
HiC_scaffold_1	498694	501885	HiC_scaffold_41	48610187	48613095
HiC_scaffold_1	509423	512173	HiC_scaffold_41	48600482	48604129
HiC_scaffold_1	515410	516713	HiC_scaffold_41	48596948	48599541
HiC_scaffold_1	527065	536901	HiC_scaffold_41	48590489	48596916
HiC_scaffold_1	551615	553667	HiC_scaffold_41	48560889	48564126
HiC_scaffold_1	555159	563584	HiC_scaffold_41	48551625	48559320
HiC_scaffold_1	1005065	1008592	HiC_scaffold_41	48508172	48511702
HiC_scaffold_1	1019856	1022315	HiC_scaffold_41	48495109	48496758
HiC_scaffold_1	1028711	1031479	HiC_scaffold_41	48475430	48477900
HiC_scaffold_1	1201744	1203952	HiC_scaffold_41	48418843	48421399
HiC_scaffold_1	1418394	1420451	HiC_scaffold_41	48246131	48246745
HiC_scaffold_1	21567552	21569695	HiC_scaffold_41	45387276	45391746
HiC_scaffold_1	21579226	21579516	HiC_scaffold_41	45382735	45383577
HiC_scaffold_1	21612658	21615275	HiC_scaffold_41	45373495	45379742
HiC_scaffold_1	21695751	21697593	HiC_scaffold_41	45364657	45366507
HiC_scaffold_1	21876913	21881816	HiC_scaffold_41	45339745	45344645
HiC_scaffold_1	21898736	21899920	HiC_scaffold_41	45338457	45339722
HiC_scaffold_1	21968465	21975841	HiC_scaffold_41	45303944	45310890
HiC_scaffold_1	22042357	22047108	HiC_scaffold_41	45271403	45276046
HiC_scaffold_1	22048498	22051843	HiC_scaffold_41	45266427	45270190
HiC_scaffold_1	22057024	22057353	HiC_scaffold_41	45258316	45259391
HiC_scaffold_1	22201100	22205136	HiC_scaffold_41	45226419	45234964
HiC_scaffold_1	22234371	22238914	HiC_scaffold_41	45217469	45223064
HiC_scaffold_1	22308447	22310384	HiC_scaffold_41	45210968	45212796
HiC_scaffold_1	22460515	22461718	HiC_scaffold_41	45186524	45187790
HiC_scaffold_1	22462470	22463188	HiC_scaffold_41	45182147	45185171
HiC_scaffold_1	22700011	22703185	HiC_scaffold_41	45170325	45174076
HiC_scaffold_1	22835911	22840240	HiC_scaffold_41	45116097	45116687
HiC_scaffold_1	4014769	4018799	HiC_scaffold_41	49097510	49106609
HiC_scaffold_1	4054902	4059201	HiC_scaffold_41	49075694	49079695
HiC_scaffold_1	4062585	4064579	HiC_scaffold_41	49070234	49072831
HiC_scaffold_1	4174262	4175072	HiC_scaffold_41	49026105	49027132
HiC_scaffold_1	4179940	4182363	HiC_scaffold_41	49022187	49024413
HiC_scaffold_1	4209150	4217180	HiC_scaffold_41	49011368	49018915
HiC_scaffold_1	4218330	4222935	HiC_scaffold_41	49006579	49010276
HiC_scaffold_1	4229143	4236923	HiC_scaffold_41	48994237	49002651
HiC_scaffold_1	4239235	4248876	HiC_scaffold_41	48986555	48992736
HiC_scaffold_1	4252946	4262107	HiC_scaffold_41	48972699	48981441
HiC_scaffold_1	4264691	4269676	HiC_scaffold_41	48904616	48910633
HiC_scaffold_1	4292601	4294720	HiC_scaffold_41	48847086	48849047
HiC_scaffold_1	4415692	4417553	HiC_scaffold_41	48835145	48837699
HiC_scaffold_1	4421456	4421854	HiC_scaffold_41	48833089	48833487
HiC_scaffold_1	34701675	34702130	HiC_scaffold_41	39613611	39615614
HiC_scaffold_1	34705723	34707280	HiC_scaffold_41	39607998	39609878
HiC_scaffold_1	34727753	34732497	HiC_scaffold_41	39599206	39601426
HiC_scaffold_1	34739612	34742912	HiC_scaffold_41	39593543	39597032
HiC_scaffold_1	34775067	34780531	HiC_scaffold_41	39588279	39590413
HiC_scaffold_1	34787728	34791795	HiC_scaffold_41	39575145	39579530
HiC_scaffold_1	34809651	34811179	HiC_scaffold_41	39561014	39569848
HiC_scaffold_1	34823556	34828242	HiC_scaffold_41	39549097	39554370
HiC_scaffold_1	34835468	34841243	HiC_scaffold_41	39541608	39546489
HiC_scaffold_1	16647077	16649120	HiC_scaffold_41	46013564	46017293
HiC_scaffold_1	17054601	17060352	HiC_scaffold_41	45907218	45911150
HiC_scaffold_1	17539757	17542293	HiC_scaffold_41	45886658	45889162
HiC_scaffold_1	17542826	17544570	HiC_scaffold_41	45884427	45885709
HiC_scaffold_1	17582560	17583142	HiC_scaffold_41	45859113	45860856
HiC_scaffold_1	17838589	17840433	HiC_scaffold_41	45850394	45852278
HiC_scaffold_1	17940769	17942716	HiC_scaffold_41	45755840	45757723
HiC_scaffold_1	18238396	18244248	HiC_scaffold_41	45686877	45693530
HiC_scaffold_1	18270286	18309310	HiC_scaffold_41	45631223	45641548
HiC_scaffold_1	2776555	2777475	HiC_scaffold_41	49232954	49234851
HiC_scaffold_1	2851392	2855484	HiC_scaffold_41	49207933	49211545
HiC_scaffold_1	2857918	2859140	HiC_scaffold_41	49203553	49204849
HiC_scaffold_1	2880449	2885143	HiC_scaffold_41	49190452	49196139
HiC_scaffold_1	3207998	3217047	HiC_scaffold_41	49097510	49106609
HiC_scaffold_1	3313895	3317032	HiC_scaffold_41	48904616	48910633
HiC_scaffold_1	3541616	3542701	HiC_scaffold_41	48793692	48794900
HiC_scaffold_1	3619397	3619774	HiC_scaffold_41	48741198	48741521
HiC_scaffold_1	24450347	24458079	HiC_scaffold_41	44623368	44624725
HiC_scaffold_1	24470139	24474641	HiC_scaffold_41	44607178	44611566
HiC_scaffold_1	24560252	24566745	HiC_scaffold_41	44540552	44546158
HiC_scaffold_1	24733326	24733790	HiC_scaffold_41	44376173	44376722
HiC_scaffold_1	24982411	24984200	HiC_scaffold_41	44279808	44287135
HiC_scaffold_1	24984774	24985986	HiC_scaffold_41	44277783	44279350
HiC_scaffold_1	25140278	25140520	HiC_scaffold_41	44116307	44117695
HiC_scaffold_1	9201747	9205706	HiC_scaffold_41	49703868	49706084
HiC_scaffold_1	9355374	9358445	HiC_scaffold_41	49584110	49587241
HiC_scaffold_1	9360912	9364676	HiC_scaffold_41	49577980	49581158
HiC_scaffold_1	9438363	9441523	HiC_scaffold_41	49529524	49530441
HiC_scaffold_1	9650195	9660448	HiC_scaffold_41	49389522	49399295
HiC_scaffold_1	9741576	9747674	HiC_scaffold_41	49376296	49378589
HiC_scaffold_1	1328765	1330144	HiC_scaffold_41	50043027	50050885
HiC_scaffold_1	1350672	1353976	HiC_scaffold_41	49987592	49990990
HiC_scaffold_1	1378498	1380018	HiC_scaffold_41	49975539	49979430
HiC_scaffold_1	1410965	1413729	HiC_scaffold_41	49875847	49878448
HiC_scaffold_1	1464884	1471067	HiC_scaffold_41	49850250	49854008
HiC_scaffold_1	1213394	1216924	HiC_scaffold_41	49789882	49792392
HiC_scaffold_1	1223085	1225137	HiC_scaffold_41	49783815	49785930
HiC_scaffold_1	1245723	1253580	HiC_scaffold_41	49768306	49777032
HiC_scaffold_1	1299150	1303659	HiC_scaffold_41	49765378	49767245
HiC_scaffold_1	1307656	1310909	HiC_scaffold_41	49759998	49763252
HiC_scaffold_1	15077231	15078021	HiC_scaffold_41	46204630	46205991
HiC_scaffold_1	15349207	15350004	HiC_scaffold_41	46113223	46115200
HiC_scaffold_1	15754676	15769444	HiC_scaffold_41	46094117	46108227
HiC_scaffold_1	15789892	15791813	HiC_scaffold_41	46082346	46084117
HiC_scaffold_1	16117699	16121249	HiC_scaffold_41	45947828	45951286
HiC_scaffold_1	30217919	30218953	HiC_scaffold_46	34022239	34024183
HiC_scaffold_1	30280276	30281904	HiC_scaffold_46	34007702	34016004
HiC_scaffold_1	30286471	30288603	HiC_scaffold_46	34004221	34007634
HiC_scaffold_1	30350527	30356677	HiC_scaffold_46	33995565	34001282
HiC_scaffold_1	30575986	30577680	HiC_scaffold_46	33957908	33960010
HiC_scaffold_1	30579115	30580023	HiC_scaffold_46	33956405	33957334
HiC_scaffold_1	23479870	23485273	HiC_scaffold_46	33743243	33748115
HiC_scaffold_1	23488030	23496103	HiC_scaffold_46	33740351	33741128
HiC_scaffold_1	23853860	23855955	HiC_scaffold_46	33716169	33716480
HiC_scaffold_1	24427708	24440829	HiC_scaffold_46	33703137	33711903
HiC_scaffold_1	24450347	24458079	HiC_scaffold_46	33698111	33702612
HiC_scaffold_1	24560252	24566745	HiC_scaffold_46	33689961	33695108
HiC_scaffold_1	23479870	23485273	HiC_scaffold_47	2820817	2824185
HiC_scaffold_1	23488030	23496103	HiC_scaffold_47	2825191	2829845
HiC_scaffold_1	23853860	23855955	HiC_scaffold_47	2877516	2877827
HiC_scaffold_1	24427708	24440829	HiC_scaffold_47	2881934	2890675
HiC_scaffold_1	24450347	24458079	HiC_scaffold_47	2891403	2896054
HiC_scaffold_1	24560252	24566745	HiC_scaffold_47	2898928	2904038
HiC_scaffold_1	29887288	29889409	HiC_scaffold_47	2172800	2174989
HiC_scaffold_1	30217919	30218953	HiC_scaffold_47	2290364	2291314
HiC_scaffold_1	30280276	30281904	HiC_scaffold_47	2300474	2303575
HiC_scaffold_1	30286471	30288603	HiC_scaffold_47	2310414	2314035
HiC_scaffold_1	30350527	30356677	HiC_scaffold_47	2316700	2322683
HiC_scaffold_1	30575986	30577680	HiC_scaffold_47	2366315	2367611
HiC_scaffold_1	30579115	30580023	HiC_scaffold_47	2369326	2370255
HiC_scaffold_1	33821561	33822553	HiC_scaffold_47	2962992	2964890
HiC_scaffold_1	33916882	33917657	HiC_scaffold_47	2947704	2949089
HiC_scaffold_1	34056770	34057129	HiC_scaffold_47	2943476	2943820
HiC_scaffold_1	34086154	34087491	HiC_scaffold_47	2940520	2942264
HiC_scaffold_1	34108949	34110287	HiC_scaffold_47	2934455	2935372
HiC_scaffold_1	26820447	26821647	HiC_scaffold_52	19442887	19444810
HiC_scaffold_1	27366399	27367794	HiC_scaffold_52	19800566	19800723
HiC_scaffold_1	27727693	27729250	HiC_scaffold_52	19890047	19890982
HiC_scaffold_1	27900378	27901207	HiC_scaffold_52	20340636	20341963
HiC_scaffold_1	27909576	27909866	HiC_scaffold_52	20610281	20611041
HiC_scaffold_1	17918925	17919736	HiC_scaffold_6	16653326	16654105
HiC_scaffold_1	18259087	18261545	HiC_scaffold_6	16010925	16015319
HiC_scaffold_1	18858370	18862787	HiC_scaffold_6	15780137	15789806
HiC_scaffold_1	19350084	19351174	HiC_scaffold_6	15578807	15579538
HiC_scaffold_1	19801111	19802247	HiC_scaffold_6	15307859	15308944
HiC_scaffold_10	700267	703400	HiC_scaffold_1	17539757	17542293
HiC_scaffold_10	1178061	1178570	HiC_scaffold_1	17820427	17822379
HiC_scaffold_10	1356031	1357422	HiC_scaffold_1	17918925	17919736
HiC_scaffold_10	1608786	1609326	HiC_scaffold_1	18522258	18522842
HiC_scaffold_10	1800602	1801738	HiC_scaffold_1	18817189	18819342
HiC_scaffold_10	7220967	7221253	HiC_scaffold_1	19587612	19590473
HiC_scaffold_10	7477812	7479645	HiC_scaffold_1	18817189	18819342
HiC_scaffold_10	7837216	7839179	HiC_scaffold_1	18720419	18720899
HiC_scaffold_10	7955047	7955940	HiC_scaffold_1	18396555	18397292
HiC_scaffold_10	8101695	8102375	HiC_scaffold_1	17820427	17822379
HiC_scaffold_10	32846348	32850953	HiC_scaffold_10	32940589	32946966
HiC_scaffold_10	32866678	32867507	HiC_scaffold_10	32950645	32953804
HiC_scaffold_10	32873026	32874483	HiC_scaffold_10	32962837	32964284
HiC_scaffold_10	32875341	32877823	HiC_scaffold_10	32965143	32967636
HiC_scaffold_10	32880787	32888046	HiC_scaffold_10	32970620	32977873
HiC_scaffold_10	32902353	32904362	HiC_scaffold_10	32992591	32995142
HiC_scaffold_10	32909229	32914174	HiC_scaffold_10	32996711	33004487
HiC_scaffold_10	32917501	32923434	HiC_scaffold_10	33007826	33012260
HiC_scaffold_10	32924588	32925770	HiC_scaffold_10	33014907	33015709
HiC_scaffold_10	34698767	34699792	HiC_scaffold_10	34777378	34778727
HiC_scaffold_10	34711978	34713187	HiC_scaffold_10	34798818	34800703
HiC_scaffold_10	34721597	34724363	HiC_scaffold_10	34801988	34804428
HiC_scaffold_10	34727752	34731512	HiC_scaffold_10	34816726	34820448
HiC_scaffold_10	34733781	34735215	HiC_scaffold_10	34822797	34824259
HiC_scaffold_10	34751582	34751938	HiC_scaffold_10	34840947	34841308
HiC_scaffold_10	34755200	34755507	HiC_scaffold_10	34844423	34844950
HiC_scaffold_10	2024938	2027929	HiC_scaffold_10	3169128	3172113
HiC_scaffold_10	2032035	2034548	HiC_scaffold_10	3161807	3164322
HiC_scaffold_10	2070659	2076936	HiC_scaffold_10	3136975	3140153
HiC_scaffold_10	2112714	2113813	HiC_scaffold_10	3032242	3033866
HiC_scaffold_10	2125995	2127624	HiC_scaffold_10	3011096	3012890
HiC_scaffold_10	2185136	2185660	HiC_scaffold_10	2951466	2953544
HiC_scaffold_10	2199539	2202003	HiC_scaffold_10	2937785	2938940
HiC_scaffold_10	2356532	2357582	HiC_scaffold_10	2833053	2834104
HiC_scaffold_10	2359865	2361653	HiC_scaffold_10	2830398	2831072
HiC_scaffold_10	2629936	2630295	HiC_scaffold_10	3227197	3228886
HiC_scaffold_10	2633568	2636268	HiC_scaffold_10	3221856	3225446
HiC_scaffold_10	2638673	2639840	HiC_scaffold_10	3219236	3220324
HiC_scaffold_10	2645245	2648010	HiC_scaffold_10	3210979	3213746
HiC_scaffold_10	2648280	2651697	HiC_scaffold_10	3207293	3210709
HiC_scaffold_10	32940589	32946966	HiC_scaffold_10	32846348	32850953
HiC_scaffold_10	32950645	32953804	HiC_scaffold_10	32866678	32867507
HiC_scaffold_10	32962837	32964284	HiC_scaffold_10	32873026	32874483
HiC_scaffold_10	32965143	32967636	HiC_scaffold_10	32875341	32877823
HiC_scaffold_10	32970620	32977873	HiC_scaffold_10	32880787	32888046
HiC_scaffold_10	32992591	32995142	HiC_scaffold_10	32902353	32904362
HiC_scaffold_10	32996711	33004487	HiC_scaffold_10	32909229	32914174
HiC_scaffold_10	33007826	33012260	HiC_scaffold_10	32917501	32923434
HiC_scaffold_10	33014907	33015709	HiC_scaffold_10	32924588	32925770
HiC_scaffold_10	34777378	34778727	HiC_scaffold_10	34698767	34699792
HiC_scaffold_10	34798818	34800703	HiC_scaffold_10	34711978	34713187
HiC_scaffold_10	34801988	34804428	HiC_scaffold_10	34721597	34724363
HiC_scaffold_10	34816726	34820448	HiC_scaffold_10	34727752	34731512
HiC_scaffold_10	34822797	34824259	HiC_scaffold_10	34733781	34735215
HiC_scaffold_10	34840947	34841308	HiC_scaffold_10	34751582	34751938
HiC_scaffold_10	34844423	34844950	HiC_scaffold_10	34755200	34755507
HiC_scaffold_10	2830398	2831072	HiC_scaffold_10	2359865	2361653
HiC_scaffold_10	2833053	2834104	HiC_scaffold_10	2356532	2357582
HiC_scaffold_10	2937785	2938940	HiC_scaffold_10	2199539	2202003
HiC_scaffold_10	2951466	2953544	HiC_scaffold_10	2185136	2185660
HiC_scaffold_10	3011096	3012890	HiC_scaffold_10	2125995	2127624
HiC_scaffold_10	3032242	3033866	HiC_scaffold_10	2112714	2113813
HiC_scaffold_10	3136975	3140153	HiC_scaffold_10	2070659	2076936
HiC_scaffold_10	3161807	3164322	HiC_scaffold_10	2032035	2034548
HiC_scaffold_10	3172340	3175274	HiC_scaffold_10	2024938	2027929
HiC_scaffold_10	3207293	3210709	HiC_scaffold_10	2648280	2651697
HiC_scaffold_10	3210979	3213746	HiC_scaffold_10	2645245	2648010
HiC_scaffold_10	3219236	3220324	HiC_scaffold_10	2638673	2639840
HiC_scaffold_10	3221856	3225446	HiC_scaffold_10	2633568	2636268
HiC_scaffold_10	3227197	3228886	HiC_scaffold_10	2629936	2630295
HiC_scaffold_10	1451578	1453190	HiC_scaffold_11	4465362	4468916
HiC_scaffold_10	1468950	1472683	HiC_scaffold_11	4470200	4474003
HiC_scaffold_10	1521515	1523643	HiC_scaffold_11	4507215	4508624
HiC_scaffold_10	1568095	1572780	HiC_scaffold_11	4543116	4545268
HiC_scaffold_10	1650556	1651817	HiC_scaffold_11	4548013	4549628
HiC_scaffold_10	1658091	1664846	HiC_scaffold_11	4554501	4557491
HiC_scaffold_10	1708479	1711446	HiC_scaffold_11	4560065	4562734
HiC_scaffold_10	1929728	1930042	HiC_scaffold_11	4579721	4581535
HiC_scaffold_10	1968636	1969288	HiC_scaffold_11	4586745	4588459
HiC_scaffold_10	32240070	32248080	HiC_scaffold_11	2872522	2879627
HiC_scaffold_10	32267026	32274028	HiC_scaffold_11	2888002	2893493
HiC_scaffold_10	32337236	32338187	HiC_scaffold_11	3035907	3036832
HiC_scaffold_10	32422650	32422955	HiC_scaffold_11	3073010	3077783
HiC_scaffold_10	32592001	32597600	HiC_scaffold_11	3152535	3158568
HiC_scaffold_10	32672267	32675368	HiC_scaffold_11	3178000	3179407
HiC_scaffold_10	32716730	32719919	HiC_scaffold_11	3210723	3213864
HiC_scaffold_10	32909229	32914174	HiC_scaffold_11	3230050	3237976
HiC_scaffold_10	174019	178358	HiC_scaffold_11	3956506	3957951
HiC_scaffold_10	461450	463555	HiC_scaffold_11	3966176	3974280
HiC_scaffold_10	590417	591571	HiC_scaffold_11	3978714	3979742
HiC_scaffold_10	677162	679220	HiC_scaffold_11	3983160	3984610
HiC_scaffold_10	926541	929345	HiC_scaffold_11	4043446	4046404
HiC_scaffold_10	1319887	1322597	HiC_scaffold_11	4077432	4079844
HiC_scaffold_10	1336090	1337512	HiC_scaffold_11	4179600	4182382
HiC_scaffold_10	33777769	33783567	HiC_scaffold_11	3575380	3578657
HiC_scaffold_10	33870394	33877605	HiC_scaffold_11	3546127	3551233
HiC_scaffold_10	33886031	33886477	HiC_scaffold_11	3494121	3494546
HiC_scaffold_10	33913069	33919293	HiC_scaffold_11	3476733	3480675
HiC_scaffold_10	33981390	33982115	HiC_scaffold_11	3430655	3432016
HiC_scaffold_10	34027903	34032698	HiC_scaffold_11	3415460	3419486
HiC_scaffold_10	34052320	34060364	HiC_scaffold_11	3406422	3410117
HiC_scaffold_10	34113660	34115702	HiC_scaffold_11	3373190	3376387
HiC_scaffold_10	34137644	34140873	HiC_scaffold_11	3354577	3362525
HiC_scaffold_10	34179769	34181588	HiC_scaffold_11	3334957	3336486
HiC_scaffold_10	34182417	34184942	HiC_scaffold_11	3330487	3333711
HiC_scaffold_10	33777769	33783567	HiC_scaffold_11	390330	393627
HiC_scaffold_10	33870394	33877605	HiC_scaffold_11	339707	344676
HiC_scaffold_10	33886031	33886477	HiC_scaffold_11	331723	334713
HiC_scaffold_10	33913069	33919293	HiC_scaffold_11	300229	304380
HiC_scaffold_10	34027903	34032698	HiC_scaffold_11	202312	206555
HiC_scaffold_10	34052320	34060364	HiC_scaffold_11	195261	199016
HiC_scaffold_10	34113660	34115702	HiC_scaffold_11	159387	161860
HiC_scaffold_10	34137644	34140873	HiC_scaffold_11	139474	144878
HiC_scaffold_10	34179769	34181588	HiC_scaffold_11	114430	115732
HiC_scaffold_10	34182417	34184942	HiC_scaffold_11	104499	107707
HiC_scaffold_10	32240070	32248080	HiC_scaffold_11	1145480	1151902
HiC_scaffold_10	32267026	32274028	HiC_scaffold_11	1132086	1137325
HiC_scaffold_10	32337236	32338187	HiC_scaffold_11	1104993	1105917
HiC_scaffold_10	32422650	32422955	HiC_scaffold_11	926797	934711
HiC_scaffold_10	32592001	32597600	HiC_scaffold_11	755543	764921
HiC_scaffold_10	32672267	32675368	HiC_scaffold_11	733763	735187
HiC_scaffold_10	32682218	32683700	HiC_scaffold_11	725755	728566
HiC_scaffold_10	32716730	32719919	HiC_scaffold_11	698369	699685
HiC_scaffold_10	32909229	32914174	HiC_scaffold_11	668749	677456
HiC_scaffold_10	13688875	13689850	HiC_scaffold_13	27005683	27007727
HiC_scaffold_10	13951237	13955917	HiC_scaffold_13	26461508	26463163
HiC_scaffold_10	14490173	14490688	HiC_scaffold_13	26377769	26378913
HiC_scaffold_10	15127790	15129600	HiC_scaffold_13	25658665	25659859
HiC_scaffold_10	15849143	15849638	HiC_scaffold_13	24875923	24876420
HiC_scaffold_10	16117824	16119321	HiC_scaffold_13	24300044	24303525
HiC_scaffold_10	13688875	13689850	HiC_scaffold_15	7470076	7470600
HiC_scaffold_10	13951237	13955917	HiC_scaffold_15	8108837	8109949
HiC_scaffold_10	14130505	14131142	HiC_scaffold_15	8280298	8280526
HiC_scaffold_10	14400793	14402243	HiC_scaffold_15	8461452	8462024
HiC_scaffold_10	15037127	15039658	HiC_scaffold_15	8733060	8734277
HiC_scaffold_10	15758958	15759429	HiC_scaffold_15	8828704	8829193
HiC_scaffold_10	16117824	16119321	HiC_scaffold_15	9090679	9092831
HiC_scaffold_10	14490173	14490688	HiC_scaffold_15	9818809	9819406
HiC_scaffold_10	15127790	15129600	HiC_scaffold_15	9900661	9900924
HiC_scaffold_10	15849143	15849638	HiC_scaffold_15	10080147	10080635
HiC_scaffold_10	16117824	16119321	HiC_scaffold_15	10085998	10089447
HiC_scaffold_10	16567074	16567877	HiC_scaffold_15	10178457	10179878
HiC_scaffold_10	16928112	16929325	HiC_scaffold_15	10620296	10621909
HiC_scaffold_10	17017194	17018736	HiC_scaffold_15	10710182	10710381
HiC_scaffold_10	17378602	17379684	HiC_scaffold_15	10988543	10989167
HiC_scaffold_10	7470275	7471763	HiC_scaffold_15	18007306	18008582
HiC_scaffold_10	7830493	7833106	HiC_scaffold_15	18548283	18549942
HiC_scaffold_10	8737973	8738959	HiC_scaffold_15	19170351	19172884
HiC_scaffold_10	8914421	8914732	HiC_scaffold_15	19623741	19627199
HiC_scaffold_10	9542628	9543957	HiC_scaffold_15	19712447	19713399
HiC_scaffold_10	16117824	16119321	HiC_scaffold_15	12787914	12789920
HiC_scaffold_10	16207712	16208635	HiC_scaffold_15	13140549	13141051
HiC_scaffold_10	16928112	16929325	HiC_scaffold_15	13590084	13592355
HiC_scaffold_10	17017194	17018736	HiC_scaffold_15	14040079	14040579
HiC_scaffold_10	17378602	17379684	HiC_scaffold_15	14677347	14679901
HiC_scaffold_10	16117824	16119321	HiC_scaffold_15	15939064	15939415
HiC_scaffold_10	16207712	16208635	HiC_scaffold_15	15390832	15391329
HiC_scaffold_10	16928112	16929325	HiC_scaffold_15	15120087	15120908
HiC_scaffold_10	17017194	17018736	HiC_scaffold_15	14941487	14942503
HiC_scaffold_10	17378602	17379684	HiC_scaffold_15	14677347	14679901
HiC_scaffold_10	30144339	30147615	HiC_scaffold_18	2962932	2965323
HiC_scaffold_10	30481130	30484663	HiC_scaffold_18	2809861	2818502
HiC_scaffold_10	30623718	30626940	HiC_scaffold_18	2531872	2533296
HiC_scaffold_10	30861874	30863636	HiC_scaffold_18	2497059	2498504
HiC_scaffold_10	31056373	31059028	HiC_scaffold_18	2238220	2240261
HiC_scaffold_10	31061064	31063637	HiC_scaffold_18	2220405	2222223
HiC_scaffold_10	31102988	31105538	HiC_scaffold_18	2183434	2188510
HiC_scaffold_10	31211005	31212888	HiC_scaffold_18	2134232	2135827
HiC_scaffold_10	31251316	31254307	HiC_scaffold_18	2095787	2101684
HiC_scaffold_10	31409822	31412991	HiC_scaffold_18	1988175	1990591
HiC_scaffold_10	31458011	31461706	HiC_scaffold_18	1816269	1817913
HiC_scaffold_10	31638525	31647421	HiC_scaffold_18	1775728	1778834
HiC_scaffold_10	31665137	31665589	HiC_scaffold_18	1767844	1768545
HiC_scaffold_10	31056373	31059028	HiC_scaffold_19	1749747	1751328
HiC_scaffold_10	31102988	31105538	HiC_scaffold_19	1838685	1840128
HiC_scaffold_10	31211005	31212888	HiC_scaffold_19	1866263	1867840
HiC_scaffold_10	31251316	31254307	HiC_scaffold_19	1910873	1913946
HiC_scaffold_10	31458011	31461706	HiC_scaffold_19	2064078	2065727
HiC_scaffold_10	31638525	31647421	HiC_scaffold_19	2097503	2100624
HiC_scaffold_10	31665137	31665589	HiC_scaffold_19	2130594	2131304
HiC_scaffold_10	31745244	31747952	HiC_scaffold_19	2145772	2148048
HiC_scaffold_10	14585701	14588733	HiC_scaffold_22	11163602	11165310
HiC_scaffold_10	14850440	14851318	HiC_scaffold_22	11617038	11619081
HiC_scaffold_10	15037127	15039658	HiC_scaffold_22	11794456	11797110
HiC_scaffold_10	15930081	15930336	HiC_scaffold_22	12247701	12248756
HiC_scaffold_10	16117824	16119321	HiC_scaffold_22	12330164	12331605
HiC_scaffold_10	16567074	16567877	HiC_scaffold_22	12425693	12427163
HiC_scaffold_10	16928112	16929325	HiC_scaffold_22	12690479	12692281
HiC_scaffold_10	14130505	14131142	HiC_scaffold_22	12780667	12781290
HiC_scaffold_10	14490173	14490688	HiC_scaffold_22	12690479	12692281
HiC_scaffold_10	15037127	15039658	HiC_scaffold_22	12425693	12427163
HiC_scaffold_10	15930081	15930336	HiC_scaffold_22	12247701	12248756
HiC_scaffold_10	16117824	16119321	HiC_scaffold_22	11794456	11797110
HiC_scaffold_10	16207712	16208635	HiC_scaffold_22	11617038	11619081
HiC_scaffold_10	16567074	16567877	HiC_scaffold_22	11163602	11165310
HiC_scaffold_10	13688875	13689850	HiC_scaffold_22	18000930	18004063
HiC_scaffold_10	13951237	13955917	HiC_scaffold_22	17460645	17461491
HiC_scaffold_10	14490173	14490688	HiC_scaffold_22	17190830	17192082
HiC_scaffold_10	14679472	14679814	HiC_scaffold_22	16836498	16838929
HiC_scaffold_10	15127790	15129600	HiC_scaffold_22	16740155	16740532
HiC_scaffold_10	14490173	14490688	HiC_scaffold_23	17190019	17190606
HiC_scaffold_10	15037127	15039658	HiC_scaffold_23	17557310	17558869
HiC_scaffold_10	15758958	15759429	HiC_scaffold_23	17739742	17739918
HiC_scaffold_10	16117824	16119321	HiC_scaffold_23	18008722	18009605
HiC_scaffold_10	16207712	16208635	HiC_scaffold_23	18540892	18542254
HiC_scaffold_10	13951237	13955917	HiC_scaffold_25	12512131	12513165
HiC_scaffold_10	14490173	14490688	HiC_scaffold_25	12690594	12691436
HiC_scaffold_10	14585701	14588733	HiC_scaffold_25	13148326	13149661
HiC_scaffold_10	14760456	14760713	HiC_scaffold_25	13509287	13509768
HiC_scaffold_10	14968717	14969385	HiC_scaffold_25	13855886	13856568
HiC_scaffold_10	15037127	15039658	HiC_scaffold_25	14408668	14409448
HiC_scaffold_10	21420260	21420938	HiC_scaffold_25	13681778	13683247
HiC_scaffold_10	21426513	21429612	HiC_scaffold_25	13148326	13149661
HiC_scaffold_10	21780218	21780868	HiC_scaffold_25	13140019	13141141
HiC_scaffold_10	21870688	21872383	HiC_scaffold_25	12698896	12699881
HiC_scaffold_10	21876446	21877447	HiC_scaffold_25	12608811	12609340
HiC_scaffold_10	19980679	19981687	HiC_scaffold_26	29615033	29617984
HiC_scaffold_10	20528548	20529279	HiC_scaffold_26	28890445	28891064
HiC_scaffold_10	20881042	20882644	HiC_scaffold_26	28530833	28532144
HiC_scaffold_10	21068049	21069354	HiC_scaffold_26	28086777	28087869
HiC_scaffold_10	21420260	21420938	HiC_scaffold_26	27630158	27631097
HiC_scaffold_10	15037127	15039658	HiC_scaffold_26	34388095	34389239
HiC_scaffold_10	15758958	15759429	HiC_scaffold_26	34028687	34028837
HiC_scaffold_10	16117824	16119321	HiC_scaffold_26	33663152	33664228
HiC_scaffold_10	16407979	16409983	HiC_scaffold_26	33508948	33509249
HiC_scaffold_10	16928112	16929325	HiC_scaffold_26	33030564	33033907
HiC_scaffold_10	19980679	19981687	HiC_scaffold_28	13146768	13149823
HiC_scaffold_10	20528548	20529279	HiC_scaffold_28	12960692	12961642
HiC_scaffold_10	20881042	20882644	HiC_scaffold_28	12698795	12699513
HiC_scaffold_10	21068049	21069354	HiC_scaffold_28	12420554	12421354
HiC_scaffold_10	21420260	21420938	HiC_scaffold_28	11881426	11883557
HiC_scaffold_10	35256960	35257502	HiC_scaffold_29	21687514	21688056
HiC_scaffold_10	35268306	35269043	HiC_scaffold_29	21698861	21700645
HiC_scaffold_10	35281229	35285866	HiC_scaffold_29	21711791	21715746
HiC_scaffold_10	35286274	35288132	HiC_scaffold_29	21716840	21718692
HiC_scaffold_10	35336433	35340396	HiC_scaffold_29	21832445	21837710
HiC_scaffold_10	19980679	19981687	HiC_scaffold_3	20613062	20614810
HiC_scaffold_10	20528548	20529279	HiC_scaffold_3	21421586	21423561
HiC_scaffold_10	20881042	20882644	HiC_scaffold_3	21518475	21519783
HiC_scaffold_10	21068049	21069354	HiC_scaffold_3	21695853	21697687
HiC_scaffold_10	21426513	21429612	HiC_scaffold_3	21968464	21969905
HiC_scaffold_10	13688875	13689850	HiC_scaffold_32	12159030	12159776
HiC_scaffold_10	13860028	13860504	HiC_scaffold_32	12247876	12248796
HiC_scaffold_10	13951237	13955917	HiC_scaffold_32	12421136	12423818
HiC_scaffold_10	14400793	14402243	HiC_scaffold_32	12608523	12609067
HiC_scaffold_10	14490173	14490688	HiC_scaffold_32	13328302	13329820
HiC_scaffold_10	15127790	15129600	HiC_scaffold_32	13868962	13869338
HiC_scaffold_10	27086746	27087312	HiC_scaffold_38	32776874	32777365
HiC_scaffold_10	27209920	27211602	HiC_scaffold_38	32720955	32722495
HiC_scaffold_10	27521302	27522675	HiC_scaffold_38	32576081	32577403
HiC_scaffold_10	27754762	27756548	HiC_scaffold_38	32568128	32569587
HiC_scaffold_10	28294549	28298246	HiC_scaffold_38	32509737	32513028
HiC_scaffold_10	28378042	28379191	HiC_scaffold_38	32361864	32364477
HiC_scaffold_10	5223865	5229888	HiC_scaffold_39	27672533	27682650
HiC_scaffold_10	5507275	5509303	HiC_scaffold_39	27690085	27692353
HiC_scaffold_10	5626619	5629011	HiC_scaffold_39	27740403	27743237
HiC_scaffold_10	5899768	5903281	HiC_scaffold_39	27987970	27991133
HiC_scaffold_10	6120160	6121265	HiC_scaffold_39	28536732	28538361
HiC_scaffold_10	20881042	20882644	HiC_scaffold_39	10441296	10442468
HiC_scaffold_10	21068049	21069354	HiC_scaffold_39	10890350	10891104
HiC_scaffold_10	21426513	21429612	HiC_scaffold_39	11340433	11341935
HiC_scaffold_10	21609633	21609995	HiC_scaffold_39	11708000	11709745
HiC_scaffold_10	21962921	21964820	HiC_scaffold_39	12429061	12429653
HiC_scaffold_10	14490173	14490688	HiC_scaffold_39	14768249	14769296
HiC_scaffold_10	14585701	14588733	HiC_scaffold_39	15121402	15123215
HiC_scaffold_10	14679472	14679814	HiC_scaffold_39	15751877	15753587
HiC_scaffold_10	14850440	14851318	HiC_scaffold_39	16386829	16387757
HiC_scaffold_10	15037127	15039658	HiC_scaffold_39	16567925	16569162
HiC_scaffold_10	14857782	14859377	HiC_scaffold_39	23310877	23312531
HiC_scaffold_10	15127790	15129600	HiC_scaffold_39	23229525	23229944
HiC_scaffold_10	15568975	15569539	HiC_scaffold_39	23058297	23058700
HiC_scaffold_10	16117824	16119321	HiC_scaffold_39	22951258	22951614
HiC_scaffold_10	16567074	16567877	HiC_scaffold_39	22866857	22869839
HiC_scaffold_10	27086746	27087312	HiC_scaffold_39	34579992	34580432
HiC_scaffold_10	27209920	27211602	HiC_scaffold_39	34536824	34538014
HiC_scaffold_10	27521302	27522675	HiC_scaffold_39	34384095	34385417
HiC_scaffold_10	27754762	27756548	HiC_scaffold_39	34365210	34366991
HiC_scaffold_10	28294549	28298246	HiC_scaffold_39	34222751	34226082
HiC_scaffold_10	28378042	28379191	HiC_scaffold_39	33963391	33965883
HiC_scaffold_10	31084774	31085073	HiC_scaffold_41	37064509	37064784
HiC_scaffold_10	31211005	31212888	HiC_scaffold_41	37080692	37082153
HiC_scaffold_10	31251316	31254307	HiC_scaffold_41	37208948	37211932
HiC_scaffold_10	31409822	31412991	HiC_scaffold_41	37286007	37288079
HiC_scaffold_10	31665137	31665589	HiC_scaffold_41	37339713	37340099
HiC_scaffold_10	31895496	31897769	HiC_scaffold_41	37431407	37435187
HiC_scaffold_10	31927357	31929571	HiC_scaffold_41	37460617	37462600
HiC_scaffold_10	32038844	32040382	HiC_scaffold_41	37625747	37627189
HiC_scaffold_10	32042564	32046181	HiC_scaffold_41	37630323	37633094
HiC_scaffold_10	13688875	13689850	HiC_scaffold_41	9096235	9098619
HiC_scaffold_10	13951237	13955917	HiC_scaffold_41	9186195	9187355
HiC_scaffold_10	14130505	14131142	HiC_scaffold_41	9459203	9459996
HiC_scaffold_10	14490173	14490688	HiC_scaffold_41	9721313	9722698
HiC_scaffold_10	15127790	15129600	HiC_scaffold_41	10358608	10359925
HiC_scaffold_10	14490173	14490688	HiC_scaffold_42	11616927	11618690
HiC_scaffold_10	15037127	15039658	HiC_scaffold_42	11798008	11798430
HiC_scaffold_10	15849143	15849638	HiC_scaffold_42	12330031	12330281
HiC_scaffold_10	16117824	16119321	HiC_scaffold_42	13320495	13321711
HiC_scaffold_10	16567074	16567877	HiC_scaffold_42	13500866	13502545
HiC_scaffold_10	17017194	17018736	HiC_scaffold_42	13688570	13689148
HiC_scaffold_10	16117824	16119321	HiC_scaffold_42	15481645	15483857
HiC_scaffold_10	16349674	16350244	HiC_scaffold_42	15501627	15502127
HiC_scaffold_10	16567074	16567877	HiC_scaffold_42	15840330	15841436
HiC_scaffold_10	16928112	16929325	HiC_scaffold_42	16207108	16207892
HiC_scaffold_10	17058199	17058370	HiC_scaffold_42	16246715	16246932
HiC_scaffold_10	17640862	17641601	HiC_scaffold_42	16389624	16389936
HiC_scaffold_10	13688875	13689850	HiC_scaffold_42	21428911	21429559
HiC_scaffold_10	13951237	13955917	HiC_scaffold_42	21337624	21339653
HiC_scaffold_10	14490173	14490688	HiC_scaffold_42	21247828	21249069
HiC_scaffold_10	15037127	15039658	HiC_scaffold_42	20796788	20798021
HiC_scaffold_10	15127790	15129600	HiC_scaffold_42	20070747	20071912
HiC_scaffold_10	21870688	21872383	HiC_scaffold_42	36720095	36721087
HiC_scaffold_10	21876446	21877447	HiC_scaffold_42	36548168	36549353
HiC_scaffold_10	22026341	22032013	HiC_scaffold_42	36313376	36316986
HiC_scaffold_10	22789486	22791906	HiC_scaffold_42	36036195	36041826
HiC_scaffold_10	23498243	23499531	HiC_scaffold_42	35640082	35641507
HiC_scaffold_10	34350804	34353210	HiC_scaffold_43	4691076	4693865
HiC_scaffold_10	34398461	34404394	HiC_scaffold_43	4765341	4769791
HiC_scaffold_10	34406745	34407470	HiC_scaffold_43	4772438	4772925
HiC_scaffold_10	34413070	34416537	HiC_scaffold_43	4865051	4867452
HiC_scaffold_10	34578483	34580201	HiC_scaffold_43	4917619	4919433
HiC_scaffold_10	34650353	34651446	HiC_scaffold_43	5060984	5063445
HiC_scaffold_10	34667086	34669689	HiC_scaffold_43	5065487	5067078
HiC_scaffold_10	34801988	34804428	HiC_scaffold_43	5074090	5076238
HiC_scaffold_10	34944257	34944559	HiC_scaffold_43	5105212	5106910
HiC_scaffold_10	34949530	34955245	HiC_scaffold_43	5112619	5116563
HiC_scaffold_10	34959767	34961188	HiC_scaffold_43	5128475	5129836
HiC_scaffold_10	35074983	35075993	HiC_scaffold_43	5136608	5137662
HiC_scaffold_10	35082390	35084428	HiC_scaffold_43	5149135	5151113
HiC_scaffold_10	35090249	35093900	HiC_scaffold_43	5152181	5154739
HiC_scaffold_10	35116594	35118746	HiC_scaffold_43	5228708	5231678
HiC_scaffold_10	35336433	35340396	HiC_scaffold_43	5258450	5260439
HiC_scaffold_10	13860028	13860504	HiC_scaffold_43	21879075	21879644
HiC_scaffold_10	13951237	13955917	HiC_scaffold_43	22051247	22052832
HiC_scaffold_10	14394885	14395163	HiC_scaffold_43	22661491	22662045
HiC_scaffold_10	14585701	14588733	HiC_scaffold_43	22680300	22682961
HiC_scaffold_10	14857782	14859377	HiC_scaffold_43	23040300	23041998
HiC_scaffold_10	16070536	16070868	HiC_scaffold_43	21799502	21799882
HiC_scaffold_10	16117824	16119321	HiC_scaffold_43	22051247	22052832
HiC_scaffold_10	16567074	16567877	HiC_scaffold_43	22680300	22682961
HiC_scaffold_10	17220946	17222416	HiC_scaffold_43	23274783	23275205
HiC_scaffold_10	17378602	17379684	HiC_scaffold_43	23310075	23312104
HiC_scaffold_10	31251316	31254307	HiC_scaffold_43	37815185	37818784
HiC_scaffold_10	31367507	31372547	HiC_scaffold_43	37760237	37768348
HiC_scaffold_10	31392960	31399015	HiC_scaffold_43	37672680	37678408
HiC_scaffold_10	31522690	31525687	HiC_scaffold_43	37487189	37488735
HiC_scaffold_10	31750353	31751534	HiC_scaffold_43	37362518	37368579
HiC_scaffold_10	31778665	31778898	HiC_scaffold_43	37358572	37360697
HiC_scaffold_10	31787094	31788269	HiC_scaffold_43	37350453	37351586
HiC_scaffold_10	31895496	31897769	HiC_scaffold_43	37032773	37034845
HiC_scaffold_10	33453214	33456686	HiC_scaffold_43	4616829	4618847
HiC_scaffold_10	33459491	33461931	HiC_scaffold_43	4613381	4615981
HiC_scaffold_10	33473888	33474295	HiC_scaffold_43	4551095	4551649
HiC_scaffold_10	33476881	33480570	HiC_scaffold_43	4547151	4549643
HiC_scaffold_10	33485017	33487116	HiC_scaffold_43	4513598	4514098
HiC_scaffold_10	33618048	33620527	HiC_scaffold_43	4507118	4509325
HiC_scaffold_10	33744950	33745690	HiC_scaffold_43	4318643	4320138
HiC_scaffold_10	28310595	28315288	HiC_scaffold_43	26163122	26168219
HiC_scaffold_10	28367657	28368292	HiC_scaffold_43	25909640	25910318
HiC_scaffold_10	28378042	28379191	HiC_scaffold_43	25692003	25694228
HiC_scaffold_10	28719748	28722581	HiC_scaffold_43	25528380	25531398
HiC_scaffold_10	28797524	28801110	HiC_scaffold_43	25448470	25451823
HiC_scaffold_10	31251316	31254307	HiC_scaffold_44	178666	181427
HiC_scaffold_10	31392960	31399015	HiC_scaffold_44	334192	339919
HiC_scaffold_10	31463746	31465590	HiC_scaffold_44	363789	365624
HiC_scaffold_10	31522690	31525687	HiC_scaffold_44	453595	454684
HiC_scaffold_10	31706572	31707396	HiC_scaffold_44	528623	529306
HiC_scaffold_10	31745244	31747952	HiC_scaffold_44	556384	558309
HiC_scaffold_10	31750353	31751534	HiC_scaffold_44	570454	571662
HiC_scaffold_10	31787094	31788269	HiC_scaffold_44	585220	586362
HiC_scaffold_10	28378042	28379191	HiC_scaffold_44	9451907	9454563
HiC_scaffold_10	28719748	28722581	HiC_scaffold_44	9496621	9499657
HiC_scaffold_10	28797524	28801110	HiC_scaffold_44	9678518	9681856
HiC_scaffold_10	28941256	28945776	HiC_scaffold_44	9711836	9716221
HiC_scaffold_10	29173078	29176635	HiC_scaffold_44	9718749	9721769
HiC_scaffold_10	29553590	29572023	HiC_scaffold_44	9867917	9880719
HiC_scaffold_10	33459491	33461931	HiC_scaffold_44	36500595	36503307
HiC_scaffold_10	33473888	33474295	HiC_scaffold_44	36747914	36748504
HiC_scaffold_10	33476881	33480570	HiC_scaffold_44	36750685	36752528
HiC_scaffold_10	33485017	33487116	HiC_scaffold_44	36759869	36760369
HiC_scaffold_10	33618048	33620527	HiC_scaffold_44	36764900	36767337
HiC_scaffold_10	33744950	33745690	HiC_scaffold_44	36851589	36852463
HiC_scaffold_10	34350804	34353210	HiC_scaffold_44	36435022	36436950
HiC_scaffold_10	34398461	34404394	HiC_scaffold_44	36407348	36411798
HiC_scaffold_10	34413070	34416537	HiC_scaffold_44	36361593	36364499
HiC_scaffold_10	34578483	34580201	HiC_scaffold_44	36269020	36270844
HiC_scaffold_10	34650353	34651446	HiC_scaffold_44	36206799	36209622
HiC_scaffold_10	34667086	34669689	HiC_scaffold_44	36203704	36205145
HiC_scaffold_10	34801988	34804428	HiC_scaffold_44	36195525	36197686
HiC_scaffold_10	34944257	34944559	HiC_scaffold_44	36184808	36186599
HiC_scaffold_10	34949530	34955245	HiC_scaffold_44	36173610	36177448
HiC_scaffold_10	34959767	34961188	HiC_scaffold_44	36164920	36166287
HiC_scaffold_10	35074983	35075993	HiC_scaffold_44	36150409	36151432
HiC_scaffold_10	35082390	35084428	HiC_scaffold_44	36139593	36142047
HiC_scaffold_10	35090249	35093900	HiC_scaffold_44	36135516	36138121
HiC_scaffold_10	35116594	35118746	HiC_scaffold_44	36111158	36114191
HiC_scaffold_10	35336433	35340396	HiC_scaffold_44	35952981	35954973
HiC_scaffold_10	30737994	30738974	HiC_scaffold_44	6644070	6649136
HiC_scaffold_10	30835086	30837240	HiC_scaffold_44	6316141	6320465
HiC_scaffold_10	30853064	30857859	HiC_scaffold_44	6308838	6313937
HiC_scaffold_10	30861874	30863636	HiC_scaffold_44	6253822	6254686
HiC_scaffold_10	30868965	30872232	HiC_scaffold_44	6241261	6243552
HiC_scaffold_10	30979835	30982869	HiC_scaffold_44	6209055	6211077
HiC_scaffold_10	31061064	31063637	HiC_scaffold_44	6141563	6143702
HiC_scaffold_10	31102988	31105538	HiC_scaffold_44	6106119	6109403
HiC_scaffold_10	27969241	27972038	HiC_scaffold_44	10828006	10830887
HiC_scaffold_10	28159425	28160957	HiC_scaffold_44	10722581	10726184
HiC_scaffold_10	28163055	28164468	HiC_scaffold_44	10702941	10705133
HiC_scaffold_10	28310595	28315288	HiC_scaffold_44	10694385	10699580
HiC_scaffold_10	28367657	28368292	HiC_scaffold_44	10520639	10521642
HiC_scaffold_10	28485745	28489527	HiC_scaffold_44	10402874	10406791
HiC_scaffold_10	7151380	7151793	HiC_scaffold_47	21511417	21511794
HiC_scaffold_10	7470275	7471763	HiC_scaffold_47	21519303	21519943
HiC_scaffold_10	7830493	7833106	HiC_scaffold_47	21697949	21699121
HiC_scaffold_10	8737973	8738959	HiC_scaffold_47	22050997	22051574
HiC_scaffold_10	8869649	8871504	HiC_scaffold_47	22063983	22073074
HiC_scaffold_10	9557182	9561988	HiC_scaffold_47	22290535	22290884
HiC_scaffold_10	10080059	10082136	HiC_scaffold_47	22778083	22779661
HiC_scaffold_10	8854129	8860988	HiC_scaffold_47	46951066	46957621
HiC_scaffold_10	8869649	8871504	HiC_scaffold_47	47044582	47050739
HiC_scaffold_10	9055663	9057030	HiC_scaffold_47	47070842	47072188
HiC_scaffold_10	9059442	9060797	HiC_scaffold_47	47075160	47076803
HiC_scaffold_10	9064157	9070446	HiC_scaffold_47	47078734	47079167
HiC_scaffold_10	8869649	8871504	HiC_scaffold_49	20911988	20919149
HiC_scaffold_10	9542628	9543957	HiC_scaffold_49	21249810	21249966
HiC_scaffold_10	9666103	9666589	HiC_scaffold_49	21590848	21591154
HiC_scaffold_10	10179126	10179652	HiC_scaffold_49	21878930	21879445
HiC_scaffold_10	10202364	10202765	HiC_scaffold_49	22507974	22508127
HiC_scaffold_10	8854129	8860988	HiC_scaffold_49	2398267	2405113
HiC_scaffold_10	8869649	8871504	HiC_scaffold_49	2384848	2386997
HiC_scaffold_10	9055663	9057030	HiC_scaffold_49	2358661	2360497
HiC_scaffold_10	9059442	9060797	HiC_scaffold_49	2353632	2353979
HiC_scaffold_10	9064157	9070446	HiC_scaffold_49	2345558	2350659
HiC_scaffold_10	15127790	15129600	HiC_scaffold_5	6307456	6309590
HiC_scaffold_10	15930081	15930336	HiC_scaffold_5	6487554	6489565
HiC_scaffold_10	16207712	16208635	HiC_scaffold_5	7116936	7119228
HiC_scaffold_10	16928112	16929325	HiC_scaffold_5	7478406	7479766
HiC_scaffold_10	17017194	17018736	HiC_scaffold_5	7830384	7830902
HiC_scaffold_10	14490173	14490688	HiC_scaffold_5	7478406	7479766
HiC_scaffold_10	15127790	15129600	HiC_scaffold_5	7029079	7029699
HiC_scaffold_10	15930081	15930336	HiC_scaffold_5	6487554	6489565
HiC_scaffold_10	16117824	16119321	HiC_scaffold_5	6307456	6309590
HiC_scaffold_10	16207712	16208635	HiC_scaffold_5	6210101	6210741
HiC_scaffold_10	4950157	4950963	HiC_scaffold_50	999128	999440
HiC_scaffold_10	5223865	5229888	HiC_scaffold_50	880078	890240
HiC_scaffold_10	5507275	5509303	HiC_scaffold_50	868721	871254
HiC_scaffold_10	5626619	5629011	HiC_scaffold_50	843302	846147
HiC_scaffold_10	5899768	5903281	HiC_scaffold_50	415003	418274
HiC_scaffold_10	20766602	20770250	HiC_scaffold_51	21114631	21117381
HiC_scaffold_10	21068049	21069354	HiC_scaffold_51	21698233	21698784
HiC_scaffold_10	21420260	21420938	HiC_scaffold_51	21870981	21871640
HiC_scaffold_10	21426513	21429612	HiC_scaffold_51	21968241	21968990
HiC_scaffold_10	21609633	21609995	HiC_scaffold_51	22410078	22411043
HiC_scaffold_10	21962921	21964820	HiC_scaffold_51	22598414	22599686
HiC_scaffold_10	19592757	19594859	HiC_scaffold_54	17591925	17593316
HiC_scaffold_10	19980679	19981687	HiC_scaffold_54	17466542	17468107
HiC_scaffold_10	20528548	20529279	HiC_scaffold_54	17370913	17371066
HiC_scaffold_10	20881042	20882644	HiC_scaffold_54	17191565	17193756
HiC_scaffold_10	21068049	21069354	HiC_scaffold_54	17010012	17013437
HiC_scaffold_10	15849143	15849638	HiC_scaffold_6	22329041	22329822
HiC_scaffold_10	16117824	16119321	HiC_scaffold_6	22860766	22861920
HiC_scaffold_10	16207712	16208635	HiC_scaffold_6	23400324	23401037
HiC_scaffold_10	16567074	16567877	HiC_scaffold_6	23671866	23672573
HiC_scaffold_10	16928112	16929325	HiC_scaffold_6	24300652	24302872
HiC_scaffold_10	17378602	17379684	HiC_scaffold_6	24938091	24939869
HiC_scaffold_10	17829069	17829440	HiC_scaffold_6	25110203	25111348
HiC_scaffold_10	33453214	33456686	HiC_scaffold_8	5616169	5619656
HiC_scaffold_10	33459491	33461931	HiC_scaffold_8	5704936	5705340
HiC_scaffold_10	33473888	33474295	HiC_scaffold_8	5730949	5731356
HiC_scaffold_10	33485017	33487116	HiC_scaffold_8	5741313	5741813
HiC_scaffold_10	33493197	33503363	HiC_scaffold_8	5746953	5757059
HiC_scaffold_10	33504218	33507905	HiC_scaffold_8	5758080	5761773
HiC_scaffold_10	33548372	33550843	HiC_scaffold_8	5885100	5887549
HiC_scaffold_10	33646877	33657092	HiC_scaffold_8	5903627	5915971
HiC_scaffold_10	33659814	33661574	HiC_scaffold_8	5915999	5917744
HiC_scaffold_10	33662316	33668756	HiC_scaffold_8	5918486	5923945
HiC_scaffold_10	33697269	33698630	HiC_scaffold_8	6013017	6014437
HiC_scaffold_10	33719523	33721046	HiC_scaffold_8	6025625	6027352
HiC_scaffold_10	33744950	33745690	HiC_scaffold_8	6034618	6036984
HiC_scaffold_10	33833367	33842726	HiC_scaffold_8	6043109	6049801
HiC_scaffold_10	33843610	33845741	HiC_scaffold_8	6053250	6055415
HiC_scaffold_10	33870394	33877605	HiC_scaffold_8	6097930	6105091
HiC_scaffold_10	33886031	33886477	HiC_scaffold_8	6109144	6109590
HiC_scaffold_10	33903343	33906912	HiC_scaffold_8	6117860	6127287
HiC_scaffold_10	33913069	33919293	HiC_scaffold_8	6128271	6133632
HiC_scaffold_10	33933177	33936437	HiC_scaffold_8	6142596	6146358
HiC_scaffold_10	33952979	33960420	HiC_scaffold_8	6160782	6165477
HiC_scaffold_10	33981390	33982115	HiC_scaffold_8	6185078	6186433
HiC_scaffold_10	33983141	33985391	HiC_scaffold_8	6186841	6189094
HiC_scaffold_10	33994843	33999450	HiC_scaffold_8	6193571	6198248
HiC_scaffold_10	34000835	34004253	HiC_scaffold_8	6199158	6202568
HiC_scaffold_10	34006944	34009308	HiC_scaffold_8	6209133	6211130
HiC_scaffold_10	34027903	34032698	HiC_scaffold_8	6252897	6257918
HiC_scaffold_10	34052320	34060364	HiC_scaffold_8	6260558	6280772
HiC_scaffold_10	34080206	34082131	HiC_scaffold_8	6294023	6295924
HiC_scaffold_10	34084018	34084608	HiC_scaffold_8	6298637	6299416
HiC_scaffold_10	34091028	34100581	HiC_scaffold_8	6318234	6321417
HiC_scaffold_10	34103963	34105708	HiC_scaffold_8	6326262	6328007
HiC_scaffold_10	34137644	34140873	HiC_scaffold_8	6346191	6358548
HiC_scaffold_10	34179769	34181588	HiC_scaffold_8	6362108	6363886
HiC_scaffold_10	34182417	34184942	HiC_scaffold_8	6364295	6366598
HiC_scaffold_10	34204489	34204941	HiC_scaffold_8	6391532	6394160
HiC_scaffold_10	34210045	34215704	HiC_scaffold_8	6414056	6419608
HiC_scaffold_10	737926	742261	HiC_scaffold_8	38194293	38198133
HiC_scaffold_10	743042	744709	HiC_scaffold_8	38213591	38216205
HiC_scaffold_10	772206	772823	HiC_scaffold_8	38224155	38225173
HiC_scaffold_10	798841	801347	HiC_scaffold_8	38225194	38226380
HiC_scaffold_10	809367	811731	HiC_scaffold_8	38243799	38244155
HiC_scaffold_10	819165	822310	HiC_scaffold_8	38250407	38251026
HiC_scaffold_10	823313	825895	HiC_scaffold_8	38253979	38256562
HiC_scaffold_10	833401	847787	HiC_scaffold_8	38271416	38285953
HiC_scaffold_10	852450	857197	HiC_scaffold_8	38290715	38295460
HiC_scaffold_10	913984	921742	HiC_scaffold_8	38332166	38333154
HiC_scaffold_10	926541	929345	HiC_scaffold_8	38579021	38582432
HiC_scaffold_10	1107177	1110515	HiC_scaffold_8	38619745	38623032
HiC_scaffold_10	1115853	1117810	HiC_scaffold_8	38624949	38627069
HiC_scaffold_10	1282787	1285260	HiC_scaffold_8	38635274	38636444
HiC_scaffold_10	1285917	1292355	HiC_scaffold_8	38637101	38643915
HiC_scaffold_10	1319887	1322597	HiC_scaffold_8	38664118	38667071
HiC_scaffold_10	1322984	1326110	HiC_scaffold_8	38667960	38671241
HiC_scaffold_10	1333241	1334993	HiC_scaffold_8	38720426	38722445
HiC_scaffold_10	1336090	1337512	HiC_scaffold_8	38723291	38726313
HiC_scaffold_10	24393729	24403004	HiC_scaffold_8	16454503	16462845
HiC_scaffold_10	24536811	24537503	HiC_scaffold_8	16489480	16490172
HiC_scaffold_10	24584194	24584421	HiC_scaffold_8	16497136	16497564
HiC_scaffold_10	24599719	24600135	HiC_scaffold_8	16568462	16568755
HiC_scaffold_10	24756545	24758560	HiC_scaffold_8	16648669	16649037
HiC_scaffold_10	24764073	24769635	HiC_scaffold_8	16651753	16659261
HiC_scaffold_10	24773885	24775467	HiC_scaffold_8	16662196	16665519
HiC_scaffold_10	24779637	24783713	HiC_scaffold_8	16686670	16689897
HiC_scaffold_10	24806683	24809177	HiC_scaffold_8	16718523	16722816
HiC_scaffold_10	24825018	24825431	HiC_scaffold_8	16730241	16730469
HiC_scaffold_10	24903943	24904398	HiC_scaffold_8	16771426	16771890
HiC_scaffold_10	25037885	25045585	HiC_scaffold_8	16797410	16806447
HiC_scaffold_10	25208901	25213579	HiC_scaffold_8	16850175	16854687
HiC_scaffold_10	3011096	3012890	HiC_scaffold_8	36120252	36121746
HiC_scaffold_10	3069123	3069301	HiC_scaffold_8	36450158	36450544
HiC_scaffold_10	3210979	3213746	HiC_scaffold_8	36895753	36896451
HiC_scaffold_10	3221856	3225446	HiC_scaffold_8	36899919	36903968
HiC_scaffold_10	3265233	3267383	HiC_scaffold_8	36920112	36922161
HiC_scaffold_10	3279550	3283096	HiC_scaffold_8	36934840	36938199
HiC_scaffold_10	3285370	3293097	HiC_scaffold_8	36943975	36951779
HiC_scaffold_10	3321833	3322015	HiC_scaffold_8	37087147	37087319
HiC_scaffold_10	3449142	3451238	HiC_scaffold_8	37148025	37151252
HiC_scaffold_10	3454964	3472973	HiC_scaffold_8	37155419	37169176
HiC_scaffold_10	3518727	3522634	HiC_scaffold_8	37214953	37218927
HiC_scaffold_10	3608017	3610757	HiC_scaffold_8	37223495	37225310
HiC_scaffold_10	3977920	3982320	HiC_scaffold_8	37323207	37325700
HiC_scaffold_10	4266134	4267399	HiC_scaffold_8	37550355	37551832
HiC_scaffold_10	4269037	4273418	HiC_scaffold_8	37553854	37558429
HiC_scaffold_10	4274286	4276707	HiC_scaffold_8	37559302	37561359
HiC_scaffold_10	4278011	4280584	HiC_scaffold_8	37562603	37565554
HiC_scaffold_10	4483244	4489422	HiC_scaffold_8	37673318	37678366
HiC_scaffold_10	4901791	4903042	HiC_scaffold_8	37725699	37728102
HiC_scaffold_10	4933440	4937034	HiC_scaffold_8	37775401	37779630
HiC_scaffold_10	5472302	5472547	HiC_scaffold_8	38071026	38074601
HiC_scaffold_10	5507275	5509303	HiC_scaffold_8	38123605	38125272
HiC_scaffold_10	9990107	9991442	HiC_scaffold_8	28768739	28769535
HiC_scaffold_10	9992390	9996102	HiC_scaffold_8	28770769	28771649
HiC_scaffold_10	10208842	10210179	HiC_scaffold_8	28993799	28994947
HiC_scaffold_10	10324054	10325972	HiC_scaffold_8	29312081	29314607
HiC_scaffold_10	10354605	10357256	HiC_scaffold_8	29345435	29351304
HiC_scaffold_10	10554090	10555503	HiC_scaffold_8	29573553	29575081
HiC_scaffold_10	10758076	10761346	HiC_scaffold_8	29666872	29670333
HiC_scaffold_10	11065196	11068120	HiC_scaffold_8	29808767	29812033
HiC_scaffold_10	11278613	11288305	HiC_scaffold_8	29926741	29936520
HiC_scaffold_10	11452002	11457454	HiC_scaffold_8	30069137	30074665
HiC_scaffold_10	39107	42048	HiC_scaffold_8	34992301	34995241
HiC_scaffold_10	88035	90032	HiC_scaffold_8	35000777	35003650
HiC_scaffold_10	136127	142107	HiC_scaffold_8	35090851	35097067
HiC_scaffold_10	174019	178358	HiC_scaffold_8	35118247	35119783
HiC_scaffold_10	216861	219703	HiC_scaffold_8	35269304	35272446
HiC_scaffold_10	270690	271432	HiC_scaffold_8	35735215	35737479
HiC_scaffold_10	349587	350627	HiC_scaffold_8	35806943	35808904
HiC_scaffold_10	353572	360246	HiC_scaffold_8	35951829	35954158
HiC_scaffold_10	22456005	22461588	HiC_scaffold_8	17692573	17697748
HiC_scaffold_10	22463076	22468807	HiC_scaffold_8	17699284	17704567
HiC_scaffold_10	22571735	22572982	HiC_scaffold_8	17727513	17732626
HiC_scaffold_10	22661773	22669414	HiC_scaffold_8	17761162	17768925
HiC_scaffold_10	22789486	22791906	HiC_scaffold_8	17877011	17879326
HiC_scaffold_10	22999407	23015665	HiC_scaffold_8	17996032	17999416
HiC_scaffold_10	23021741	23023785	HiC_scaffold_8	18031172	18035013
HiC_scaffold_10	14968717	14969385	HiC_scaffold_8	24876198	24876683
HiC_scaffold_10	15037127	15039658	HiC_scaffold_8	25020637	25022158
HiC_scaffold_10	15284361	15284867	HiC_scaffold_8	25274037	25274747
HiC_scaffold_10	16056107	16057895	HiC_scaffold_8	25667236	25669045
HiC_scaffold_10	16117824	16119321	HiC_scaffold_8	25920250	25921733
HiC_scaffold_10	16273438	16278994	HiC_scaffold_8	26532621	26538539
HiC_scaffold_10	16407979	16409983	HiC_scaffold_8	26942727	26943855
HiC_scaffold_10	16567074	16567877	HiC_scaffold_8	27000596	27002929
HiC_scaffold_10	35100938	35102357	HiC_scaffold_8	4140454	4141311
HiC_scaffold_10	35288228	35290350	HiC_scaffold_8	4232619	4237744
HiC_scaffold_10	35300816	35303509	HiC_scaffold_8	4254591	4259393
HiC_scaffold_10	35334417	35334875	HiC_scaffold_8	4275302	4278907
HiC_scaffold_10	35336433	35340396	HiC_scaffold_8	4285152	4289075
HiC_scaffold_10	35342567	35342979	HiC_scaffold_8	4292149	4294172
HiC_scaffold_10	2024938	2027929	HiC_scaffold_8	35969860	35974560
HiC_scaffold_10	2032035	2034548	HiC_scaffold_8	35979489	35981991
HiC_scaffold_10	2070659	2076936	HiC_scaffold_8	36011017	36016392
HiC_scaffold_10	2125995	2127624	HiC_scaffold_8	36120252	36121746
HiC_scaffold_10	2260656	2261262	HiC_scaffold_8	36175082	36175339
HiC_scaffold_10	2645245	2648010	HiC_scaffold_8	36895753	36896451
HiC_scaffold_10	7754277	7756202	HiC_scaffold_8	33727337	33729512
HiC_scaffold_10	7830493	7833106	HiC_scaffold_8	33750398	33750865
HiC_scaffold_10	7920227	7931198	HiC_scaffold_8	33886855	33898090
HiC_scaffold_10	8239758	8240771	HiC_scaffold_8	34077769	34080151
HiC_scaffold_10	8275910	8279853	HiC_scaffold_8	34421261	34424709
HiC_scaffold_10	13688875	13689850	HiC_scaffold_8	27000596	27002929
HiC_scaffold_10	13769329	13771082	HiC_scaffold_8	27545017	27548365
HiC_scaffold_10	14006359	14008143	HiC_scaffold_8	27771842	27773848
HiC_scaffold_10	14490173	14490688	HiC_scaffold_8	27997908	27999654
HiC_scaffold_10	14585701	14588733	HiC_scaffold_8	28532719	28535216
HiC_scaffold_10	13951237	13955917	HiC_scaffold_8	29430975	29431584
HiC_scaffold_10	14217281	14217547	HiC_scaffold_8	30186761	30187941
HiC_scaffold_10	14490173	14490688	HiC_scaffold_8	30338798	30339802
HiC_scaffold_10	14679472	14679814	HiC_scaffold_8	30780507	30780859
HiC_scaffold_10	15127790	15129600	HiC_scaffold_8	31685823	31688917
HiC_scaffold_10	25519732	25520980	HiC_scaffold_8	16115461	16116201
HiC_scaffold_10	25522498	25526606	HiC_scaffold_8	15879097	15883292
HiC_scaffold_10	25579999	25584132	HiC_scaffold_8	15834621	15838748
HiC_scaffold_10	25608999	25612692	HiC_scaffold_8	15588350	15592009
HiC_scaffold_10	25677174	25679831	HiC_scaffold_8	15572557	15575741
HiC_scaffold_10	25742652	25743956	HiC_scaffold_8	15554678	15560793
HiC_scaffold_10	25757127	25759723	HiC_scaffold_8	15533771	15536368
HiC_scaffold_10	25793502	25795879	HiC_scaffold_8	15526881	15527575
HiC_scaffold_10	25798425	25799293	HiC_scaffold_8	15522261	15523482
HiC_scaffold_10	25812001	25813142	HiC_scaffold_8	15512739	15513864
HiC_scaffold_10	25813640	25815448	HiC_scaffold_8	15510727	15512107
HiC_scaffold_10	25818919	25821617	HiC_scaffold_8	15501219	15503988
HiC_scaffold_10	25984864	25987473	HiC_scaffold_8	15448014	15452998
HiC_scaffold_10	26011424	26012047	HiC_scaffold_8	15415475	15417346
HiC_scaffold_10	26013744	26018108	HiC_scaffold_8	15340219	15343647
HiC_scaffold_10	26038883	26048162	HiC_scaffold_8	15293540	15302399
HiC_scaffold_10	26064872	26070305	HiC_scaffold_8	15280732	15285719
HiC_scaffold_10	26080214	26084848	HiC_scaffold_8	15267553	15271959
HiC_scaffold_10	26096655	26098532	HiC_scaffold_8	15256848	15260426
HiC_scaffold_10	26111243	26114728	HiC_scaffold_8	15248009	15251352
HiC_scaffold_10	26212141	26216481	HiC_scaffold_8	15040499	15044565
HiC_scaffold_10	26260458	26262365	HiC_scaffold_8	15015747	15017660
HiC_scaffold_10	26399980	26405199	HiC_scaffold_8	14970229	14974187
HiC_scaffold_10	26412321	26428165	HiC_scaffold_8	14922690	14938424
HiC_scaffold_10	26441823	26444823	HiC_scaffold_8	14912457	14915877
HiC_scaffold_10	26486118	26489062	HiC_scaffold_8	14834993	14838170
HiC_scaffold_10	26501640	26505800	HiC_scaffold_8	14809083	14813230
HiC_scaffold_10	26650968	26651772	HiC_scaffold_8	14804813	14805615
HiC_scaffold_10	26746342	26751166	HiC_scaffold_8	14672269	14677056
HiC_scaffold_10	26752428	26757024	HiC_scaffold_8	14666649	14671085
HiC_scaffold_10	26829868	26837121	HiC_scaffold_8	14631572	14637164
HiC_scaffold_10	26960709	26962002	HiC_scaffold_8	14581820	14583702
HiC_scaffold_10	26978106	26981430	HiC_scaffold_8	14559983	14563298
HiC_scaffold_10	27045333	27045857	HiC_scaffold_8	14493363	14493830
HiC_scaffold_10	27067246	27070127	HiC_scaffold_8	14477732	14481935
HiC_scaffold_10	27086746	27087312	HiC_scaffold_8	14458377	14458940
HiC_scaffold_10	27162977	27165418	HiC_scaffold_8	14417515	14419975
HiC_scaffold_10	27209920	27211602	HiC_scaffold_8	14230582	14232443
HiC_scaffold_10	27216392	27221262	HiC_scaffold_8	14124778	14128018
HiC_scaffold_10	27228162	27230906	HiC_scaffold_8	14105315	14111193
HiC_scaffold_10	27264348	27268304	HiC_scaffold_8	14038124	14039949
HiC_scaffold_10	27275467	27275672	HiC_scaffold_8	14025699	14025904
HiC_scaffold_10	27276615	27280554	HiC_scaffold_8	14020437	14024701
HiC_scaffold_10	27281517	27286407	HiC_scaffold_8	14009448	14014363
HiC_scaffold_10	27328182	27333221	HiC_scaffold_8	13974489	13976299
HiC_scaffold_10	27339187	27346693	HiC_scaffold_8	13958856	13966887
HiC_scaffold_10	27385243	27386037	HiC_scaffold_8	13926339	13927133
HiC_scaffold_10	27408547	27408951	HiC_scaffold_8	13878427	13878831
HiC_scaffold_10	27449935	27451644	HiC_scaffold_8	13807797	13809503
HiC_scaffold_10	27574634	27580207	HiC_scaffold_8	13632575	13651279
HiC_scaffold_10	27623413	27623769	HiC_scaffold_8	13531169	13534587
HiC_scaffold_10	27754762	27756548	HiC_scaffold_8	13379959	13382434
HiC_scaffold_10	27763092	27766375	HiC_scaffold_8	13366262	13368203
HiC_scaffold_10	27805290	27806608	HiC_scaffold_8	13235018	13236574
HiC_scaffold_10	27816463	27817843	HiC_scaffold_8	13193407	13194166
HiC_scaffold_10	27969241	27972038	HiC_scaffold_8	13061613	13064408
HiC_scaffold_10	28159425	28160957	HiC_scaffold_8	13039073	13040120
HiC_scaffold_10	28163055	28164468	HiC_scaffold_8	13034766	13035375
HiC_scaffold_10	28255349	28255688	HiC_scaffold_8	12774927	12775339
HiC_scaffold_10	28294549	28298246	HiC_scaffold_8	12738485	12742150
HiC_scaffold_10	28304631	28309384	HiC_scaffold_8	12734253	12736993
HiC_scaffold_10	28310595	28315288	HiC_scaffold_8	12720016	12731190
HiC_scaffold_10	28328301	28330896	HiC_scaffold_8	12691207	12697754
HiC_scaffold_10	28361280	28367225	HiC_scaffold_8	12676179	12682084
HiC_scaffold_10	28367657	28368292	HiC_scaffold_8	12675070	12675705
HiC_scaffold_10	28378042	28379191	HiC_scaffold_8	12660019	12662361
HiC_scaffold_10	28389179	28390373	HiC_scaffold_8	12632998	12640327
HiC_scaffold_10	28429676	28434377	HiC_scaffold_8	12590397	12595165
HiC_scaffold_10	28472489	28473112	HiC_scaffold_8	12513586	12514197
HiC_scaffold_10	28485745	28489527	HiC_scaffold_8	12370358	12374690
HiC_scaffold_10	28577848	28627974	HiC_scaffold_8	12339170	12344046
HiC_scaffold_10	28669073	28672589	HiC_scaffold_8	12235918	12239924
HiC_scaffold_10	28697612	28701119	HiC_scaffold_8	12211057	12215161
HiC_scaffold_10	28710236	28718258	HiC_scaffold_8	12202842	12210473
HiC_scaffold_10	28719748	28722581	HiC_scaffold_8	12198457	12201291
HiC_scaffold_10	28805603	28807405	HiC_scaffold_8	12118065	12119895
HiC_scaffold_10	28911627	28915058	HiC_scaffold_8	12020475	12023836
HiC_scaffold_10	28925790	28929688	HiC_scaffold_8	12013958	12019324
HiC_scaffold_10	28941256	28945776	HiC_scaffold_8	11932190	11935011
HiC_scaffold_10	28947087	28947614	HiC_scaffold_8	11929244	11929771
HiC_scaffold_10	29049308	29049807	HiC_scaffold_8	11750376	11750870
HiC_scaffold_10	29295880	29298267	HiC_scaffold_8	11560069	11563861
HiC_scaffold_10	29341334	29347473	HiC_scaffold_8	11387269	11393537
HiC_scaffold_10	29353230	29357009	HiC_scaffold_8	11365498	11366802
HiC_scaffold_10	29364564	29365529	HiC_scaffold_8	11297362	11298306
HiC_scaffold_10	29379237	29381092	HiC_scaffold_8	11288750	11290147
HiC_scaffold_10	29446874	29447404	HiC_scaffold_8	11221986	11222471
HiC_scaffold_10	29533800	29535431	HiC_scaffold_8	11211694	11212851
HiC_scaffold_10	29539850	29541034	HiC_scaffold_8	11204599	11205931
HiC_scaffold_10	29543302	29549670	HiC_scaffold_8	11195080	11200244
HiC_scaffold_10	29553590	29572023	HiC_scaffold_8	11178374	11189826
HiC_scaffold_10	29588416	29589276	HiC_scaffold_8	11006284	11006991
HiC_scaffold_10	29595768	29597108	HiC_scaffold_8	10996998	10998335
HiC_scaffold_10	29673726	29676197	HiC_scaffold_8	10940785	10943038
HiC_scaffold_10	29756087	29758359	HiC_scaffold_8	10899601	10902417
HiC_scaffold_10	29909793	29912958	HiC_scaffold_8	10739730	10742308
HiC_scaffold_10	29913981	29918027	HiC_scaffold_8	10734360	10739622
HiC_scaffold_10	29948838	29951829	HiC_scaffold_8	10694309	10697272
HiC_scaffold_10	30078112	30085714	HiC_scaffold_8	10520327	10528512
HiC_scaffold_10	30103991	30106885	HiC_scaffold_8	10513112	10515982
HiC_scaffold_10	30119731	30121753	HiC_scaffold_8	10461503	10463408
HiC_scaffold_10	30144339	30147615	HiC_scaffold_8	10423299	10426155
HiC_scaffold_10	30149214	30151529	HiC_scaffold_8	10418024	10420588
HiC_scaffold_10	30153767	30157448	HiC_scaffold_8	10412093	10415912
HiC_scaffold_10	30208121	30208594	HiC_scaffold_8	10345680	10346816
HiC_scaffold_10	30216475	30218856	HiC_scaffold_8	10331312	10333672
HiC_scaffold_10	30239775	30244519	HiC_scaffold_8	10288407	10292104
HiC_scaffold_10	30293056	30294729	HiC_scaffold_8	10277373	10277588
HiC_scaffold_10	30328303	30329670	HiC_scaffold_8	10175460	10179776
HiC_scaffold_10	30342608	30349283	HiC_scaffold_8	10158070	10159742
HiC_scaffold_10	30398327	30399994	HiC_scaffold_8	10074770	10077170
HiC_scaffold_10	30412406	30415567	HiC_scaffold_8	10063484	10065211
HiC_scaffold_10	30416842	30419898	HiC_scaffold_8	10059387	10062235
HiC_scaffold_10	30441418	30443905	HiC_scaffold_8	10020177	10023194
HiC_scaffold_10	30447928	30450575	HiC_scaffold_8	10014699	10018789
HiC_scaffold_10	30462418	30467181	HiC_scaffold_8	9974590	9979608
HiC_scaffold_10	30470211	30472412	HiC_scaffold_8	9967566	9972699
HiC_scaffold_10	30481130	30484663	HiC_scaffold_8	9959526	9963020
HiC_scaffold_10	30541396	30542799	HiC_scaffold_8	9891307	9892737
HiC_scaffold_10	30582902	30584326	HiC_scaffold_8	9776526	9777950
HiC_scaffold_10	30587769	30591973	HiC_scaffold_8	9771181	9773714
HiC_scaffold_10	30607528	30608669	HiC_scaffold_8	9747288	9748595
HiC_scaffold_10	30614449	30616243	HiC_scaffold_8	9720260	9722066
HiC_scaffold_10	30617188	30621409	HiC_scaffold_8	9715898	9719399
HiC_scaffold_10	30623718	30626940	HiC_scaffold_8	9691336	9692063
HiC_scaffold_10	30804653	30805612	HiC_scaffold_8	9654763	9658267
HiC_scaffold_10	30835086	30837240	HiC_scaffold_8	9647372	9652022
HiC_scaffold_10	30853064	30857859	HiC_scaffold_8	9568299	9573193
HiC_scaffold_10	30861874	30863636	HiC_scaffold_8	9557973	9562263
HiC_scaffold_10	30868965	30872232	HiC_scaffold_8	9538776	9541886
HiC_scaffold_10	30878380	30880817	HiC_scaffold_8	9531819	9534294
HiC_scaffold_10	30899787	30902998	HiC_scaffold_8	9487680	9490464
HiC_scaffold_10	30904683	30907447	HiC_scaffold_8	9483058	9485819
HiC_scaffold_10	30935647	30935871	HiC_scaffold_8	9443319	9447027
HiC_scaffold_10	30977472	30977762	HiC_scaffold_8	9333526	9333789
HiC_scaffold_10	30979835	30982869	HiC_scaffold_8	9329975	9331984
HiC_scaffold_10	30998417	30999481	HiC_scaffold_8	9288229	9289293
HiC_scaffold_10	31056373	31059028	HiC_scaffold_8	9227973	9230756
HiC_scaffold_10	31061064	31063637	HiC_scaffold_8	9223615	9226103
HiC_scaffold_10	31102988	31105538	HiC_scaffold_8	8941813	8948814
HiC_scaffold_10	31211005	31212888	HiC_scaffold_8	8911351	8913250
HiC_scaffold_10	31251316	31254307	HiC_scaffold_8	8868907	8872050
HiC_scaffold_10	31274048	31285528	HiC_scaffold_8	8840763	8860162
HiC_scaffold_10	31286752	31291987	HiC_scaffold_8	8828505	8833756
HiC_scaffold_10	31334574	31336476	HiC_scaffold_8	8747846	8750167
HiC_scaffold_10	31362362	31366332	HiC_scaffold_8	8730582	8734530
HiC_scaffold_10	31367507	31372547	HiC_scaffold_8	8724234	8729222
HiC_scaffold_10	31392960	31399015	HiC_scaffold_8	8708099	8714318
HiC_scaffold_10	31409822	31412991	HiC_scaffold_8	8687729	8691389
HiC_scaffold_10	31458011	31461706	HiC_scaffold_8	8521878	8525918
HiC_scaffold_10	31463746	31465590	HiC_scaffold_8	8518211	8520070
HiC_scaffold_10	31496469	31499461	HiC_scaffold_8	8415078	8421976
HiC_scaffold_10	31602292	31606526	HiC_scaffold_8	8407880	8411979
HiC_scaffold_10	31607195	31607419	HiC_scaffold_8	8406983	8407207
HiC_scaffold_10	31638525	31647421	HiC_scaffold_8	8350277	8353173
HiC_scaffold_10	31648780	31650936	HiC_scaffold_8	8346558	8348701
HiC_scaffold_10	31653713	31658201	HiC_scaffold_8	8339557	8344019
HiC_scaffold_10	31665137	31665589	HiC_scaffold_8	8331807	8332250
HiC_scaffold_10	31706572	31707396	HiC_scaffold_8	8304522	8305343
HiC_scaffold_10	31737401	31738431	HiC_scaffold_8	8240619	8241655
HiC_scaffold_10	31745244	31747952	HiC_scaffold_8	8208144	8211086
HiC_scaffold_10	31750353	31751534	HiC_scaffold_8	8185191	8186384
HiC_scaffold_10	31754916	31755448	HiC_scaffold_8	8181542	8183308
HiC_scaffold_10	31756947	31763120	HiC_scaffold_8	8173858	8180052
HiC_scaffold_10	31787094	31788269	HiC_scaffold_8	8158703	8159878
HiC_scaffold_10	31826099	31832618	HiC_scaffold_8	8100807	8107359
HiC_scaffold_10	31895496	31897769	HiC_scaffold_8	8095529	8097924
HiC_scaffold_10	31927357	31929571	HiC_scaffold_8	8036332	8038757
HiC_scaffold_10	31946844	31949073	HiC_scaffold_8	7832777	7834878
HiC_scaffold_10	31953094	31955591	HiC_scaffold_8	7818592	7822856
HiC_scaffold_10	31956516	31957994	HiC_scaffold_8	7816099	7816660
HiC_scaffold_10	31959693	31961900	HiC_scaffold_8	7812235	7814464
HiC_scaffold_10	31964374	31967769	HiC_scaffold_8	7806880	7810315
HiC_scaffold_10	31971579	31981077	HiC_scaffold_8	7803395	7803769
HiC_scaffold_10	31989713	31992357	HiC_scaffold_8	7768092	7770648
HiC_scaffold_10	32018565	32019851	HiC_scaffold_8	7714687	7719571
HiC_scaffold_10	32022818	32024535	HiC_scaffold_8	7697085	7702001
HiC_scaffold_10	32025877	32027338	HiC_scaffold_8	7694197	7695774
HiC_scaffold_10	32037003	32037461	HiC_scaffold_8	7641209	7641607
HiC_scaffold_10	32038844	32040382	HiC_scaffold_8	7638411	7639580
HiC_scaffold_10	32042564	32046181	HiC_scaffold_8	7619753	7633075
HiC_scaffold_10	32163272	32168408	HiC_scaffold_8	7578408	7582524
HiC_scaffold_10	32195160	32195651	HiC_scaffold_8	7571378	7571869
HiC_scaffold_10	32200086	32203688	HiC_scaffold_8	7556473	7558425
HiC_scaffold_10	32204893	32208088	HiC_scaffold_8	7551602	7554759
HiC_scaffold_10	32208376	32210536	HiC_scaffold_8	7550760	7551314
HiC_scaffold_10	32213792	32214070	HiC_scaffold_8	7542410	7542724
HiC_scaffold_10	32240070	32248080	HiC_scaffold_8	7516741	7524891
HiC_scaffold_10	32253320	32266689	HiC_scaffold_8	7489184	7494364
HiC_scaffold_10	32267026	32274028	HiC_scaffold_8	7472764	7479938
HiC_scaffold_10	32277633	32281571	HiC_scaffold_8	7467519	7471059
HiC_scaffold_10	32302859	32306328	HiC_scaffold_8	7401100	7404410
HiC_scaffold_10	32317702	32320233	HiC_scaffold_8	7373574	7378048
HiC_scaffold_10	32337236	32338187	HiC_scaffold_8	7334164	7335109
HiC_scaffold_10	32347051	32347632	HiC_scaffold_8	7321585	7322151
HiC_scaffold_10	32359597	32362559	HiC_scaffold_8	7303518	7306553
HiC_scaffold_10	32373576	32374367	HiC_scaffold_8	7296344	7297135
HiC_scaffold_10	32377020	32378734	HiC_scaffold_8	7286182	7288789
HiC_scaffold_10	32380013	32384630	HiC_scaffold_8	7279840	7284561
HiC_scaffold_10	32389724	32392453	HiC_scaffold_8	7274764	7277414
HiC_scaffold_10	32407006	32416208	HiC_scaffold_8	7258349	7268553
HiC_scaffold_10	32422650	32422955	HiC_scaffold_8	7253549	7253878
HiC_scaffold_10	32472327	32475379	HiC_scaffold_8	7215012	7217672
HiC_scaffold_10	32487170	32494362	HiC_scaffold_8	7204752	7212549
HiC_scaffold_10	32501860	32514908	HiC_scaffold_8	7160873	7175906
HiC_scaffold_10	32518015	32518746	HiC_scaffold_8	7147195	7148016
HiC_scaffold_10	32585199	32590034	HiC_scaffold_8	7117004	7121957
HiC_scaffold_10	32612528	32615888	HiC_scaffold_8	7102271	7105587
HiC_scaffold_10	32616537	32620354	HiC_scaffold_8	7097744	7101589
HiC_scaffold_10	32621136	32621363	HiC_scaffold_8	7091763	7091990
HiC_scaffold_10	32621693	32623456	HiC_scaffold_8	7078001	7079759
HiC_scaffold_10	32624410	32626376	HiC_scaffold_8	7074832	7077222
HiC_scaffold_10	32627305	32628768	HiC_scaffold_8	7071935	7073938
HiC_scaffold_10	32631171	32631569	HiC_scaffold_8	7063279	7063849
HiC_scaffold_10	32643983	32645524	HiC_scaffold_8	7052664	7054766
HiC_scaffold_10	32648077	32649765	HiC_scaffold_8	7041031	7042875
HiC_scaffold_10	32666235	32670307	HiC_scaffold_8	6998933	7000013
HiC_scaffold_10	32672267	32675368	HiC_scaffold_8	6994661	6997761
HiC_scaffold_10	32677619	32679556	HiC_scaffold_8	6990067	6993046
HiC_scaffold_10	32682218	32683700	HiC_scaffold_8	6987994	6989135
HiC_scaffold_10	32684351	32686649	HiC_scaffold_8	6986779	6987357
HiC_scaffold_10	32688534	32689793	HiC_scaffold_8	6948883	6949954
HiC_scaffold_10	32716730	32719919	HiC_scaffold_8	6926427	6930346
HiC_scaffold_10	32740576	32745681	HiC_scaffold_8	6880841	6887149
HiC_scaffold_10	32746696	32748284	HiC_scaffold_8	6879177	6880798
HiC_scaffold_10	32755007	32762586	HiC_scaffold_8	6867373	6876448
HiC_scaffold_10	32789564	32790292	HiC_scaffold_8	6854425	6855147
HiC_scaffold_10	32793529	32794692	HiC_scaffold_8	6841475	6845043
HiC_scaffold_10	32816534	32817511	HiC_scaffold_8	6832421	6832888
HiC_scaffold_10	32846348	32850953	HiC_scaffold_8	6786388	6791569
HiC_scaffold_10	32852428	32853059	HiC_scaffold_8	6784229	6786131
HiC_scaffold_10	32950645	32953804	HiC_scaffold_8	6767612	6773468
HiC_scaffold_10	32962837	32964284	HiC_scaffold_8	6751006	6754692
HiC_scaffold_10	32965143	32967636	HiC_scaffold_8	6747980	6750302
HiC_scaffold_10	32970620	32977873	HiC_scaffold_8	6737583	6744724
HiC_scaffold_10	32992591	32995142	HiC_scaffold_8	6704347	6706894
HiC_scaffold_10	32996711	33004487	HiC_scaffold_8	6694667	6702525
HiC_scaffold_10	33007826	33012260	HiC_scaffold_8	6686524	6691080
HiC_scaffold_10	33057544	33059549	HiC_scaffold_8	6680324	6682648
HiC_scaffold_10	33060555	33064079	HiC_scaffold_8	6670266	6678938
HiC_scaffold_10	33070382	33071962	HiC_scaffold_8	6667885	6669489
HiC_scaffold_10	33125574	33128567	HiC_scaffold_8	6614820	6617707
HiC_scaffold_10	33131540	33138069	HiC_scaffold_8	6601241	6607890
HiC_scaffold_10	33140099	33143903	HiC_scaffold_8	6564996	6568808
HiC_scaffold_10	33159213	33159965	HiC_scaffold_8	6534931	6536247
HiC_scaffold_10	33164051	33170499	HiC_scaffold_8	6524470	6530854
HiC_scaffold_10	33170772	33173814	HiC_scaffold_8	6521298	6524199
HiC_scaffold_10	33173946	33178222	HiC_scaffold_8	6516245	6520985
HiC_scaffold_10	33186339	33190597	HiC_scaffold_8	6504347	6508182
HiC_scaffold_10	33191804	33194787	HiC_scaffold_8	6499898	6502874
HiC_scaffold_10	33202939	33204453	HiC_scaffold_8	6486540	6488040
HiC_scaffold_10	33204768	33206591	HiC_scaffold_8	6484089	6486311
HiC_scaffold_10	33210585	33215556	HiC_scaffold_8	6466696	6471221
HiC_scaffold_10	33403794	33407015	HiC_scaffold_8	6423448	6427625
HiC_scaffold_10	34229476	34230877	HiC_scaffold_8	5552806	5555370
HiC_scaffold_10	34231862	34236912	HiC_scaffold_8	5546071	5551845
HiC_scaffold_10	34279310	34284442	HiC_scaffold_8	5487130	5491552
HiC_scaffold_10	34284916	34297763	HiC_scaffold_8	5466659	5486428
HiC_scaffold_10	34335752	34337018	HiC_scaffold_8	5418577	5420647
HiC_scaffold_10	34344347	34347003	HiC_scaffold_8	5368792	5373761
HiC_scaffold_10	34350804	34353210	HiC_scaffold_8	5360379	5363783
HiC_scaffold_10	34376318	34378608	HiC_scaffold_8	5352138	5356895
HiC_scaffold_10	34385588	34394167	HiC_scaffold_8	5340906	5349230
HiC_scaffold_10	34398461	34404394	HiC_scaffold_8	5330698	5336864
HiC_scaffold_10	34406745	34407470	HiC_scaffold_8	5327186	5327911
HiC_scaffold_10	34413070	34416537	HiC_scaffold_8	5315527	5319187
HiC_scaffold_10	34429090	34431195	HiC_scaffold_8	5301024	5303183
HiC_scaffold_10	34440359	34443652	HiC_scaffold_8	5290766	5294931
HiC_scaffold_10	34453465	34454166	HiC_scaffold_8	5271056	5271646
HiC_scaffold_10	34490391	34491851	HiC_scaffold_8	5223004	5226746
HiC_scaffold_10	34515159	34515989	HiC_scaffold_8	5208534	5209352
HiC_scaffold_10	34521196	34526431	HiC_scaffold_8	5167139	5171395
HiC_scaffold_10	34578483	34580201	HiC_scaffold_8	5155908	5157662
HiC_scaffold_10	34588667	34591482	HiC_scaffold_8	5113796	5117214
HiC_scaffold_10	34601156	34602154	HiC_scaffold_8	5101933	5102940
HiC_scaffold_10	34619467	34623976	HiC_scaffold_8	5085669	5095409
HiC_scaffold_10	34653630	34657114	HiC_scaffold_8	5080702	5082912
HiC_scaffold_10	34660604	34661557	HiC_scaffold_8	5033708	5034661
HiC_scaffold_10	34667086	34669689	HiC_scaffold_8	5019549	5022058
HiC_scaffold_10	34777378	34778727	HiC_scaffold_8	4984623	4986816
HiC_scaffold_10	34787685	34789581	HiC_scaffold_8	4971877	4973975
HiC_scaffold_10	34798818	34800703	HiC_scaffold_8	4883771	4884842
HiC_scaffold_10	34801988	34804428	HiC_scaffold_8	4879812	4883163
HiC_scaffold_10	34822797	34824259	HiC_scaffold_8	4863696	4864540
HiC_scaffold_10	34826751	34826968	HiC_scaffold_8	4860325	4860542
HiC_scaffold_10	34840947	34841308	HiC_scaffold_8	4846147	4846484
HiC_scaffold_10	34845481	34850216	HiC_scaffold_8	4839455	4843506
HiC_scaffold_10	34874065	34875492	HiC_scaffold_8	4827179	4828486
HiC_scaffold_10	34892445	34897731	HiC_scaffold_8	4801969	4807236
HiC_scaffold_10	34910532	34926732	HiC_scaffold_8	4788459	4790571
HiC_scaffold_10	34949530	34955245	HiC_scaffold_8	4763408	4768280
HiC_scaffold_10	34959767	34961188	HiC_scaffold_8	4754958	4758438
HiC_scaffold_10	35053905	35054552	HiC_scaffold_8	4708622	4709236
HiC_scaffold_10	35074983	35075993	HiC_scaffold_8	4691581	4692607
HiC_scaffold_10	35082390	35084428	HiC_scaffold_8	4682252	4684246
HiC_scaffold_10	35086734	35088761	HiC_scaffold_8	4677992	4679917
HiC_scaffold_10	35090249	35093900	HiC_scaffold_8	4673283	4676252
HiC_scaffold_10	35116594	35118746	HiC_scaffold_8	4634269	4634573
HiC_scaffold_10	35127089	35128335	HiC_scaffold_8	4622196	4623449
HiC_scaffold_10	35212108	35221745	HiC_scaffold_8	4570089	4576539
HiC_scaffold_10	35222731	35237866	HiC_scaffold_8	4558471	4569038
HiC_scaffold_10	35268306	35269043	HiC_scaffold_8	4518707	4520491
HiC_scaffold_10	35281229	35285866	HiC_scaffold_8	4501818	4505218
HiC_scaffold_10	35286274	35288132	HiC_scaffold_8	4499657	4501417
HiC_scaffold_10	35342567	35342979	HiC_scaffold_8	4292149	4294172
HiC_scaffold_10	35348477	35348801	HiC_scaffold_8	4285152	4289075
HiC_scaffold_10	16887829	16891117	HiC_scaffold_8	24396115	24401556
HiC_scaffold_10	17191806	17195280	HiC_scaffold_8	24328589	24332102
HiC_scaffold_10	17291476	17295544	HiC_scaffold_8	24248449	24252615
HiC_scaffold_10	17384753	17386843	HiC_scaffold_8	23896075	23898234
HiC_scaffold_10	17399089	17400083	HiC_scaffold_8	23872666	23873205
HiC_scaffold_10	17671759	17675657	HiC_scaffold_8	23321304	23326150
HiC_scaffold_10	17901826	17903404	HiC_scaffold_8	23036832	23037942
HiC_scaffold_10	18057502	18061334	HiC_scaffold_8	22973736	22979035
HiC_scaffold_10	18188711	18192465	HiC_scaffold_8	22938311	22938754
HiC_scaffold_10	18210090	18211373	HiC_scaffold_8	22926760	22927413
HiC_scaffold_10	18212316	18212615	HiC_scaffold_8	22644613	22645274
HiC_scaffold_10	18680673	18685012	HiC_scaffold_8	22238760	22243021
HiC_scaffold_10	18722944	18733153	HiC_scaffold_8	22169182	22173678
HiC_scaffold_10	18904952	18907059	HiC_scaffold_8	22003506	22005277
HiC_scaffold_10	18945427	18946437	HiC_scaffold_8	21988809	21989816
HiC_scaffold_10	19081158	19081493	HiC_scaffold_8	21886171	21890504
HiC_scaffold_10	19254190	19261533	HiC_scaffold_8	21791631	21798652
HiC_scaffold_10	19286214	19291778	HiC_scaffold_8	21756679	21759306
HiC_scaffold_10	19329210	19334608	HiC_scaffold_8	21557228	21563256
HiC_scaffold_10	19539543	19539976	HiC_scaffold_8	21518162	21518491
HiC_scaffold_10	19592757	19594859	HiC_scaffold_8	21208162	21210258
HiC_scaffold_10	19731705	19741858	HiC_scaffold_8	20974452	20985323
HiC_scaffold_10	19789260	19789535	HiC_scaffold_8	20707942	20708125
HiC_scaffold_10	19823576	19823824	HiC_scaffold_8	20376611	20376952
HiC_scaffold_10	20165546	20169499	HiC_scaffold_8	19889175	19892075
HiC_scaffold_10	20171534	20174626	HiC_scaffold_8	19883082	19885683
HiC_scaffold_10	20485336	20488795	HiC_scaffold_8	19651180	19654278
HiC_scaffold_10	20493405	20497499	HiC_scaffold_8	19612544	19616428
HiC_scaffold_10	20881042	20882644	HiC_scaffold_8	19536828	19537498
HiC_scaffold_10	20928004	20933897	HiC_scaffold_8	19431453	19433273
HiC_scaffold_10	21086027	21086372	HiC_scaffold_8	19392392	19401324
HiC_scaffold_10	21209253	21212461	HiC_scaffold_8	19274053	19277424
HiC_scaffold_10	21333322	21337343	HiC_scaffold_8	19119904	19124310
HiC_scaffold_10	21637153	21645792	HiC_scaffold_8	18997313	19003123
HiC_scaffold_10	21652787	21653419	HiC_scaffold_8	18993825	18994454
HiC_scaffold_10	21681994	21684295	HiC_scaffold_8	18989224	18991564
HiC_scaffold_10	21741885	21744934	HiC_scaffold_8	18704494	18706444
HiC_scaffold_10	21798289	21801841	HiC_scaffold_8	18682046	18688837
HiC_scaffold_10	21898063	21910396	HiC_scaffold_8	18589996	18601418
HiC_scaffold_10	21919515	21920774	HiC_scaffold_8	18554612	18558068
HiC_scaffold_10	22008616	22017018	HiC_scaffold_8	18370469	18378103
HiC_scaffold_10	22026341	22032013	HiC_scaffold_8	18205713	18209922
HiC_scaffold_10	22370415	22372812	HiC_scaffold_8	18068739	18071175
HiC_scaffold_10	22437235	22437615	HiC_scaffold_8	18048367	18048747
HiC_scaffold_10	22440989	22447344	HiC_scaffold_8	18037581	18044791
HiC_scaffold_10	22571735	22572982	HiC_scaffold_8	17727513	17732626
HiC_scaffold_10	6340876	6342554	HiC_scaffold_8	33544312	33546080
HiC_scaffold_10	6354262	6357921	HiC_scaffold_8	33533961	33536921
HiC_scaffold_10	6358384	6361980	HiC_scaffold_8	33530336	33533308
HiC_scaffold_10	6588394	6588618	HiC_scaffold_8	33299739	33299963
HiC_scaffold_10	6839186	6840441	HiC_scaffold_8	33038797	33039120
HiC_scaffold_10	6841024	6842349	HiC_scaffold_8	33036667	33037595
HiC_scaffold_10	6853995	6862239	HiC_scaffold_8	33021657	33030580
HiC_scaffold_10	6960634	6960969	HiC_scaffold_8	32946022	32951044
HiC_scaffold_10	7038869	7040229	HiC_scaffold_8	32938831	32939676
HiC_scaffold_10	7052892	7054332	HiC_scaffold_8	32921587	32923056
HiC_scaffold_10	7189573	7192891	HiC_scaffold_8	32882118	32884789
HiC_scaffold_10	7293906	7296450	HiC_scaffold_8	32792747	32795114
HiC_scaffold_10	7302397	7304108	HiC_scaffold_8	32782833	32785786
HiC_scaffold_10	7422733	7424320	HiC_scaffold_8	32701257	32702857
HiC_scaffold_10	7630611	7632677	HiC_scaffold_8	32584776	32587569
HiC_scaffold_10	7716862	7721209	HiC_scaffold_8	32484883	32488257
HiC_scaffold_10	7830493	7833106	HiC_scaffold_8	32138030	32139417
HiC_scaffold_10	7837216	7839179	HiC_scaffold_8	31685823	31688917
HiC_scaffold_10	5507275	5509303	HiC_scaffold_8	38123605	38125272
HiC_scaffold_10	5626619	5629011	HiC_scaffold_8	38104999	38107769
HiC_scaffold_10	5911012	5914843	HiC_scaffold_8	38076048	38079861
HiC_scaffold_10	5939458	5940207	HiC_scaffold_8	37993520	37994269
HiC_scaffold_10	5945759	5948083	HiC_scaffold_8	37983585	37985834
HiC_scaffold_10	5966474	5967106	HiC_scaffold_8	37933700	37934329
HiC_scaffold_10	5994452	6001923	HiC_scaffold_8	37923397	37929288
HiC_scaffold_10	6002016	6003780	HiC_scaffold_8	37911077	37912851
HiC_scaffold_10	6004679	6011549	HiC_scaffold_8	37903266	37910184
HiC_scaffold_10	6030550	6033571	HiC_scaffold_8	37775401	37779630
HiC_scaffold_10	12240863	12242205	HiC_scaffold_8	28801182	28803995
HiC_scaffold_10	12247530	12249816	HiC_scaffold_8	28532719	28535216
HiC_scaffold_10	12677282	12681554	HiC_scaffold_8	27954831	27959363
HiC_scaffold_10	12695125	12696076	HiC_scaffold_8	27953615	27954581
HiC_scaffold_10	13116520	13117692	HiC_scaffold_8	27466560	27466910
HiC_scaffold_10	13221097	13221393	HiC_scaffold_8	27437894	27438737
HiC_scaffold_10	13236971	13243337	HiC_scaffold_8	27400172	27405652
HiC_scaffold_10	13688875	13689850	HiC_scaffold_8	27000596	27002929
HiC_scaffold_10	34149962	34150895	HiC_scaffold_8	5208534	5209352
HiC_scaffold_10	34314646	34316149	HiC_scaffold_8	5167139	5171395
HiC_scaffold_10	34490391	34491851	HiC_scaffold_8	5080702	5082912
HiC_scaffold_10	34650353	34651446	HiC_scaffold_8	5074965	5078292
HiC_scaffold_10	34698767	34699792	HiC_scaffold_8	4984623	4986816
HiC_scaffold_10	34711978	34713187	HiC_scaffold_8	4883771	4884842
HiC_scaffold_10	34721597	34724363	HiC_scaffold_8	4879812	4883163
HiC_scaffold_10	34733781	34735215	HiC_scaffold_8	4863696	4864540
HiC_scaffold_10	34751582	34751938	HiC_scaffold_8	4846147	4846484
HiC_scaffold_10	32866678	32867507	HiC_scaffold_8	6767612	6773468
HiC_scaffold_10	32873026	32874483	HiC_scaffold_8	6751006	6754692
HiC_scaffold_10	32875341	32877823	HiC_scaffold_8	6747980	6750302
HiC_scaffold_10	32880787	32888046	HiC_scaffold_8	6737583	6744724
HiC_scaffold_10	32902353	32904362	HiC_scaffold_8	6704347	6706894
HiC_scaffold_10	32909229	32914174	HiC_scaffold_8	6694667	6702525
HiC_scaffold_10	32917501	32923434	HiC_scaffold_8	6686524	6691080
HiC_scaffold_10	2633568	2636268	HiC_scaffold_8	36899919	36903968
HiC_scaffold_10	2645245	2648010	HiC_scaffold_8	36895753	36896451
HiC_scaffold_10	3011096	3012890	HiC_scaffold_8	36120252	36121746
HiC_scaffold_10	3118133	3119019	HiC_scaffold_8	36035082	36035474
HiC_scaffold_10	3136975	3140153	HiC_scaffold_8	36011017	36016392
HiC_scaffold_10	3161807	3164322	HiC_scaffold_8	35979489	35981991
HiC_scaffold_10	3172340	3175274	HiC_scaffold_8	35969860	35974560
HiC_scaffold_10	216861	219703	HiC_scaffold_8	35269304	35272446
HiC_scaffold_10	461450	463555	HiC_scaffold_8	35000777	35003650
HiC_scaffold_10	527764	530708	HiC_scaffold_8	34992301	34995241
HiC_scaffold_10	590417	591571	HiC_scaffold_8	34934977	34936137
HiC_scaffold_10	677162	679220	HiC_scaffold_8	34781040	34783061
HiC_scaffold_10	679903	687043	HiC_scaffold_8	34773713	34780283
HiC_scaffold_10	700267	703400	HiC_scaffold_8	34757939	34760927
HiC_scaffold_10	23558184	23563594	HiC_scaffold_8	17350406	17362052
HiC_scaffold_10	24065157	24067475	HiC_scaffold_8	17140935	17142976
HiC_scaffold_10	24126279	24126659	HiC_scaffold_8	17048700	17050423
HiC_scaffold_10	24139197	24140105	HiC_scaffold_8	17034321	17035925
HiC_scaffold_10	24167598	24171623	HiC_scaffold_8	17019812	17023515
HiC_scaffold_10	24173143	24179327	HiC_scaffold_8	17012224	17017813
HiC_scaffold_10	8757319	8768196	HiC_scaffold_8	32388779	32397012
HiC_scaffold_10	8768376	8770973	HiC_scaffold_8	32378595	32381466
HiC_scaffold_10	9130709	9134836	HiC_scaffold_8	32350001	32354304
HiC_scaffold_10	9187651	9190161	HiC_scaffold_8	32321128	32323689
HiC_scaffold_10	9400956	9401822	HiC_scaffold_8	32231933	32232773
HiC_scaffold_10	10080059	10082136	HiC_scaffold_8	32138030	32139417
HiC_scaffold_10	13951237	13955917	HiC_scaffold_8	25920250	25921733
HiC_scaffold_10	14490173	14490688	HiC_scaffold_8	25830108	25832129
HiC_scaffold_10	14968717	14969385	HiC_scaffold_8	25195558	25196241
HiC_scaffold_10	15037127	15039658	HiC_scaffold_8	25020637	25022158
HiC_scaffold_10	15127790	15129600	HiC_scaffold_8	24391367	24391849
HiC_scaffold_10	14490173	14490688	HiC_scaffold_8	32138030	32139417
HiC_scaffold_10	14585701	14588733	HiC_scaffold_8	31685823	31688917
HiC_scaffold_10	14679472	14679814	HiC_scaffold_8	30780507	30780859
HiC_scaffold_10	14760456	14760713	HiC_scaffold_8	30519101	30519697
HiC_scaffold_10	15127790	15129600	HiC_scaffold_8	29880031	29882230
HiC_scaffold_13	24300044	24303525	HiC_scaffold_10	16117824	16119321
HiC_scaffold_13	24875923	24876420	HiC_scaffold_10	15849143	15849638
HiC_scaffold_13	25658665	25659859	HiC_scaffold_10	15127790	15129600
HiC_scaffold_13	26377769	26378913	HiC_scaffold_10	14490173	14490688
HiC_scaffold_13	27005683	27007727	HiC_scaffold_10	13951237	13955917
HiC_scaffold_13	15876487	15877151	HiC_scaffold_13	16170020	16172439
HiC_scaffold_13	16067471	16068324	HiC_scaffold_13	16589340	16589748
HiC_scaffold_13	16157897	16160059	HiC_scaffold_13	16719080	16720871
HiC_scaffold_13	16197483	16198309	HiC_scaffold_13	16740849	16741466
HiC_scaffold_13	16589340	16589748	HiC_scaffold_13	17023247	17024584
HiC_scaffold_13	16859283	16859648	HiC_scaffold_13	17164982	17165826
HiC_scaffold_13	17072394	17072780	HiC_scaffold_13	17295504	17295965
HiC_scaffold_13	17094693	17095563	HiC_scaffold_13	17305971	17306570
HiC_scaffold_13	17164982	17165826	HiC_scaffold_13	17567661	17568525
HiC_scaffold_13	17295504	17295965	HiC_scaffold_13	17749244	17749600
HiC_scaffold_13	17305971	17306570	HiC_scaffold_13	17771075	17771945
HiC_scaffold_13	17431017	17433431	HiC_scaffold_13	17891628	17893383
HiC_scaffold_13	17567661	17568525	HiC_scaffold_13	17987186	17987588
HiC_scaffold_13	16067471	16068324	HiC_scaffold_13	17023247	17024584
HiC_scaffold_13	16168963	16169367	HiC_scaffold_13	17164982	17165826
HiC_scaffold_13	16170020	16172439	HiC_scaffold_13	17573717	17575646
HiC_scaffold_13	16197483	16198309	HiC_scaffold_13	17678486	17679040
HiC_scaffold_13	16222922	16223386	HiC_scaffold_13	17749244	17749600
HiC_scaffold_13	16273976	16276445	HiC_scaffold_13	17891628	17893383
HiC_scaffold_13	16399154	16399337	HiC_scaffold_13	17894376	17895257
HiC_scaffold_13	16470456	16471520	HiC_scaffold_13	17911108	17912232
HiC_scaffold_13	16589340	16589748	HiC_scaffold_13	17998688	17999031
HiC_scaffold_13	17024776	17025003	HiC_scaffold_13	18018809	18018982
HiC_scaffold_13	16168963	16169367	HiC_scaffold_13	16859283	16859648
HiC_scaffold_13	16222922	16223386	HiC_scaffold_13	17072394	17072780
HiC_scaffold_13	16273976	16276445	HiC_scaffold_13	17431017	17433431
HiC_scaffold_13	16589340	16589748	HiC_scaffold_13	17579188	17579813
HiC_scaffold_13	16740849	16741466	HiC_scaffold_13	17678486	17679040
HiC_scaffold_13	17072394	17072780	HiC_scaffold_13	17749244	17749600
HiC_scaffold_13	17094693	17095563	HiC_scaffold_13	17771075	17771945
HiC_scaffold_13	17164982	17165826	HiC_scaffold_13	17987186	17987588
HiC_scaffold_13	13883315	13884133	HiC_scaffold_13	15880212	15881032
HiC_scaffold_13	14039434	14040753	HiC_scaffold_13	15876487	15877151
HiC_scaffold_13	14234073	14236717	HiC_scaffold_13	15504423	15507523
HiC_scaffold_13	14657214	14662791	HiC_scaffold_13	15158434	15164008
HiC_scaffold_13	14738288	14738547	HiC_scaffold_13	15104982	15106574
HiC_scaffold_13	14741949	14744652	HiC_scaffold_13	15099067	15101768
HiC_scaffold_13	14780563	14781047	HiC_scaffold_13	15043271	15043657
HiC_scaffold_13	14799797	14800982	HiC_scaffold_13	14828153	14829029
HiC_scaffold_13	15504423	15507523	HiC_scaffold_13	17891628	17893383
HiC_scaffold_13	15876487	15877151	HiC_scaffold_13	17743853	17744042
HiC_scaffold_13	16067471	16068324	HiC_scaffold_13	17579188	17579813
HiC_scaffold_13	16170020	16172439	HiC_scaffold_13	17573717	17575646
HiC_scaffold_13	16273976	16276445	HiC_scaffold_13	17431017	17433431
HiC_scaffold_13	16859283	16859648	HiC_scaffold_13	17164982	17165826
HiC_scaffold_13	16170020	16172439	HiC_scaffold_13	15876487	15877151
HiC_scaffold_13	16589340	16589748	HiC_scaffold_13	16067471	16068324
HiC_scaffold_13	16719080	16720871	HiC_scaffold_13	16157897	16160059
HiC_scaffold_13	16859283	16859648	HiC_scaffold_13	16168963	16169367
HiC_scaffold_13	17072394	17072780	HiC_scaffold_13	16222922	16223386
HiC_scaffold_13	17164982	17165826	HiC_scaffold_13	16859283	16859648
HiC_scaffold_13	17295504	17295965	HiC_scaffold_13	17072394	17072780
HiC_scaffold_13	17305971	17306570	HiC_scaffold_13	17094693	17095563
HiC_scaffold_13	17567661	17568525	HiC_scaffold_13	17164982	17165826
HiC_scaffold_13	17749244	17749600	HiC_scaffold_13	17295504	17295965
HiC_scaffold_13	17771075	17771945	HiC_scaffold_13	17305971	17306570
HiC_scaffold_13	17891628	17893383	HiC_scaffold_13	17431017	17433431
HiC_scaffold_13	17987186	17987588	HiC_scaffold_13	17567661	17568525
HiC_scaffold_13	17023247	17024584	HiC_scaffold_13	16067471	16068324
HiC_scaffold_13	17164982	17165826	HiC_scaffold_13	16168963	16169367
HiC_scaffold_13	17573717	17575646	HiC_scaffold_13	16170020	16172439
HiC_scaffold_13	17678486	17679040	HiC_scaffold_13	16197483	16198309
HiC_scaffold_13	17749244	17749600	HiC_scaffold_13	16222922	16223386
HiC_scaffold_13	17891628	17893383	HiC_scaffold_13	16273976	16276445
HiC_scaffold_13	17894376	17895257	HiC_scaffold_13	16399154	16399337
HiC_scaffold_13	17911108	17912232	HiC_scaffold_13	16470456	16471520
HiC_scaffold_13	17998688	17999031	HiC_scaffold_13	16589340	16589748
HiC_scaffold_13	18018809	18018982	HiC_scaffold_13	17024776	17025003
HiC_scaffold_13	17295504	17295965	HiC_scaffold_13	16222922	16223386
HiC_scaffold_13	17431017	17433431	HiC_scaffold_13	16273976	16276445
HiC_scaffold_13	17579188	17579813	HiC_scaffold_13	16589340	16589748
HiC_scaffold_13	17678486	17679040	HiC_scaffold_13	16740849	16741466
HiC_scaffold_13	17749244	17749600	HiC_scaffold_13	17072394	17072780
HiC_scaffold_13	17771075	17771945	HiC_scaffold_13	17094693	17095563
HiC_scaffold_13	17987186	17987588	HiC_scaffold_13	17164982	17165826
HiC_scaffold_13	14828153	14829029	HiC_scaffold_13	14799797	14800982
HiC_scaffold_13	15043271	15043657	HiC_scaffold_13	14780563	14781047
HiC_scaffold_13	15099067	15101768	HiC_scaffold_13	14741949	14744652
HiC_scaffold_13	15104982	15106574	HiC_scaffold_13	14738288	14738547
HiC_scaffold_13	15158434	15164008	HiC_scaffold_13	14657214	14662791
HiC_scaffold_13	15504423	15507523	HiC_scaffold_13	14234073	14236717
HiC_scaffold_13	15876487	15877151	HiC_scaffold_13	14039434	14040753
HiC_scaffold_13	15880212	15881032	HiC_scaffold_13	13883315	13884133
HiC_scaffold_13	17164982	17165826	HiC_scaffold_13	16859283	16859648
HiC_scaffold_13	17431017	17433431	HiC_scaffold_13	16273976	16276445
HiC_scaffold_13	17573717	17575646	HiC_scaffold_13	16170020	16172439
HiC_scaffold_13	17579188	17579813	HiC_scaffold_13	16067471	16068324
HiC_scaffold_13	17743853	17744042	HiC_scaffold_13	15876487	15877151
HiC_scaffold_13	17891628	17893383	HiC_scaffold_13	15504423	15507523
HiC_scaffold_13	24300044	24303525	HiC_scaffold_15	8733060	8734277
HiC_scaffold_13	24848662	24849528	HiC_scaffold_15	9090679	9092831
HiC_scaffold_13	24875923	24876420	HiC_scaffold_15	10080147	10080635
HiC_scaffold_13	25202267	25203425	HiC_scaffold_15	10178457	10179878
HiC_scaffold_13	25748703	25750316	HiC_scaffold_15	10391882	10392499
HiC_scaffold_13	25831078	25831599	HiC_scaffold_15	10448636	10449316
HiC_scaffold_13	2927558	2929833	HiC_scaffold_2	21873438	21875984
HiC_scaffold_13	2937873	2939864	HiC_scaffold_2	21869577	21872103
HiC_scaffold_13	2945661	2948764	HiC_scaffold_2	21668540	21671995
HiC_scaffold_13	3092682	3094619	HiC_scaffold_2	21416647	21420774
HiC_scaffold_13	3117684	3118577	HiC_scaffold_2	21281709	21282695
HiC_scaffold_13	3235090	3236253	HiC_scaffold_2	20829639	20832882
HiC_scaffold_13	24300044	24303525	HiC_scaffold_23	13688765	13689437
HiC_scaffold_13	24443516	24446472	HiC_scaffold_23	13598862	13599472
HiC_scaffold_13	24760040	24760339	HiC_scaffold_23	13046665	13047615
HiC_scaffold_13	25202267	25203425	HiC_scaffold_23	12606163	12607246
HiC_scaffold_13	25837456	25838200	HiC_scaffold_23	12519671	12519910
HiC_scaffold_13	2033144	2035705	HiC_scaffold_34	12364426	12366297
HiC_scaffold_13	2085768	2087547	HiC_scaffold_34	12426144	12426761
HiC_scaffold_13	2332790	2335768	HiC_scaffold_34	12471811	12475769
HiC_scaffold_13	2425709	2435747	HiC_scaffold_34	12506433	12508758
HiC_scaffold_13	2516303	2521325	HiC_scaffold_34	12636636	12639474
HiC_scaffold_13	2660640	2662067	HiC_scaffold_34	12719701	12722676
HiC_scaffold_13	2680896	2682515	HiC_scaffold_34	12754322	12757386
HiC_scaffold_13	1914581	1914835	HiC_scaffold_36	17040598	17040793
HiC_scaffold_13	1920047	1921033	HiC_scaffold_36	17075658	17076524
HiC_scaffold_13	2063829	2065524	HiC_scaffold_36	17369971	17371782
HiC_scaffold_13	2077002	2078559	HiC_scaffold_36	17552467	17553842
HiC_scaffold_13	2278696	2280098	HiC_scaffold_36	17774145	17774750
HiC_scaffold_13	2356616	2358916	HiC_scaffold_36	18266663	18268966
HiC_scaffold_13	21427520	21428410	HiC_scaffold_39	20341006	20341706
HiC_scaffold_13	21882868	21883176	HiC_scaffold_39	20477461	20477618
HiC_scaffold_13	22237990	22239016	HiC_scaffold_39	20791046	20791778
HiC_scaffold_13	22328254	22329071	HiC_scaffold_39	20970545	20972786
HiC_scaffold_13	22506005	22508446	HiC_scaffold_39	21151281	21153266
HiC_scaffold_13	24300044	24303525	HiC_scaffold_41	9096235	9098619
HiC_scaffold_13	24533505	24534584	HiC_scaffold_41	9177600	9178869
HiC_scaffold_13	25202267	25203425	HiC_scaffold_41	9186195	9187355
HiC_scaffold_13	25837456	25838200	HiC_scaffold_41	9637585	9639382
HiC_scaffold_13	26377769	26378913	HiC_scaffold_41	9721313	9722698
HiC_scaffold_13	35805752	35808109	HiC_scaffold_41	32317327	32319249
HiC_scaffold_13	35880935	35883126	HiC_scaffold_41	32311782	32312693
HiC_scaffold_13	35901777	35902823	HiC_scaffold_41	32293311	32294734
HiC_scaffold_13	35975228	35979975	HiC_scaffold_41	32274222	32276123
HiC_scaffold_13	36005985	36014417	HiC_scaffold_41	32265006	32266375
HiC_scaffold_13	24300044	24303525	HiC_scaffold_41	23948188	23948934
HiC_scaffold_13	24533505	24534584	HiC_scaffold_41	23594660	23595122
HiC_scaffold_13	24875923	24876420	HiC_scaffold_41	23589137	23589482
HiC_scaffold_13	25658665	25659859	HiC_scaffold_41	23137524	23139521
HiC_scaffold_13	26243895	26245003	HiC_scaffold_41	22479041	22479721
HiC_scaffold_13	495420	496912	HiC_scaffold_41	47489986	47490594
HiC_scaffold_13	683168	683668	HiC_scaffold_41	47351601	47352098
HiC_scaffold_13	695029	695699	HiC_scaffold_41	47035752	47039648
HiC_scaffold_13	870655	872235	HiC_scaffold_41	46811646	46824694
HiC_scaffold_13	934773	937674	HiC_scaffold_41	46695410	46699241
HiC_scaffold_13	2766576	2768964	HiC_scaffold_42	43300777	43302562
HiC_scaffold_13	2797713	2800085	HiC_scaffold_42	43492905	43494033
HiC_scaffold_13	2973841	2974968	HiC_scaffold_42	43642168	43643088
HiC_scaffold_13	3092682	3094619	HiC_scaffold_42	43889975	43892093
HiC_scaffold_13	3117684	3118577	HiC_scaffold_42	43966492	43967387
HiC_scaffold_13	14220199	14220621	HiC_scaffold_42	35280689	35281891
HiC_scaffold_13	14404696	14406027	HiC_scaffold_42	35557591	35559753
HiC_scaffold_13	14678780	14679154	HiC_scaffold_42	35640082	35641507
HiC_scaffold_13	14764182	14765605	HiC_scaffold_42	35649672	35649953
HiC_scaffold_13	14850323	14850551	HiC_scaffold_42	36189468	36189618
HiC_scaffold_13	25202267	25203425	HiC_scaffold_42	10350095	10350337
HiC_scaffold_13	25837456	25838200	HiC_scaffold_42	10988899	10989483
HiC_scaffold_13	26377769	26378913	HiC_scaffold_42	11077822	11078940
HiC_scaffold_13	26461508	26463163	HiC_scaffold_42	11439742	11439912
HiC_scaffold_13	27005683	27007727	HiC_scaffold_42	11798008	11798430
HiC_scaffold_13	21240408	21240932	HiC_scaffold_42	21247828	21249069
HiC_scaffold_13	21427520	21428410	HiC_scaffold_42	20796788	20798021
HiC_scaffold_13	21968958	21969971	HiC_scaffold_42	20487128	20487571
HiC_scaffold_13	22237990	22239016	HiC_scaffold_42	20070747	20071912
HiC_scaffold_13	22411051	22411257	HiC_scaffold_42	19980905	19981059
HiC_scaffold_13	22868768	22869993	HiC_scaffold_42	19533591	19534373
HiC_scaffold_13	3886541	3887011	HiC_scaffold_43	35412943	35413413
HiC_scaffold_13	3887988	3890662	HiC_scaffold_43	35414066	35416741
HiC_scaffold_13	3909149	3912379	HiC_scaffold_43	35427279	35429395
HiC_scaffold_13	3912503	3915340	HiC_scaffold_43	35429881	35432453
HiC_scaffold_13	3925358	3927064	HiC_scaffold_43	35436874	35438580
HiC_scaffold_13	3927560	3930825	HiC_scaffold_43	35439057	35442224
HiC_scaffold_13	4018607	4026796	HiC_scaffold_43	35502287	35505983
HiC_scaffold_13	28081382	28083512	HiC_scaffold_44	23226808	23228374
HiC_scaffold_13	28800388	28802889	HiC_scaffold_44	23316736	23319149
HiC_scaffold_13	29161596	29162009	HiC_scaffold_44	23670471	23670875
HiC_scaffold_13	29457188	29464530	HiC_scaffold_44	24301586	24305148
HiC_scaffold_13	29790055	29791214	HiC_scaffold_44	24307833	24309903
HiC_scaffold_13	2927558	2929833	HiC_scaffold_46	28292082	28294423
HiC_scaffold_13	2937873	2939864	HiC_scaffold_46	28295297	28297671
HiC_scaffold_13	2945661	2948764	HiC_scaffold_46	28517317	28520587
HiC_scaffold_13	3092682	3094619	HiC_scaffold_46	28735326	28740314
HiC_scaffold_13	3117684	3118577	HiC_scaffold_46	28944030	28945085
HiC_scaffold_13	3235090	3236253	HiC_scaffold_46	29281216	29284657
HiC_scaffold_13	3167367	3173514	HiC_scaffold_46	31808261	31811921
HiC_scaffold_13	3194006	3196372	HiC_scaffold_46	31803964	31805879
HiC_scaffold_13	3227592	3231337	HiC_scaffold_46	31761104	31766180
HiC_scaffold_13	3235090	3236253	HiC_scaffold_46	31751778	31752654
HiC_scaffold_13	3276524	3277216	HiC_scaffold_46	31724358	31725110
HiC_scaffold_13	3372819	3373121	HiC_scaffold_46	31710389	31710721
HiC_scaffold_13	3458823	3460617	HiC_scaffold_46	31668785	31669864
HiC_scaffold_13	3517476	3528567	HiC_scaffold_46	31660307	31667297
HiC_scaffold_13	1914581	1914835	HiC_scaffold_47	13027383	13027628
HiC_scaffold_13	1920047	1921033	HiC_scaffold_47	13233452	13234321
HiC_scaffold_13	2063829	2065524	HiC_scaffold_47	13524767	13526593
HiC_scaffold_13	2077002	2078559	HiC_scaffold_47	13676105	13677401
HiC_scaffold_13	2085768	2087547	HiC_scaffold_47	13771137	13772369
HiC_scaffold_13	2123548	2124978	HiC_scaffold_47	13962252	13963936
HiC_scaffold_13	2161294	2161746	HiC_scaffold_47	14002673	14003101
HiC_scaffold_13	2245341	2246685	HiC_scaffold_47	14303003	14305277
HiC_scaffold_13	6434763	6437464	HiC_scaffold_47	48229057	48232288
HiC_scaffold_13	6456040	6456567	HiC_scaffold_47	48255780	48256391
HiC_scaffold_13	6459388	6464475	HiC_scaffold_47	48296715	48300077
HiC_scaffold_13	6508652	6512874	HiC_scaffold_47	48333051	48339878
HiC_scaffold_13	6515981	6516626	HiC_scaffold_47	48343917	48344885
HiC_scaffold_13	6624510	6629148	HiC_scaffold_47	48352855	48420203
HiC_scaffold_13	6640835	6642392	HiC_scaffold_47	48489186	48490626
HiC_scaffold_13	6688643	6690426	HiC_scaffold_47	48547867	48551439
HiC_scaffold_13	3167367	3173514	HiC_scaffold_47	5257552	5264672
HiC_scaffold_13	3194006	3196372	HiC_scaffold_47	5266902	5268701
HiC_scaffold_13	3227592	3231337	HiC_scaffold_47	5312102	5317344
HiC_scaffold_13	3235090	3236253	HiC_scaffold_47	5321276	5322212
HiC_scaffold_13	3372819	3373121	HiC_scaffold_47	5354837	5355325
HiC_scaffold_13	3458823	3460617	HiC_scaffold_47	5462196	5463415
HiC_scaffold_13	10834481	10840123	HiC_scaffold_47	44460906	44463218
HiC_scaffold_13	10964710	10966132	HiC_scaffold_47	44474459	44476729
HiC_scaffold_13	11015706	11016884	HiC_scaffold_47	44543067	44544176
HiC_scaffold_13	11030698	11032542	HiC_scaffold_47	44599159	44605381
HiC_scaffold_13	11131822	11132460	HiC_scaffold_47	44635489	44636106
HiC_scaffold_13	11174856	11178474	HiC_scaffold_47	44651880	44654703
HiC_scaffold_13	10671914	10673167	HiC_scaffold_47	18780808	18794373
HiC_scaffold_13	10716557	10717197	HiC_scaffold_47	19081374	19082609
HiC_scaffold_13	10898732	10899643	HiC_scaffold_47	19260087	19260560
HiC_scaffold_13	11078685	11079191	HiC_scaffold_47	19620038	19620430
HiC_scaffold_13	11161365	11163224	HiC_scaffold_47	19988435	19989487
HiC_scaffold_13	11408238	11408679	HiC_scaffold_47	20313313	20316308
HiC_scaffold_13	7249689	7251592	HiC_scaffold_47	47762828	47766927
HiC_scaffold_13	7482246	7488879	HiC_scaffold_47	47722635	47734136
HiC_scaffold_13	7598499	7600374	HiC_scaffold_47	47590136	47592903
HiC_scaffold_13	7644857	7645522	HiC_scaffold_47	47556513	47557121
HiC_scaffold_13	7718548	7722129	HiC_scaffold_47	47512461	47514469
HiC_scaffold_13	7741662	7744986	HiC_scaffold_47	47423367	47426903
HiC_scaffold_13	7785659	7786785	HiC_scaffold_47	47376500	47377766
HiC_scaffold_13	7787062	7791401	HiC_scaffold_47	47372809	47376201
HiC_scaffold_13	7886653	7887941	HiC_scaffold_47	47362109	47363474
HiC_scaffold_13	7923486	7926659	HiC_scaffold_47	47286364	47288770
HiC_scaffold_13	8121826	8123596	HiC_scaffold_47	47127889	47131004
HiC_scaffold_13	8173919	8178643	HiC_scaffold_47	47089155	47094210
HiC_scaffold_13	8477727	8481238	HiC_scaffold_47	47044582	47050739
HiC_scaffold_13	8656513	8666090	HiC_scaffold_47	46703030	46714237
HiC_scaffold_13	4596750	4600453	HiC_scaffold_47	48972088	48975150
HiC_scaffold_13	4628436	4631011	HiC_scaffold_47	48969034	48970465
HiC_scaffold_13	4637464	4638636	HiC_scaffold_47	48966270	48967451
HiC_scaffold_13	4644670	4648072	HiC_scaffold_47	48956609	48959510
HiC_scaffold_13	4747799	4748149	HiC_scaffold_47	48932901	48933224
HiC_scaffold_13	4869193	4874609	HiC_scaffold_47	48902738	48905228
HiC_scaffold_13	4879014	4882429	HiC_scaffold_47	48880904	48884019
HiC_scaffold_13	4886861	4890180	HiC_scaffold_47	48871103	48876737
HiC_scaffold_13	4901253	4901846	HiC_scaffold_47	48726537	48727058
HiC_scaffold_13	34558278	34567958	HiC_scaffold_47	34004190	34014336
HiC_scaffold_13	34870827	34873403	HiC_scaffold_47	33791669	33794727
HiC_scaffold_13	34923569	34925937	HiC_scaffold_47	33572514	33574896
HiC_scaffold_13	35039947	35044331	HiC_scaffold_47	33535332	33538642
HiC_scaffold_13	35090361	35095612	HiC_scaffold_47	33493186	33494247
HiC_scaffold_13	35253267	35259555	HiC_scaffold_47	33022650	33027489
HiC_scaffold_13	35501079	35502778	HiC_scaffold_47	32769501	32771335
HiC_scaffold_13	619436	620269	HiC_scaffold_47	20152202	20152756
HiC_scaffold_13	666135	666902	HiC_scaffold_47	19770231	19771405
HiC_scaffold_13	704344	704769	HiC_scaffold_47	19015564	19016046
HiC_scaffold_13	847080	850089	HiC_scaffold_47	18594701	18597823
HiC_scaffold_13	969630	972705	HiC_scaffold_47	18253802	18256893
HiC_scaffold_13	1017694	1022102	HiC_scaffold_47	17670802	17674892
HiC_scaffold_13	11708994	11710160	HiC_scaffold_47	44254082	44255203
HiC_scaffold_13	11954072	11955466	HiC_scaffold_47	44195906	44198307
HiC_scaffold_13	12059810	12062093	HiC_scaffold_47	44159619	44160672
HiC_scaffold_13	12186377	12188780	HiC_scaffold_47	44148886	44152301
HiC_scaffold_13	12408283	12413980	HiC_scaffold_47	43920619	43924632
HiC_scaffold_13	26461508	26463163	HiC_scaffold_47	36812840	36814243
HiC_scaffold_13	27005683	27007727	HiC_scaffold_47	36630524	36631701
HiC_scaffold_13	27305645	27307254	HiC_scaffold_47	36246642	36247634
HiC_scaffold_13	27819670	27819918	HiC_scaffold_47	35559218	35559640
HiC_scaffold_13	28081382	28083512	HiC_scaffold_47	35550056	35552276
HiC_scaffold_13	4224119	4227431	HiC_scaffold_48	346285	349441
HiC_scaffold_13	4232223	4236820	HiC_scaffold_48	325317	329434
HiC_scaffold_13	4257648	4260081	HiC_scaffold_48	318728	319875
HiC_scaffold_13	4275425	4278352	HiC_scaffold_48	293090	296206
HiC_scaffold_13	4399568	4400970	HiC_scaffold_48	246729	247734
HiC_scaffold_13	4596750	4600453	HiC_scaffold_48	135264	137857
HiC_scaffold_13	4628436	4631011	HiC_scaffold_48	133340	134687
HiC_scaffold_13	4637464	4638636	HiC_scaffold_48	130991	132172
HiC_scaffold_13	4644670	4648072	HiC_scaffold_48	116547	118526
HiC_scaffold_13	4224119	4227431	HiC_scaffold_48	500053	502936
HiC_scaffold_13	4257648	4260081	HiC_scaffold_48	425099	426065
[truncated: 38,474 more rows]

[truncated: 2 more sheets: S11, S12]
